# Supplementary material for: Single molecule, full-length transcript sequencing provides insight into the TPS gene family in Paeonia ostii
Source: PeerJ. 2021 Jul 15;9:e11808. doi: 10.7717/peerj.11808 (PMC8286706; doi:10.7717/peerj.11808)
Supplement: Supplemental Information 4 [file peerj-09-11808-s004.xlsx]

## Sheet: Sheet1
Expression profiles of the 10 PoTPS genes in different tissues and different periods.
Seeds	PoTPS1	PoTPS6	PoTPS8	PoTPS7	PoTPS10	PoTPS5	PoTPS3	PoTPS4	PoTPS9	PoTPS11
30d	63.1268	133.716	37.9409	61.499	278.186	414.209	136.981	154.784	204.521	212.941
50d	178.361	140.92	15.8911	44.2924	86.4932	385.232	78.1266	104.762	206.063	911.411
70d	253.364	193.852	22.3413	56.3229	127.546	371.015	73.4462	34.173	83.5619	23.7541
Leaves	PoTPS1	PoTPS6	PoTPS8	PoTPS7	PoTPS10	PoTPS5	PoTPS3	PoTPS4	PoTPS9	PoTPS11
30d	15.4763	100.569	73.4917	173.911	351.233	316.088	225.462	381.438	113.397	799.636
50d	159.043	749.521	1355.42	184.064	557.628	1418.83	742.384	972.55	187.854	86.6034
70d	115.975	1000.64	53.2803	100.031	170.119	1853.55	289.064	199.155	57.9955	126.543
Stems	PoTPS1	PoTPS6	PoTPS8	PoTPS7	PoTPS10	PoTPS5	PoTPS3	PoTPS4	PoTPS9	PoTPS11
30d	63.1268	133.716	37.9409	61.499	278.186	414.209	136.981	154.784	204.521	212.941
50d	178.361	140.92	15.8911	44.2924	86.4932	385.232	78.1266	104.762	206.063	911.411
70d	253.364	193.852	22.3413	56.3229	127.546	371.015	73.4462	34.173	83.5619	23.7541
