# Supplementary material for: Single molecule, full-length transcript sequencing provides insight into the TPS gene family in Paeonia ostii
Source: PeerJ. 2021 Jul 15;9:e11808. doi: 10.7717/peerj.11808 (PMC8286706; doi:10.7717/peerj.11808)
Supplement: Supplemental Information 12 [file peerj-09-11808-s012.xls]

## Sheet: Integrated_Function.anno
#GeneID	COG_class	COG_class_annotation	GO_annotation	KEGG_annotation	KOG_class	KOG_class_annotation	Pfam_annotation	Swissprot_annotation	eggNOG_class	eggNOG_class_annotation	nr_annotation
F01_c10019/f1p0/1016	[J]	Translation, ribosomal structure and biogenesis	Cellular Component: ribosome (GO:0005840);; Biological Process: ribosome biogenesis (GO:0042254);;	K02936|1.98221e-90|pvu:PHAVU_007G274200g|hypothetical protein; K02936 large subunit ribosomal protein L7Ae (A)	[J]	Translation, ribosomal structure and biogenesis	Ribosomal protein L7Ae/L30e/S12e/Gadd45 family	60S ribosomal protein L7a OS=Oryza sativa subsp. japonica (Rice) PE=2 SV=1	J	Translation, ribosomal structure and biogenesis	hypothetical protein M422DRAFT_57695 [Sphaerobolus stellatus SS14]
F01_c9070/f1p10/1247	[C]	Energy production and conversion	Cellular Component: plant-type vacuole (GO:0000325);; Biological Process: cell morphogenesis (GO:0000902);; Molecular Function: protease binding (GO:0002020);; Molecular Function: ATP binding (GO:0005524);; Cellular Component: cell wall (GO:0005618);; Cellular Component: vacuolar membrane (GO:0005774);; Cellular Component: Golgi apparatus (GO:0005794);; Cellular Component: plasma membrane (GO:000…	K02145|0|vvi:100261512|V-type proton ATPase catalytic subunit A; K02145 V-type H+-transporting ATPase subunit A [EC:3.6.3.14] (A)	[C]	Energy production and conversion	ATP synthase alpha/beta family, nucleotide-binding domain;; ATP synthase alpha/beta chain, C terminal domain	V-type proton ATPase catalytic subunit A OS=Citrus unshiu (Satsuma mandarin) PE=2 SV=1	C	Energy production and conversion	vacuolar H+-ATPase A subunit [Citrus unshiu]
F01_c15693/f1p1/3208	[LK]	--	Biological Process: DNA metabolic process (GO:0006259);; Molecular Function: ATP-dependent helicase activity (GO:0008026);; Molecular Function: organic cyclic compound binding (GO:0097159);; Molecular Function: heterocyclic compound binding (GO:1901363);;	K03655|0|vvi:100252614|uncharacterized LOC100252614; K03655 ATP-dependent DNA helicase RecG [EC:3.6.4.12] (A)	[A]	RNA processing and modification	Helicase conserved C-terminal domain	DEAD-box ATP-dependent RNA helicase 53 GN=RH53 OS=Arabidopsis thaliana (Mouse-ear cress) PE=2 SV=1	L	Replication, recombination and repair	PREDICTED: uncharacterized protein LOC100252614 isoform X2 [Vitis vinifera]
F01_c6383/f1p0/1482	--	--	--	--	[I]	Lipid transport and metabolism	Plasma-membrane choline transporter	--	I	Lipid transport and metabolism	PREDICTED: protein PNS1-like [Populus euphratica]
F01_c12374/f1p2/1399	[RTKL]	--	Molecular Function: nucleotide binding (GO:0000166);; Molecular Function: protein kinase activity (GO:0004672);; Biological Process: response to osmotic stress (GO:0006970);; Biological Process: abscisic acid-activated signaling pathway (GO:0009738);; Cellular Component: intracellular part (GO:0044424);;	K14498|1.9111e-53|aly:ARALYDRAFT_920030|hypothetical protein; K14498 serine/threonine-protein kinase SRK2 [EC:2.7.11.1] (A)	[T]	Signal transduction mechanisms	--	Serine/threonine-protein kinase SRK2E GN=F17I5.140 OS=Arabidopsis thaliana (Mouse-ear cress) PE=1 SV=1	T	Signal transduction mechanisms	PREDICTED: serine/threonine-protein kinase SRK2E-like [Nicotiana sylvestris]
F01_c14304/f1p41/1284	[G]	Carbohydrate transport and metabolism	Molecular Function: transporter activity (GO:0005215);; Cellular Component: mitochondrion (GO:0005739);; Cellular Component: vacuole (GO:0005773);; Biological Process: water transport (GO:0006833);; Biological Process: response to water deprivation (GO:0009414);; Biological Process: response to salt stress (GO:0009651);; Cellular Component: chloroplast envelope (GO:0009941);; Cellular Component: …	K09872|0|mus:104000197|probable aquaporin PIP1-2; K09872 aquaporin PIP (A)	[G]	Carbohydrate transport and metabolism	Major intrinsic protein	Probable aquaporin PIP1-2 OS=Oryza sativa subsp. japonica (Rice) PE=2 SV=3	G	Carbohydrate transport and metabolism	PREDICTED: probable aquaporin PIP1-2 [Musa acuminata subsp. malaccensis]
F01_c5761/f1p4/2298	--	--	--	--	--	--	NB-ARC domain;; NACHT domain	TMV resistance protein N GN=N OS=Nicotiana glutinosa (Tobacco) PE=1 SV=1	S	Function unknown	PREDICTED: TMV resistance protein N-like [Populus euphratica]
F01_c5331/f6p1/1502	[R]	General function prediction only	Molecular Function: ATP binding (GO:0005524);; Molecular Function: glycerate kinase activity (GO:0008887);; Cellular Component: chloroplast stroma (GO:0009570);; Biological Process: photorespiration (GO:0009853);; Cellular Component: chloroplast envelope (GO:0009941);; Biological Process: phosphorylation (GO:0016310);;	K15918|0|tcc:TCM_028593|P-loop containing nucleoside triphosphate hydrolases superfamily protein; K15918 D-glycerate 3-kinase [EC:2.7.1.31] (A)	[R]	General function prediction only	--	D-glycerate 3-kinase, chloroplastic (Precursor) GN=GLYK OS=Arabidopsis thaliana (Mouse-ear cress) PE=1 SV=2	G	Carbohydrate transport and metabolism	PREDICTED: D-glycerate 3-kinase, chloroplastic-like [Populus euphratica]
F01_c7080/f1p1/2705	--	--	--	--	--	--	--	WEB family protein At3g02930, chloroplastic (Precursor) GN=At3g02930 OS=Arabidopsis thaliana (Mouse-ear cress) PE=2 SV=1	S	Function unknown	hypothetical protein L484_019794 [Morus notabilis]
F01_c17061/f1p1/1314	--	--	Molecular Function: ubiquitin-protein transferase activity (GO:0004842);; Biological Process: ubiquitin-dependent protein catabolic process (GO:0006511);; Biological Process: response to abscisic acid (GO:0009737);; Biological Process: posttranscriptional regulation of gene expression (GO:0010608);; Biological Process: negative regulation of gene expression (GO:0010629);; Biological Process: prot…	--	[R]	General function prediction only	Leucine Rich repeat	F-box protein FBW2 GN=T3H13.1 OS=Arabidopsis thaliana (Mouse-ear cress) PE=1 SV=1	R	General function prediction only	unnamed protein product [Vitis vinifera]
F01_c8848/f1p0/3470	--	--	Molecular Function: DNA binding (GO:0003677);; Biological Process: RNA modification (GO:0009451);;	--	[R]	General function prediction only	PPR repeat	Putative pentatricopeptide repeat-containing protein At5g09950 GN=PCMP-H35 OS=Arabidopsis thaliana (Mouse-ear cress) PE=3 SV=1	R	General function prediction only	pentatricopeptide (PPR) repeat protein, partial [Medicago truncatula]
F01_c8859/f1p0/2260	--	--	--	--	--	--	--	Polyadenylate-binding protein-interacting protein 3 GN=CID3 OS=Arabidopsis thaliana (Mouse-ear cress) PE=2 SV=1	S	Function unknown	hypothetical protein VITISV_016662 [Vitis vinifera]
F01_c10446/f1p8/1515	[R]	General function prediction only	Molecular Function: nucleotide binding (GO:0000166);; Biological Process: mRNA splicing, via spliceosome (GO:0000398);; Molecular Function: RNA binding (GO:0003723);; Molecular Function: protein binding (GO:0005515);; Cellular Component: nucleolus (GO:0005730);; Biological Process: sugar mediated signaling pathway (GO:0010182);; Cellular Component: nuclear speck (GO:0016607);;	K14325|2.70926e-52|vvi:100267894|serine/arginine-rich splicing factor SR45; K14325 RNA-binding protein with serine-rich domain 1 (A)	[R]	General function prediction only	RNA recognition motif. (a.k.a. RRM, RBD, or RNP domain);; RNA recognition motif (a.k.a. RRM, RBD, or RNP domain);; RNA recognition motif. (a.k.a. RRM, RBD, or RNP domain)	Serine/arginine-rich splicing factor SR45 GN=F19K19.9 OS=Arabidopsis thaliana (Mouse-ear cress) PE=1 SV=1	A	RNA processing and modification	PREDICTED: serine/arginine-rich splicing factor SR45 [Vitis vinifera]
F01_c12677/f1p2/1241	--	--	--	--	--	--	--	DAG protein, chloroplastic (Precursor) GN=DAG OS=Antirrhinum majus (Garden snapdragon) PE=2 SV=1	S	Function unknown	PREDICTED: uncharacterized protein At3g15000, mitochondrial-like [Pyrus x bretschneideri]
F01_c2812/f2p0/1639	--	--	--	--	--	--	Plant protein of unknown function	UPF0481 protein At3g47200 GN=At3g47200 OS=Arabidopsis thaliana (Mouse-ear cress) PE=2 SV=1	S	Function unknown	PREDICTED: UPF0481 protein At3g47200-like [Vitis vinifera]
F01_c15741/f1p8/2217	--	--	Molecular Function: calcium ion binding (GO:0005509);;	--	[TU]	--	EF-hand domain pair;; EF hand;; EF hand	--	834	EF hand family protein	hypothetical protein VITISV_043723 [Vitis vinifera]
F01_c5303/f1p1/2040	--	--	--	K11843|6.16774e-61|tcc:TCM_028999|Ubiquitin-specific protease 6; K11843 ubiquitin carboxyl-terminal hydrolase 14 [EC:3.4.19.12] (A)	[O]	Posttranslational modification, protein turnover, chaperones	Ubiquitin carboxyl-terminal hydrolase	Ubiquitin carboxyl-terminal hydrolase 6 GN=UBP6 OS=Arabidopsis thaliana (Mouse-ear cress) PE=1 SV=1	O	Posttranslational modification, protein turnover, chaperones	Ubiquitin-specific protease 6 [Theobroma cacao]
F01_c8666/f1p27/1601	--	--	Cellular Component: mitochondrion (GO:0005739);;	--	--	--	--	Uncharacterized mitochondrial protein AtMg00030 GN=AtMg00030 OS=Arabidopsis thaliana (Mouse-ear cress) PE=4 SV=1	S	Function unknown	hypothetical protein M569_00042, partial [Genlisea aurea]
F01_c10841/f1p1/3284	--	--	Molecular Function: metal ion binding (GO:0046872);;	--	--	--	Zinc finger C-x8-C-x5-C-x3-H type (and similar)	Zinc finger CCCH domain-containing protein 38 GN=At3g18640 OS=Arabidopsis thaliana (Mouse-ear cress) PE=2 SV=1	R	General function prediction only	hypothetical protein PRUPE_ppa001169mg [Prunus persica]
F01_c18115/f2p16/1388	--	--	--	--	[S]	Function unknown	Uncharacterised conserved protein (DUF2359)	--	S	Function unknown	Uncharacterized protein TCM_019149 [Theobroma cacao]
F01_c1136/f1p13/938	[J]	Translation, ribosomal structure and biogenesis	Molecular Function: nucleotide binding (GO:0000166);; Molecular Function: RNA binding (GO:0003723);; Molecular Function: structural constituent of ribosome (GO:0003735);; Cellular Component: mitochondrion (GO:0005739);; Biological Process: translation (GO:0006412);; Cellular Component: chloroplast (GO:0009507);; Cellular Component: large ribosomal subunit (GO:0015934);; Molecular Function: transf…	K02886|9.44632e-62|csv:101228539|50S ribosomal protein L2, chloroplastic-like; K02886 large subunit ribosomal protein L2 (A)	[J]	Translation, ribosomal structure and biogenesis	Ribosomal Proteins L2, RNA binding domain	50S ribosomal protein L2, chloroplastic GN=rpl2-B OS=Panax ginseng (Korean ginseng) PE=3 SV=1	J	Translation, ribosomal structure and biogenesis	hypothetical protein NitaMp011 [Nicotiana tabacum]
F01_c17156/f1p2/1261	[E]	Amino acid transport and metabolism	Biological Process: tryptophan biosynthetic process (GO:0000162);; Molecular Function: double-stranded telomeric DNA binding (GO:0003691);; Molecular Function: anthranilate phosphoribosyltransferase activity (GO:0004048);; Molecular Function: protein binding (GO:0005515);; Cellular Component: plasma membrane (GO:0005886);; Biological Process: tryptophan catabolic process (GO:0006569);; Cellular C…	K00766|2.23885e-158|vvi:100255305|anthranilate phosphoribosyltransferase, chloroplastic; K00766 anthranilate phosphoribosyltransferase [EC:2.4.2.18] (A)	[E]	Amino acid transport and metabolism	Glycosyl transferase family, a/b domain;; Glycosyl transferase family, helical bundle domain	Anthranilate phosphoribosyltransferase, chloroplastic (Precursor) GN=PAT1 OS=Arabidopsis thaliana (Mouse-ear cress) PE=2 SV=1	E	Amino acid transport and metabolism	PREDICTED: anthranilate phosphoribosyltransferase, chloroplastic [Vitis vinifera]
F01_c2420/f2p4/2514	--	--	--	K14514|1.77581e-180|vvi:100250496|ETHYLENE INSENSITIVE 3-like 1 protein; K14514 ethylene-insensitive protein 3 (A)	--	--	Ethylene insensitive 3	ETHYLENE INSENSITIVE 3-like 1 protein GN=EIL1 OS=Arabidopsis thaliana (Mouse-ear cress) PE=1 SV=1	K	Transcription	ethylene insensitive 3-like 3 protein [Paeonia suffruticosa]
F01_c4455/f1p8/2278	[R]	General function prediction only	Molecular Function: adenyl nucleotide binding (GO:0030554);;	--	--	--	PB1 domain;; CBS domain	CBS domain-containing protein CBSCBSPB3 GN=CBSCBSPB3 OS=Arabidopsis thaliana (Mouse-ear cress) PE=1 SV=1	S	Function unknown	hypothetical protein AMTR_s00017p00156440 [Amborella trichopoda]
F01_c5728/f1p3/3855	--	--	Molecular Function: metal ion binding (GO:0046872);;	--	[O]	Posttranslational modification, protein turnover, chaperones	Ring finger domain;; RING-H2 zinc finger;; Zinc finger, C3HC4 type (RING finger);; Zinc finger, C3HC4 type (RING finger)	E3 ubiquitin-protein ligase MBR2 GN=MBR2 OS=Arabidopsis thaliana (Mouse-ear cress) PE=1 SV=1	O	Posttranslational modification, protein turnover, chaperones	PREDICTED: probable E3 ubiquitin-protein ligase HIP1 [Vitis vinifera]
F01_c5266/f1p1/2185	[Q]	Secondary metabolites biosynthesis, transport and catabolism	Molecular Function: copper ion binding (GO:0005507);; Cellular Component: plasma membrane (GO:0005886);; Molecular Function: L-ascorbate oxidase activity (GO:0008447);; Cellular Component: plasmodesma (GO:0009506);; Biological Process: oxidation-reduction process (GO:0055114);;	--	[Q]	Secondary metabolites biosynthesis, transport and catabolism	Multicopper oxidase;; Multicopper oxidase;; Multicopper oxidase	Monocopper oxidase-like protein SKU5 (Precursor) GN=SKU5 OS=Arabidopsis thaliana (Mouse-ear cress) PE=1 SV=1	Q	Secondary metabolites biosynthesis, transport and catabolism	SKU5 similar 3 [Theobroma cacao]
F01_c3930/f1p0/2217	[I]	Lipid transport and metabolism	Molecular Function: hydrolase activity (GO:0016787);;	--	[T]	Signal transduction mechanisms	Carboxylesterase family	--	R	General function prediction only	alpha/beta-hydrolase [Aureobasidium pullulans var. namibiae CBS 147.97]
F01_c6589/f1p13/1160	--	--	Cellular Component: chloroplast (GO:0009507);;	--	--	--	Chloroplast protein precursor Ycf15 putative	Putative uncharacterized protein ycf15 GN=ycf15-B OS=Nandina domestica (Heavenly bamboo) PE=5 SV=1	S	Function unknown	Ycf15 [Paeonia brownii]
F01_c16246/f1p5/3592	[L]	Replication, recombination and repair	--	K03654|0|pxb:103967545|Werner syndrome ATP-dependent helicase-like; K03654 ATP-dependent DNA helicase RecQ [EC:3.6.4.12] (A)	[L]	Replication, recombination and repair	HRDC domain;; DEAD/DEAH box helicase;; Helix-turn-helix domain;; Helicase conserved C-terminal domain;; RQC domain;; Type III restriction enzyme, res subunit	Mediator of RNA polymerase II transcription subunit 34 GN=At1g31360 OS=Arabidopsis thaliana (Mouse-ear cress) PE=1 SV=1	A	RNA processing and modification	PREDICTED: Werner syndrome ATP-dependent helicase-like [Pyrus x bretschneideri]
F01_c6076/f1p0/1068	--	--	--	--	--	--	--	--	S	Function unknown	PREDICTED: uncharacterized protein LOC104589883 [Nelumbo nucifera]
F01_c1604/f13p10/4372	[V]	Defense mechanisms	Molecular Function: ATP binding (GO:0005524);; Biological Process: ATP catabolic process (GO:0006200);; Molecular Function: xenobiotic-transporting ATPase activity (GO:0008559);; Molecular Function: taurine-transporting ATPase activity (GO:0015411);; Cellular Component: integral component of membrane (GO:0016021);; Biological Process: transmembrane transport (GO:0055085);;	K05658|0|vvi:100253815|ABC transporter B family member 9-like; K05658 ATP-binding cassette, subfamily B (MDR/TAP), member 1 [EC:3.6.3.44] (A)	[Q]	Secondary metabolites biosynthesis, transport and catabolism	ABC transporter transmembrane region;; ABC transporter;; AAA domain;; RecF/RecN/SMC N terminal domain;; AAA ATPase domain;; Predicted ATPase of the ABC class;; P-loop containing region of AAA domain;; Putative exonuclease SbcCD, C subunit;; Protein of unknown function, DUF258;; AAA domain;; Zeta toxin;; Molybdopterin guanine dinucleotide synthesis protein B;; Protein of unknown function (DUF815)	ABC transporter B family member 9 GN=F15J5.20 OS=Arabidopsis thaliana (Mouse-ear cress) PE=3 SV=2	Q	Secondary metabolites biosynthesis, transport and catabolism	PREDICTED: ABC transporter B family member 9-like isoform X1 [Vitis vinifera]
F01_c15931/f1p8/1284	--	--	Cellular Component: chloroplast (GO:0009507);; Biological Process: photosynthesis, light harvesting (GO:0009765);; Cellular Component: membrane (GO:0016020);; Molecular Function: metal ion binding (GO:0046872);;	K08915|6.81596e-127|pxb:103966344|chlorophyll a-b binding protein CP29.1, chloroplastic; K08915 light-harvesting complex II chlorophyll a/b binding protein 4 (A)	--	--	Chlorophyll A-B binding protein	--	G	Carbohydrate transport and metabolism	PREDICTED: chlorophyll a-b binding protein CP29.2, chloroplastic [Nelumbo nucifera]
F01_c15886/f2p0/2724	[O]	Posttranslational modification, protein turnover, chaperones	Biological Process: cellular process (GO:0009987);; Biological Process: primary metabolic process (GO:0044238);; Biological Process: organic substance metabolic process (GO:0071704);;	K09496|1.02084e-22|pop:POPTR_0012s04860g|POPTRDRAFT_661718; chaperonin family protein; K09496 T-complex protein 1 subunit delta (A)	[O]	Posttranslational modification, protein turnover, chaperones	--	T-complex protein 1 subunit delta {ECO:0000303|PubMed:11599560} GN=MRC8 OS=Arabidopsis thaliana (Mouse-ear cress) PE=1 SV=1	O	Posttranslational modification, protein turnover, chaperones	PREDICTED: T-complex protein 1 subunit delta-like [Nelumbo nucifera]
F01_c2209/f2p1/1407	--	--	Biological Process: response to organic substance (GO:0010033);; Molecular Function: hydrolase activity, acting on ester bonds (GO:0016788);; Biological Process: response to other organism (GO:0051707);;	--	--	--	GDSL-like Lipase/Acylhydrolase	GDSL esterase/lipase 1 (Precursor) GN=GLIP1 OS=Arabidopsis thaliana (Mouse-ear cress) PE=1 SV=1	I	Lipid transport and metabolism	PREDICTED: GDSL esterase/lipase 4-like [Eucalyptus grandis]
F01_c10548/f1p11/3460	[L]	Replication, recombination and repair	Molecular Function: DNA binding (GO:0003677);; Molecular Function: nuclease activity (GO:0004518);; Biological Process: DNA repair (GO:0006281);; Biological Process: response to abiotic stimulus (GO:0009628);;	K10846|0|vvi:100245663|DNA repair protein UVH3; K10846 DNA excision repair protein ERCC-5 (A)	[L]	Replication, recombination and repair	XPG I-region;; XPG N-terminal domain	DNA repair protein UVH3 GN=MMG15.7 OS=Arabidopsis thaliana (Mouse-ear cress) PE=2 SV=1	L	Replication, recombination and repair	PREDICTED: DNA repair protein UVH3 isoform X1 [Vitis vinifera]
F01_c7921/f1p4/2124	[M]	Cell wall/membrane/envelope biogenesis	Cellular Component: membrane (GO:0016020);; Molecular Function: transferase activity, transferring glycosyl groups (GO:0016757);; Cellular Component: cell part (GO:0044464);;	--	--	--	Cellulose synthase	Cellulose synthase-like protein E6 GN=P0556A05.32 OS=Oryza sativa subsp. japonica (Rice) PE=2 SV=1	S	Function unknown	PREDICTED: cellulose synthase-like protein E6 [Vitis vinifera]
F01_c4542/f1p1/1397	--	--	--	--	[S]	Function unknown	Eukaryotic protein of unknown function (DUF829)	--	S	Function unknown	PREDICTED: uncharacterized protein LOC103436514 [Malus domestica]
F01_c15634/f1p0/2057	--	--	--	--	--	--	PMR5 N terminal Domain	Protein trichome birefringence-like 1 GN=TBL1 OS=Arabidopsis thaliana (Mouse-ear cress) PE=2 SV=1	S	Function unknown	hypothetical protein PRUPE_ppa002919mg [Prunus persica]
F01_c2291/f7p11/3566	[O]	Posttranslational modification, protein turnover, chaperones	--	--	[O]	Posttranslational modification, protein turnover, chaperones	ATPase family associated with various cellular activities (AAA);; IstB-like ATP binding protein;; Holliday junction DNA helicase ruvB N-terminus	Katanin p60 ATPase-containing subunit A1 {ECO:0000255|HAMAP-Rule:MF_03023} GN=At1g80350 OS=Arabidopsis thaliana (Mouse-ear cress) PE=1 SV=1	O	Posttranslational modification, protein turnover, chaperones	PREDICTED: uncharacterized protein LOC100252512 isoform X4 [Vitis vinifera]
F01_c9120/f1p1/2069	--	--	--	--	--	--	Plant organelle RNA recognition domain	Protein ROOT PRIMORDIUM DEFECTIVE 1 GN=RPD1 OS=Arabidopsis thaliana (Mouse-ear cress) PE=1 SV=1	S	Function unknown	unnamed protein product [Vitis vinifera]
F01_c4852/f1p0/2201	--	--	Cellular Component: intracellular part (GO:0044424);;	--	--	--	--	--	R	General function prediction only	hypothetical protein CICLE_v10004171mg [Citrus clementina]
F01_c17127/f1p0/3360	--	--	Molecular Function: sequence-specific DNA binding RNA polymerase II transcription factor activity (GO:0000981);; Cellular Component: nucleus (GO:0005634);; Biological Process: regulation of transcription from RNA polymerase II promoter (GO:0006357);; Molecular Function: zinc ion binding (GO:0008270);;	--	--	--	--	--	S	Function unknown	hypothetical protein COCHEDRAFT_1096115 [Bipolaris maydis C5]
F01_c7271/f1p2/1032	[F]	Nucleotide transport and metabolism	Molecular Function: cytidylate kinase activity (GO:0004127);; Molecular Function: ATP binding (GO:0005524);; Cellular Component: nucleus (GO:0005634);; Molecular Function: phosphotransferase activity, phosphate group as acceptor (GO:0016776);; Biological Process: nucleotide phosphorylation (GO:0046939);;	K13800|4.1058e-110|pop:POPTR_0002s13570g|POPTRDRAFT_551931; uridylate kinase family protein; K13800 UMP-CMP kinase [EC:2.7.4.- 2.7.4.14] (A)	[F]	Nucleotide transport and metabolism	Adenylate kinase	UMP-CMP kinase 3 {ECO:0000255|HAMAP-Rule:MF_03172} GN=T7I7.5 OS=Arabidopsis thaliana (Mouse-ear cress) PE=1 SV=1	F	Nucleotide transport and metabolism	hypothetical protein JCGZ_14686 [Jatropha curcas]
F01_c13354/f1p0/2069	--	--	--	K18749|1.59437e-37|pvu:PHAVU_003G025600g|hypothetical protein; K18749 protein LSM14 (A)	[U]	Intracellular trafficking, secretion, and vesicular transport	Scd6-like Sm domain	Protein decapping 5 GN=DCP5 OS=Arabidopsis thaliana (Mouse-ear cress) PE=1 SV=1	U	Intracellular trafficking, secretion, and vesicular transport	PREDICTED: protein decapping 5-like isoform X2 [Cicer arietinum]
F01_c16752/f1p0/1007	[IQR]	--	Molecular Function: 3-oxoacyl-[acyl-carrier-protein] reductase (NADPH) activity (GO:0004316);; Cellular Component: peroxisome (GO:0005777);; Cellular Component: membrane (GO:0016020);; Biological Process: response to cadmium ion (GO:0046686);; Biological Process: oxidation-reduction process (GO:0055114);;	--	[R]	General function prediction only	Enoyl-(Acyl carrier protein) reductase;; short chain dehydrogenase;; KR domain	3-oxoacyl-[acyl-carrier-protein] reductase, chloroplastic (Precursor) GN=CLKR27 OS=Cuphea lanceolata (Cigar flower) PE=2 SV=1	Q	Secondary metabolites biosynthesis, transport and catabolism	2,4-dienoyl-CoA reductase, putative [Ricinus communis]
F01_c11963/f2p1/1313	--	--	Molecular Function: metal ion binding (GO:0046872);;	--	[O]	Posttranslational modification, protein turnover, chaperones	Protein of unknown function (DUF1117);; zinc-finger;; Ring finger domain;; RING-H2 zinc finger;; Zinc finger, C3HC4 type (RING finger)	E3 ubiquitin-protein ligase RING1 GN=RING1 OS=Gossypium hirsutum (Upland cotton) PE=1 SV=1	O	Posttranslational modification, protein turnover, chaperones	PREDICTED: E3 ubiquitin-protein ligase RING1-like [Nelumbo nucifera]
F01_c10660/f1p1/3787	--	--	--	--	[R]	General function prediction only	--	--	R	General function prediction only	PREDICTED: uncharacterized protein LOC104706999 isoform X2 [Camelina sativa]
F01_c6064/f1p0/2023	[RTKL]	--	Molecular Function: protein serine/threonine kinase activity (GO:0004674);; Molecular Function: ATP binding (GO:0005524);; Biological Process: protein phosphorylation (GO:0006468);; Biological Process: chlorophyll catabolic process (GO:0015996);; Biological Process: regulation of photosynthesis, light reaction (GO:0042548);;	--	[R]	General function prediction only	Protein kinase domain;; Phosphotransferase enzyme family;; Protein tyrosine kinase	Serine/threonine-protein kinase STN7, chloroplastic (Precursor) GN=STN7 OS=Arabidopsis thaliana (Mouse-ear cress) PE=1 SV=1	T	Signal transduction mechanisms	PREDICTED: serine/threonine-protein kinase STN7, chloroplastic-like isoform X1 [Nelumbo nucifera]
F01_c13962/f2p5/3918	--	--	Molecular Function: carboxypeptidase activity (GO:0004180);; Cellular Component: vacuolar membrane (GO:0005774);; Cellular Component: endoplasmic reticulum (GO:0005783);; Cellular Component: Golgi apparatus (GO:0005794);; Biological Process: protein glycosylation (GO:0006486);; Biological Process: N-terminal protein myristoylation (GO:0006499);; Cellular Component: plant-type cell wall (GO:000950…	--	[O]	Posttranslational modification, protein turnover, chaperones	Carboxypeptidase regulatory-like domain;; Cna protein B-type domain	--	O	Posttranslational modification, protein turnover, chaperones	PREDICTED: nodal modulator 1 [Vitis vinifera]
F01_c8562/f1p1/2780	--	--	--	--	[U]	Intracellular trafficking, secretion, and vesicular transport	Domain of unknown function (DUF4283);; Zinc knuckle	--	U	Intracellular trafficking, secretion, and vesicular transport	PREDICTED: uncharacterized protein LOC103933633 [Pyrus x bretschneideri]
F01_c9696/f1p1/1460	--	--	Molecular Function: nucleoside transmembrane transporter activity (GO:0005337);; Biological Process: transport (GO:0006810);; Cellular Component: integral component of membrane (GO:0016021);;	K15014|0|pop:POPTR_0019s14090g|POPTRDRAFT_250534; hypothetical protein; K15014 solute carrier family 29 (equilibrative nucleoside transporter), member 1/2/3 (A)	[F]	Nucleotide transport and metabolism	Nucleoside transporter	Equilibrative nucleotide transporter 3 OS=Arabidopsis thaliana (Mouse-ear cress) PE=1 SV=1	P	Inorganic ion transport and metabolism	PREDICTED: equilibrative nucleotide transporter 3-like [Eucalyptus grandis]
F01_c15499/f1p2/1371	[H]	Coenzyme transport and metabolism	Molecular Function: adenosylhomocysteinase activity (GO:0004013);; Biological Process: one-carbon metabolic process (GO:0006730);; Biological Process: response to stress (GO:0006950);;	K01251|0|vvi:100253872|adenosylhomocysteinase-like; K01251 adenosylhomocysteinase [EC:3.3.1.1] (A)	[H]	Coenzyme transport and metabolism	S-adenosyl-L-homocysteine hydrolase, NAD binding domain;; S-adenosyl-L-homocysteine hydrolase;; D-isomer specific 2-hydroxyacid dehydrogenase, NAD binding domain;; Acetohydroxy acid isomeroreductase, catalytic domain;; Tetrahydrofolate dehydrogenase/cyclohydrolase, NAD(P)-binding domain	Adenosylhomocysteinase GN=SAHH OS=Nicotiana tabacum (Common tobacco) PE=2 SV=1	H	Coenzyme transport and metabolism	PREDICTED: adenosylhomocysteinase-like [Nicotiana sylvestris]
F01_c16367/f1p0/1049	[S]	Function unknown	--	--	--	--	--	Uncharacterized protein At5g50100, mitochondrial (Precursor) GN=At5g50100 OS=Arabidopsis thaliana (Mouse-ear cress) PE=2 SV=1	S	Function unknown	hypothetical protein JCGZ_11518 [Jatropha curcas]
F01_c8516/f1p1/2241	--	--	Molecular Function: sequence-specific DNA binding transcription factor activity (GO:0003700);; Biological Process: regulation of transcription, DNA-templated (GO:0006355);; Biological Process: epidermal cell fate specification (GO:0009957);; Biological Process: seed coat development (GO:0010214);; Molecular Function: sequence-specific DNA binding (GO:0043565);;	--	--	--	WRKY DNA -binding domain	WRKY transcription factor 44 GN=F3G5.5 OS=Arabidopsis thaliana (Mouse-ear cress) PE=1 SV=2	K	Transcription	PREDICTED: WRKY transcription factor 44-like isoform X1 [Eucalyptus grandis]
F01_c466/f1p0/951	--	--	--	K14496|6.13781e-39|fve:101304013|abscisic acid receptor PYL4-like; K14496 abscisic acid receptor PYR/PYL family (A)	--	--	--	Abscisic acid receptor PYL4 GN=T19C21.20 OS=Arabidopsis thaliana (Mouse-ear cress) PE=1 SV=1	R	General function prediction only	PREDICTED: abscisic acid receptor PYL4-like [Nicotiana tomentosiformis]
F01_c18190/f2p2/4285	--	--	Molecular Function: structural molecule activity (GO:0005198);; Biological Process: intracellular protein transport (GO:0006886);; Biological Process: vesicle-mediated transport (GO:0016192);; Cellular Component: clathrin coat of trans-Golgi network vesicle (GO:0030130);; Cellular Component: clathrin coat of coated pit (GO:0030132);;	K04646|0|vvi:100256972|clathrin heavy chain 1-like; K04646 clathrin heavy chain (A)	[U]	Intracellular trafficking, secretion, and vesicular transport	Clathrin-H-link	Clathrin heavy chain 2 OS=Oryza sativa subsp. japonica (Rice) PE=3 SV=1	U	Intracellular trafficking, secretion, and vesicular transport	hypothetical protein CISIN_1g000428mg [Citrus sinensis]
F01_c9545/f2p1/1725	--	--	Biological Process: carbohydrate metabolic process (GO:0005975);; Molecular Function: glucan endo-1,3-beta-D-glucosidase activity (GO:0042973);;	--	--	--	Glycosyl hydrolases family 17;; X8 domain	Glucan endo-1,3-beta-glucosidase 7 (Precursor) GN=At4g34480 OS=Arabidopsis thaliana (Mouse-ear cress) PE=1 SV=2	R	General function prediction only	PREDICTED: glucan endo-1,3-beta-D-glucosidase isoform X1 [Vitis vinifera]
F01_c3763/f2p6/3875	[J]	Translation, ribosomal structure and biogenesis	Molecular Function: DNA binding (GO:0003677);; Molecular Function: DNA-directed RNA polymerase activity (GO:0003899);; Biological Process: transcription, DNA-templated (GO:0006351);; Cellular Component: chloroplast (GO:0009507);;	K03046|0|vvi:4025097|rpoC2, ViviCp011; RNA polymerase beta'' chain; K03046 DNA-directed RNA polymerase subunit beta' [EC:2.7.7.6] (A)	--	--	ATP synthase A chain	DNA-directed RNA polymerase subunit beta&apos;&apos; {ECO:0000255|HAMAP-Rule:MF_01324} OS=Panax ginseng (Korean ginseng) PE=3 SV=1	K	Transcription	DNA-directed RNA polymerase beta&apos;&apos; chain (chloroplast) [Paeonia sp. Sd0052]
F01_c4964/f1p5/1462	[G]	Carbohydrate transport and metabolism	Molecular Function: adenosine kinase activity (GO:0004001);; Molecular Function: copper ion binding (GO:0005507);; Cellular Component: plasma membrane (GO:0005886);; Biological Process: purine ribonucleoside salvage (GO:0006166);; Biological Process: AMP biosynthetic process (GO:0006167);; Cellular Component: chloroplast (GO:0009507);; Biological Process: phosphorylation (GO:0016310);; Molecular …	K00856|0|tcc:TCM_043180|Adenosine kinase 2; K00856 adenosine kinase [EC:2.7.1.20] (A)	[G]	Carbohydrate transport and metabolism	pfkB family carbohydrate kinase	Adenosine kinase 2 GN=ADK2 OS=Arabidopsis thaliana (Mouse-ear cress) PE=1 SV=1	F	Nucleotide transport and metabolism	Adenosine kinase 2 [Theobroma cacao]
F01_c8591/f3p7/4209	--	--	--	--	--	--	Frigida-like protein	FRIGIDA-like protein 5 GN=FRL5 OS=Arabidopsis thaliana (Mouse-ear cress) PE=2 SV=1	S	Function unknown	Uncharacterized protein isoform 1 [Theobroma cacao]
F01_c944/f1p1/927	--	--	--	--	--	--	--	--	S	Function unknown	PREDICTED: uncharacterized protein LOC104087231 [Nicotiana tomentosiformis]
F01_c17183/f1p1/3831	--	--	--	--	[R]	General function prediction only	PPR repeat family;; PPR repeat	Pentatricopeptide repeat-containing protein At5g65560 GN=At5g65560 OS=Arabidopsis thaliana (Mouse-ear cress) PE=2 SV=1	R	General function prediction only	PREDICTED: pentatricopeptide repeat-containing protein At5g65560 [Vitis vinifera]
F01_c10233/f1p1/2372	--	--	Cellular Component: mitochondrion (GO:0005739);; Cellular Component: plasma membrane (GO:0005886);; Cellular Component: integral component of membrane (GO:0016021);;	--	--	--	--	Uncharacterized tatC-like protein ymf16 GN=YMF16 OS=Arabidopsis thaliana (Mouse-ear cress) PE=2 SV=2	S	Function unknown	Sec-independent protein translocase, partial (mitochondrion) [Ricinus communis]
F01_c7395/f1p31/2173	[E]	Amino acid transport and metabolism	Cellular Component: cytoplasm (GO:0005737);; Biological Process: L-phenylalanine catabolic process (GO:0006559);; Biological Process: cinnamic acid biosynthetic process (GO:0009800);; Molecular Function: phenylalanine ammonia-lyase activity (GO:0045548);;	K10775|0|rcu:RCOM_0262230|Phenylalanine ammonia-lyase, putative (EC:4.3.1.24); K10775 phenylalanine ammonia-lyase [EC:4.3.1.24] (A)	[Q]	Secondary metabolites biosynthesis, transport and catabolism	Aromatic amino acid lyase	Phenylalanine ammonia-lyase GN=PAL OS=Camellia sinensis (Tea) PE=2 SV=1	Q	Secondary metabolites biosynthesis, transport and catabolism	phenylalanine ammonia-lyase [Paeonia lactiflora]
F01_c9839/f2p0/2496	[V]	Defense mechanisms	Molecular Function: ATP binding (GO:0005524);; Biological Process: ATP catabolic process (GO:0006200);; Cellular Component: chloroplast envelope (GO:0009941);; Cellular Component: membrane (GO:0016020);; Molecular Function: ATPase activity, coupled to transmembrane movement of substances (GO:0042626);;	--	[Q]	Secondary metabolites biosynthesis, transport and catabolism	ABC-2 type transporter;; ABC transporter;; AAA domain	ABC transporter G family member 7 GN=F10A8.20 OS=Arabidopsis thaliana (Mouse-ear cress) PE=2 SV=1	Q	Secondary metabolites biosynthesis, transport and catabolism	PREDICTED: ABC transporter G family member 7 isoform X1 [Vitis vinifera]
F01_c2581/f2p1/3472	--	--	--	K12126|0|vvi:100247781|transcription factor PIF3-like; K12126 phytochrome-interacting factor 3 (A)	--	--	Helix-loop-helix DNA-binding domain	Transcription factor PIF3 GN=F14J9.19 OS=Arabidopsis thaliana (Mouse-ear cress) PE=1 SV=1	K	Transcription	PREDICTED: transcription factor PIF3-like isoform X2 [Vitis vinifera]
F01_c17325/f2p0/3632	[D]	Cell cycle control, cell division, chromosome partitioning	Biological Process: double-strand break repair via homologous recombination (GO:0000724);; Molecular Function: ATP binding (GO:0005524);; Cellular Component: Smc5-Smc6 complex (GO:0030915);; Biological Process: chromosome organization (GO:0051276);;	--	[L]	Replication, recombination and repair	AAA domain;; RecF/RecN/SMC N terminal domain	Structural maintenance of chromosomes protein 6B GN=MCI2.2 OS=Arabidopsis thaliana (Mouse-ear cress) PE=2 SV=1	L	Replication, recombination and repair	PREDICTED: structural maintenance of chromosomes protein 6B-like [Vitis vinifera]
F01_c16129/f1p1/1036	[R]	General function prediction only	Molecular Function: GTP binding (GO:0005525);; Cellular Component: cytosol (GO:0005829);; Cellular Component: plasma membrane (GO:0005886);; Biological Process: small GTPase mediated signal transduction (GO:0007264);; Biological Process: protein transport (GO:0015031);; Molecular Function: hydrolase activity (GO:0016787);;	K07901|7.7453e-115|vvi:100243217|ras-related protein RABE1c; K07901 Ras-related protein Rab-8A (A)	[TU]	--	Ras family;; Miro-like protein;; ADP-ribosylation factor family;; Elongation factor Tu GTP binding domain;; Gtr1/RagA G protein conserved region;; 50S ribosome-binding GTPase	Ras-related protein RABE1c GN=F12M12.30 OS=Arabidopsis thaliana (Mouse-ear cress) PE=1 SV=1	U	Intracellular trafficking, secretion, and vesicular transport	PREDICTED: ras-related protein RABE1c [Vitis vinifera]
F01_c6386/f3p8/2140	--	--	Cellular Component: integral component of membrane (GO:0016021);;	K17087|0|pxb:103940370|transmembrane 9 superfamily member 3-like; K17087 transmembrane 9 superfamily member 3 (A)	[U]	Intracellular trafficking, secretion, and vesicular transport	Endomembrane protein 70	Transmembrane 9 superfamily member 1 {ECO:0000305} (Precursor) OS=Arabidopsis thaliana (Mouse-ear cress) PE=1 SV=1	U	Intracellular trafficking, secretion, and vesicular transport	PREDICTED: transmembrane 9 superfamily member 3-like [Pyrus x bretschneideri]
F01_c5076/f1p4/2132	--	--	--	--	[TZ]	--	--	Formin-like protein 4 (Precursor) GN=FH4 OS=Arabidopsis thaliana (Mouse-ear cress) PE=1 SV=2	S	Function unknown	PREDICTED: formin-like protein 4 [Vitis vinifera]
F01_c10511/f1p4/4382	--	--	--	--	[S]	Function unknown	--	--	S	Function unknown	putative RNA-directed DNA polymerase (Reverse transcriptase) [Malus domestica]
F01_c5296/f1p3/2513	[P]	Inorganic ion transport and metabolism	Cellular Component: integral component of membrane (GO:0016021);; Biological Process: transmembrane transport (GO:0055085);;	K13754|0|vvi:100256701|cation/calcium exchanger 4; K13754 solute carrier family 24 (sodium/potassium/calcium exchanger), member 6 (A)	[P]	Inorganic ion transport and metabolism	Sodium/calcium exchanger protein	Cation/calcium exchanger 4 GN=F15I1.21 OS=Arabidopsis thaliana (Mouse-ear cress) PE=2 SV=1	P	Inorganic ion transport and metabolism	hypothetical protein VITISV_014204 [Vitis vinifera]
F01_c21510/f3p7/3353	--	--	Molecular Function: GTPase activity (GO:0003924);; Molecular Function: signal transducer activity (GO:0004871);; Molecular Function: GTP binding (GO:0005525);; Biological Process: GTP catabolic process (GO:0006184);; Biological Process: G-protein coupled receptor signaling pathway (GO:0007186);; Molecular Function: G-protein beta/gamma-subunit complex binding (GO:0031683);;	--	[DT]	--	G-protein alpha subunit	Extra-large guanine nucleotide-binding protein 1 GN=F26B6.11 OS=Arabidopsis thaliana (Mouse-ear cress) PE=1 SV=2	3697	G_alpha	PREDICTED: extra-large guanine nucleotide-binding protein 1 [Vitis vinifera]
F01_c2514/f2p6/3674	--	--	--	--	[R]	General function prediction only	DnaJ domain	Auxilin-related protein 1 GN=At4g12780 OS=Arabidopsis thaliana (Mouse-ear cress) PE=1 SV=2	O	Posttranslational modification, protein turnover, chaperones	Chaperone DnaJ-domain superfamily protein, putative isoform 1 [Theobroma cacao]
F01_c17302/f1p0/1040	--	--	--	--	[R]	General function prediction only	PPR repeat family;; PPR repeat;; PPR repeat;; Pentatricopeptide repeat domain	Pentatricopeptide repeat-containing protein At4g20090 GN=EMB1025 OS=Arabidopsis thaliana (Mouse-ear cress) PE=3 SV=1	S	Function unknown	PREDICTED: pentatricopeptide repeat-containing protein At3g53700, chloroplastic-like [Nelumbo nucifera]
F01_c8525/f1p8/2417	--	--	Molecular Function: translation initiation factor activity (GO:0003743);; Biological Process: translational initiation (GO:0006413);; Biological Process: petal development (GO:0048441);; Biological Process: stamen development (GO:0048443);; Biological Process: ovule development (GO:0048481);;	K11593|0|vvi:100258447|protein argonaute 5; K11593 eukaryotic translation initiation factor 2C (A)	[J]	Translation, ribosomal structure and biogenesis	Piwi domain;; PAZ domain;; Domain of unknown function (DUF1785)	Protein argonaute MEL1 GN=OSJNBa0052F07.11 OS=Oryza sativa subsp. japonica (Rice) PE=2 SV=1	J	Translation, ribosomal structure and biogenesis	PREDICTED: protein argonaute 5 [Vitis vinifera]
F01_c4500/f1p4/2734	[G]	Carbohydrate transport and metabolism	Cellular Component: cytosol (GO:0005829);; Molecular Function: glycogen phosphorylase activity (GO:0008184);; Biological Process: response to water deprivation (GO:0009414);; Cellular Component: chloroplast (GO:0009507);; Biological Process: starch biosynthetic process (GO:0019252);; Molecular Function: pyridoxal phosphate binding (GO:0030170);; Biological Process: response to cadmium ion (GO:004…	K00688|0|vvi:100251865|alpha-glucan phosphorylase, H isozyme; K00688 starch phosphorylase [EC:2.4.1.1] (A)	[G]	Carbohydrate transport and metabolism	Carbohydrate phosphorylase	Alpha-glucan phosphorylase, H isozyme OS=Solanum tuberosum (Potato) PE=1 SV=1	G	Carbohydrate transport and metabolism	PREDICTED: alpha-glucan phosphorylase, H isozyme [Beta vulgaris subsp. vulgaris]
F01_c837/f1p6/1113	[IQR]	--	Molecular Function: androstan-3-alpha,17-beta-diol dehydrogenase activity (GO:0047044);; Biological Process: oxidation-reduction process (GO:0055114);;	--	[R]	General function prediction only	Enoyl-(Acyl carrier protein) reductase;; short chain dehydrogenase	Secoisolariciresinol dehydrogenase (Fragment) OS=Podophyllum peltatum (Mayapple) PE=1 SV=1	Q	Secondary metabolites biosynthesis, transport and catabolism	hypothetical protein JCGZ_08810 [Jatropha curcas]
F01_c7956/f1p0/1412	--	--	--	--	--	--	No apical meristem (NAM) protein	NAC domain-containing protein 55 GN=MJK13.16 OS=Arabidopsis thaliana (Mouse-ear cress) PE=2 SV=1	R	General function prediction only	PREDICTED: NAC domain-containing protein 72 isoform X1 [Vitis vinifera]
F01_c10193/f2p1/1501	[R]	General function prediction only	Molecular Function: GTP binding (GO:0005525);;	K03665|0|vvi:100247233|putative GTP-binding protein 6; K03665 GTP-binding protein HflX (A)	[R]	General function prediction only	50S ribosome-binding GTPase;; GTP-binding GTPase N-terminal;; Dynamin family;; Ferrous iron transport protein B;; Elongation factor Tu GTP binding domain;; ADP-ribosylation factor family;; CobW/HypB/UreG, nucleotide-binding domain	GTP-binding protein At3g49725, chloroplastic (Precursor) GN=At3g49725 OS=Arabidopsis thaliana (Mouse-ear cress) PE=2 SV=2	R	General function prediction only	PREDICTED: putative GTP-binding protein 6 [Vitis vinifera]
F01_c14117/f2p4/3406	--	--	Cellular Component: ubiquitin ligase complex (GO:0000151);; Molecular Function: ubiquitin-protein transferase activity (GO:0004842);; Biological Process: protein ubiquitination (GO:0016567);;	--	[S]	Function unknown	U-box domain	U-box domain-containing protein 44 GN=F2D10.27 OS=Arabidopsis thaliana (Mouse-ear cress) PE=1 SV=1	S	Function unknown	unnamed protein product [Vitis vinifera]
F01_c4224/f1p0/1671	--	--	--	--	--	--	--	--	S	Function unknown	PREDICTED: uncharacterized protein LOC100250010 [Vitis vinifera]
F01_c12568/f1p2/1101	--	--	Molecular Function: zinc ion binding (GO:0008270);;	K11982|2.3727e-83|mdm:103414675|E3 ubiquitin-protein ligase CIP8-like; K11982 E3 ubiquitin-protein ligase RNF115/126 [EC:6.3.2.19] (A)	[O]	Posttranslational modification, protein turnover, chaperones	Ring finger domain;; Zinc finger, C3HC4 type (RING finger)	E3 ubiquitin-protein ligase RING1-like GN=At3g19950 OS=Arabidopsis thaliana (Mouse-ear cress) PE=1 SV=1	O	Posttranslational modification, protein turnover, chaperones	PREDICTED: E3 ubiquitin-protein ligase CIP8-like [Malus domestica]
F01_c9757/f1p4/1468	[R]	General function prediction only	Molecular Function: nucleotide binding (GO:0000166);; Cellular Component: nuclear envelope (GO:0005635);; Cellular Component: heterotrimeric G-protein complex (GO:0005834);; Biological Process: protein targeting to mitochondrion (GO:0006626);; Biological Process: fatty acid beta-oxidation (GO:0006635);; Biological Process: proteasome-mediated ubiquitin-dependent protein catabolic process (GO:0043…	K14299|0|vvi:100263869|hydroquinone glucosyltransferase; K14299 nucleoporin SEH1 (A)	[YU]	--	WD domain, G-beta repeat	Protein SEH1 {ECO:0000303|PubMed:21189294} OS=Arabidopsis thaliana (Mouse-ear cress) PE=1 SV=1	1366	nucleoporin	hypothetical protein VITISV_003214 [Vitis vinifera]
F01_c2559/f3p3/2628	--	--	Biological Process: protein glycosylation (GO:0006486);; Biological Process: calcium ion transport (GO:0006816);; Biological Process: gravitropism (GO:0009630);;	--	--	--	--	--	S	Function unknown	PREDICTED: paramyosin [Vitis vinifera]
F01_c2614/f2p3/2031	[R]	General function prediction only	Cellular Component: anaphase-promoting complex (GO:0005680);; Biological Process: embryo sac egg cell differentiation (GO:0009560);; Biological Process: regulation of mitotic metaphase/anaphase transition (GO:0030071);; Biological Process: regulation of defense response (GO:0031347);; Biological Process: regulation of DNA endoreduplication (GO:0032875);; Biological Process: transcription factor i…	K03355|0|vvi:100249407|anaphase-promoting complex subunit 8; K03355 anaphase-promoting complex subunit 8 (A)	[DO]	--	Anaphase promoting complex subunit 8 / Cdc23;; Tetratricopeptide repeat;; TPR repeat;; Tetratricopeptide repeat;; Tetratricopeptide repeat;; Tetratricopeptide repeat;; Tetratricopeptide repeat;; Tetratricopeptide repeat;; Anaphase-promoting complex, cyclosome, subunit 3;; Tetratricopeptide repeat;; Tetratricopeptide repeat;; Tetratricopeptide repeat;; Tetratricopeptide repeat;; Tetratricopeptide …	Anaphase-promoting complex subunit 8 GN=T24C20.30 OS=Arabidopsis thaliana (Mouse-ear cress) PE=1 SV=1	D	Cell cycle control, cell division, chromosome partitioning	PREDICTED: anaphase-promoting complex subunit 8-like [Eucalyptus grandis]
F01_c1358/f1p1/925	[K]	Transcription	Biological Process: response to salt stress (GO:0009651);; Cellular Component: cytosolic ribosome (GO:0022626);;	K03626|1.1049e-91|pda:103722855|nascent polypeptide-associated complex subunit alpha-like protein 1; K03626 nascent polypeptide-associated complex subunit alpha (A)	[K]	Transcription	NAC domain;; UBA/TS-N domain	Nascent polypeptide-associated complex subunit alpha-like protein OS=Pinus taeda (Loblolly pine) PE=2 SV=1	K	Transcription	Nascent polypeptide-associated complex subunit alpha-like protein [Morus notabilis]
F01_c16699/f1p0/3715	--	--	--	--	[R]	General function prediction only	--	--	R	General function prediction only	Uncharacterized protein TCM_015097 [Theobroma cacao]
F01_c15749/f1p0/1401	--	--	--	--	[R]	General function prediction only	--	Pentatricopeptide repeat-containing protein PNM1, mitochondrial (Precursor) GN=PNM1 OS=Arabidopsis thaliana (Mouse-ear cress) PE=1 SV=1	R	General function prediction only	PREDICTED: pentatricopeptide repeat-containing protein PNM1, mitochondrial [Sesamum indicum]
F01_c4053/f1p0/4169	--	--	--	--	--	--	--	Protein FLX-like 2 GN=F5A8.8 OS=Arabidopsis thaliana (Mouse-ear cress) PE=1 SV=1	R	General function prediction only	hypothetical protein JCGZ_25650 [Jatropha curcas]
F01_c10392/f1p2/1022	[O]	Posttranslational modification, protein turnover, chaperones	Cellular Component: proteasome complex (GO:0000502);; Molecular Function: ATP binding (GO:0005524);; Cellular Component: cytoplasm (GO:0005737);; Molecular Function: nucleoside-triphosphatase activity (GO:0017111);; Biological Process: protein catabolic process (GO:0030163);;	K03062|1.50123e-131|fve:101305734|26S proteasome regulatory subunit 4 homolog A-like; K03062 26S proteasome regulatory subunit T2 (A)	[O]	Posttranslational modification, protein turnover, chaperones	ATPase family associated with various cellular activities (AAA)	26S protease regulatory subunit 4 homolog GN=P0034A04.112 OS=Oryza sativa subsp. japonica (Rice) PE=2 SV=2	O	Posttranslational modification, protein turnover, chaperones	hypothetical protein OsI_11173 [Oryza sativa Indica Group]
F01_c5774/f1p0/2014	[G]	Carbohydrate transport and metabolism	Molecular Function: beta-N-acetylhexosaminidase activity (GO:0004563);; Cellular Component: plasma membrane (GO:0005886);; Biological Process: carbohydrate metabolic process (GO:0005975);; Cellular Component: plant-type cell wall (GO:0009505);; Molecular Function: cation binding (GO:0043169);;	K12373|0|rcu:RCOM_1076600|beta-hexosaminidase, putative (EC:3.2.1.52); K12373 hexosaminidase [EC:3.2.1.52] (A)	[G]	Carbohydrate transport and metabolism	Glycosyl hydrolase family 20, catalytic domain	Beta-hexosaminidase 3 (Precursor) GN=F5I14.13 OS=Arabidopsis thaliana (Mouse-ear cress) PE=1 SV=1	R	General function prediction only	hypothetical protein JCGZ_13414 [Jatropha curcas]
F01_c4029/f1p4/1750	--	--	--	--	--	--	NPH3 family	BTB/POZ domain-containing protein At5g66560 GN=At5g66560 OS=Arabidopsis thaliana (Mouse-ear cress) PE=2 SV=2	R	General function prediction only	hypothetical protein JCGZ_12296 [Jatropha curcas]
F01_c2010/f6p16/4103	--	--	--	K06111|0|vvi:100253015|exocyst complex component SEC8; K06111 exocyst complex component 4 (A)	--	--	Sec8 exocyst complex component specific domain;; Protein of unknown function N-terminal domain (DUF2450)	Exocyst complex component SEC8 GN=SEC8 OS=Arabidopsis thaliana (Mouse-ear cress) PE=1 SV=1	U	Intracellular trafficking, secretion, and vesicular transport	PREDICTED: exocyst complex component SEC8 [Vitis vinifera]
F01_c5650/f1p4/4150	[T]	Signal transduction mechanisms	--	K17508|1.25541e-79|mus:103997378|probable protein phosphatase 2C 55; K17508 protein phosphatase 2C homolog 7 [EC:3.1.3.16] (A)	[T]	Signal transduction mechanisms	COBRA-like protein	Probable protein phosphatase 2C 55 GN=At4g16580 OS=Arabidopsis thaliana (Mouse-ear cress) PE=2 SV=2	T	Signal transduction mechanisms	PREDICTED: probable protein phosphatase 2C 55 isoform X1 [Sesamum indicum]
F01_c10134/f1p3/4312	--	--	--	K11000|0|pop:POPTR_0013s134902|hypothetical protein; K11000 callose synthase [EC:2.4.1.-] (A)	[M]	Cell wall/membrane/envelope biogenesis	1,3-beta-glucan synthase component	Callose synthase 12 OS=Arabidopsis thaliana (Mouse-ear cress) PE=2 SV=1	S	Function unknown	hypothetical protein POPTR_0013s134902g, partial [Populus trichocarpa]
F01_c14063/f2p2/3899	--	--	--	--	--	--	--	--	S	Function unknown	PREDICTED: uncharacterized protein LOC100243326 isoform X2 [Vitis vinifera]
F01_c10059/f1p1/1399	[GER]	--	Cellular Component: Golgi membrane (GO:0000139);; Molecular Function: nucleotide-sugar transmembrane transporter activity (GO:0005338);; Molecular Function: sugar:proton symporter activity (GO:0005351);; Biological Process: carbohydrate transport (GO:0008643);; Biological Process: nucleotide-sugar transport (GO:0015780);; Cellular Component: integral component of membrane (GO:0016021);;	--	[G]	Carbohydrate transport and metabolism	Nucleotide-sugar transporter	CMP-sialic acid transporter 2 GN=At2g43240 OS=Arabidopsis thaliana (Mouse-ear cress) PE=2 SV=1	P	Inorganic ion transport and metabolism	Nucleotide-sugar transporter family protein isoform 1 [Theobroma cacao]
F01_c16900/f1p4/1396	[G]	Carbohydrate transport and metabolism	Molecular Function: catalytic activity (GO:0003824);; Biological Process: carbohydrate metabolic process (GO:0005975);;	K00616|0|vvi:100257422|probable transaldolase; K00616 transaldolase [EC:2.2.1.2] (A)	[G]	Carbohydrate transport and metabolism	Transaldolase	--	G	Carbohydrate transport and metabolism	PREDICTED: probable transaldolase [Vitis vinifera]
F01_c7292/f1p0/2413	--	--	Biological Process: cellular process (GO:0009987);; Molecular Function: transferase activity, transferring phosphorus-containing groups (GO:0016772);;	--	--	--	zinc-binding in reverse transcriptase	--	R	General function prediction only	hypothetical protein PRUPE_ppa019714mg, partial [Prunus persica]
F01_c16077/f1p0/1168	--	--	Molecular Function: oxidoreductase activity, acting on CH-OH group of donors (GO:0016614);; Molecular Function: flavin adenine dinucleotide binding (GO:0050660);; Molecular Function: iron-sulfur cluster binding (GO:0051536);; Biological Process: oxidation-reduction process (GO:0055114);;	--	[R]	General function prediction only	--	--	S	Function unknown	PREDICTED: uncharacterized protein LOC105110751 isoform X1 [Populus euphratica]
F01_c3530/f1p2/2308	[J]	Translation, ribosomal structure and biogenesis	Molecular Function: amidase activity (GO:0004040);; Cellular Component: vacuolar membrane (GO:0005774);; Cellular Component: endoplasmic reticulum (GO:0005783);; Cellular Component: Golgi apparatus (GO:0005794);; Cellular Component: plasma membrane (GO:0005886);; Molecular Function: transferase activity (GO:0016740);; Molecular Function: carbon-nitrogen ligase activity, with glutamine as amido-N-…	--	[J]	Translation, ribosomal structure and biogenesis	Amidase	Fatty acid amide hydrolase GN=FAAH OS=Arabidopsis thaliana (Mouse-ear cress) PE=1 SV=1	J	Translation, ribosomal structure and biogenesis	Amidase [Theobroma cacao]
F01_c14956/f1p11/1665	[O]	Posttranslational modification, protein turnover, chaperones	Molecular Function: ATP binding (GO:0005524);; Cellular Component: nucleus (GO:0005634);; Cellular Component: cytosol (GO:0005829);; Cellular Component: plasma membrane (GO:0005886);; Biological Process: ATP catabolic process (GO:0006200);; Biological Process: ubiquitin-dependent protein catabolic process (GO:0006511);; Molecular Function: peptidase activity (GO:0008233);; Cellular Component: pro…	K03066|0|vvi:100254957|26S protease regulatory subunit 8 homolog A; K03066 26S proteasome regulatory subunit T6 (A)	[O]	Posttranslational modification, protein turnover, chaperones	ATPase family associated with various cellular activities (AAA);; AAA domain (Cdc48 subfamily);; AAA domain (dynein-related subfamily);; Holliday junction DNA helicase ruvB N-terminus	26S protease regulatory subunit 8 homolog A GN=F28I16.140 OS=Arabidopsis thaliana (Mouse-ear cress) PE=1 SV=1	O	Posttranslational modification, protein turnover, chaperones	PREDICTED: 26S protease regulatory subunit 8 homolog A [Nelumbo nucifera]
F01_c12641/f1p4/1075	--	--	--	--	[T]	Signal transduction mechanisms	--	Probable receptor-like protein kinase At1g67000 (Precursor) GN=At1g67000 OS=Arabidopsis thaliana (Mouse-ear cress) PE=2 SV=2	T	Signal transduction mechanisms	PREDICTED: probable serine/threonine-protein kinase At1g18390 [Populus euphratica]
F01_c11666/f1p3/2245	[P]	Inorganic ion transport and metabolism	Molecular Function: copper ion binding (GO:0005507);; Biological Process: glycolytic process (GO:0006096);; Biological Process: water transport (GO:0006833);; Biological Process: hyperosmotic response (GO:0006972);; Biological Process: Golgi organization (GO:0007030);; Biological Process: response to temperature stimulus (GO:0009266);; Cellular Component: chloroplast stroma (GO:0009570);; Biologi…	K00392|0|vvi:100245032|sulfite reductase 1 [ferredoxin], chloroplastic; K00392 sulfite reductase (ferredoxin) [EC:1.8.7.1] (A)	[P]	Inorganic ion transport and metabolism	Nitrite and sulphite reductase 4Fe-4S domain;; Nitrite/Sulfite reductase ferredoxin-like half domain	Sulfite reductase 1 [ferredoxin], chloroplastic (Precursor) GN=SIR1 OS=Nicotiana tabacum (Common tobacco) PE=1 SV=1	P	Inorganic ion transport and metabolism	PREDICTED: sulfite reductase 1 [ferredoxin], chloroplastic [Vitis vinifera]
F01_c5900/f2p2/2132	[L]	Replication, recombination and repair	Molecular Function: DNA binding (GO:0003677);; Molecular Function: ATP binding (GO:0005524);; Molecular Function: nucleoside-triphosphatase activity (GO:0017111);;	--	[L]	Replication, recombination and repair	AAA domain;; AAA domain;; Part of AAA domain;; AAA domain;; Viral (Superfamily 1) RNA helicase;; AAA domain;; Type III restriction enzyme, res subunit;; DEAD/DEAH box helicase;; ATPase family associated with various cellular activities (AAA);; Type II/IV secretion system protein;; UvrD/REP helicase N-terminal domain;; Uncharacterized conserved protein (DUF2075)	Regulator of nonsense transcripts 1 homolog GN=MQD22.15 OS=Arabidopsis thaliana (Mouse-ear cress) PE=1 SV=2	L	Replication, recombination and repair	PREDICTED: DNA-binding protein SMUBP-2 [Vitis vinifera]
F01_c1257/f13p15/4107	--	--	Cellular Component: nucleus (GO:0005634);; Cellular Component: cytosol (GO:0005829);; Cellular Component: plasma membrane (GO:0005886);;	--	--	--	Variant SH3 domain;; SH3 domain	--	T	Signal transduction mechanisms	PREDICTED: uncharacterized protein LOC100266278 isoform X1 [Vitis vinifera]
F01_c13069/f1p3/2225	--	--	--	--	--	--	MAC/Perforin domain	MACPF domain-containing protein At4g24290 GN=At4g24290 OS=Arabidopsis thaliana (Mouse-ear cress) PE=2 SV=1	S	Function unknown	PREDICTED: MACPF domain-containing protein At4g24290-like [Malus domestica]
F01_c14073/f2p3/3862	--	--	--	--	--	--	IQ calmodulin-binding motif	--	S	Function unknown	PREDICTED: protein IQ-DOMAIN 14 isoform X1 [Populus euphratica]
F01_c1064/f23p31/2576	[O]	Posttranslational modification, protein turnover, chaperones	Molecular Function: serine-type endopeptidase activity (GO:0004252);; Cellular Component: extracellular region (GO:0005576);; Biological Process: proteolysis (GO:0006508);; Molecular Function: identical protein binding (GO:0042802);; Biological Process: negative regulation of catalytic activity (GO:0043086);;	--	--	--	Peptidase inhibitor I9	Subtilisin-like protease (Precursor) GN=At5g67360 OS=Arabidopsis thaliana (Mouse-ear cress) PE=1 SV=1	O	Posttranslational modification, protein turnover, chaperones	PREDICTED: subtilisin-like protease [Vitis vinifera]
F01_c8430/f1p0/3086	[F]	Nucleotide transport and metabolism	Molecular Function: ribonucleoside-diphosphate reductase activity, thioredoxin disulfide as acceptor (GO:0004748);; Molecular Function: ATP binding (GO:0005524);; Cellular Component: ribonucleoside-diphosphate reductase complex (GO:0005971);; Biological Process: DNA replication (GO:0006260);; Biological Process: oxidation-reduction process (GO:0055114);;	K10807|0|cme:CYME_CMM323C|ribonucleoside-diphosphate reductase alpha chain; K10807 ribonucleoside-diphosphate reductase subunit M1 [EC:1.17.4.1] (A)	[F]	Nucleotide transport and metabolism	Ribonucleotide reductase, all-alpha domain	Ribonucleoside-diphosphate reductase large subunit {ECO:0000303|PubMed:10542051} OS=Arabidopsis thaliana (Mouse-ear cress) PE=1 SV=1	F	Nucleotide transport and metabolism	hypothetical protein PLEOSDRAFT_1056476 [Pleurotus ostreatus PC15]
F01_c6494/f3p1/1039	--	--	--	--	[R]	General function prediction only	F-box-like;; F-box domain	F-box protein At5g67140 GN=At5g67140 OS=Arabidopsis thaliana (Mouse-ear cress) PE=2 SV=1	R	General function prediction only	hypothetical protein CICLE_v10026421mg [Citrus clementina]
F01_c6998/f2p0/3186	--	--	Molecular Function: phosphorelay sensor kinase activity (GO:0000155);; Biological Process: phosphorelay signal transduction system (GO:0000160);; Cellular Component: membrane (GO:0016020);; Biological Process: signal transduction by phosphorylation (GO:0023014);;	K12879|0|vvi:100254201|THO complex subunit 2; K12879 THO complex subunit 2 (A)	[K]	Transcription	Transcription- and export-related complex subunit;; Transcription factor/nuclear export subunit protein 2	THO complex subunit 2 GN=F5A9.21/F5A9.22 OS=Arabidopsis thaliana (Mouse-ear cress) PE=1 SV=1	K	Transcription	PREDICTED: THO complex subunit 2 [Vitis vinifera]
F01_c14222/f1p2/3216	--	--	--	--	--	--	hAT family C-terminal dimerisation region	--	S	Function unknown	PREDICTED: uncharacterized protein LOC100780312 [Glycine max]
F01_c13522/f1p0/2831	[R]	General function prediction only	Molecular Function: nucleic acid binding (GO:0003676);; Biological Process: rRNA processing (GO:0006364);; Cellular Component: small-subunit processome (GO:0032040);;	K14555|2.29314e-104|sot:102586043|transducin beta-like protein 3-like; K14555 U3 small nucleolar RNA-associated protein 13 (A)	[A]	RNA processing and modification	WD domain, G-beta repeat	Transcription initiation factor TFIID subunit 5 GN=TAF5 OS=Arabidopsis thaliana (Mouse-ear cress) PE=1 SV=1	A	RNA processing and modification	hypothetical protein COCVIDRAFT_98979 [Bipolaris victoriae FI3]
F01_c18298/f7p20/1742	[Q]	Secondary metabolites biosynthesis, transport and catabolism	Molecular Function: iron ion binding (GO:0005506);; Molecular Function: electron carrier activity (GO:0009055);; Molecular Function: flavonoid 3'-monooxygenase activity (GO:0016711);; Molecular Function: heme binding (GO:0020037);; Biological Process: oxidation-reduction process (GO:0055114);;	K05280|0|vvi:100232999|F3'H, VvF3'h4; flavonoid 3' hydroxylase; K05280 flavonoid 3'-monooxygenase [EC:1.14.13.21] (A)	[Q]	Secondary metabolites biosynthesis, transport and catabolism	Cytochrome P450	Flavonoid 3&apos;-monooxygenase GN=CYP75B2 OS=Petunia hybrida (Petunia) PE=2 SV=1	Q	Secondary metabolites biosynthesis, transport and catabolism	flavonoid 3&apos;-hydroxylase [Paeonia suffruticosa]
F01_c17337/f1p1/1023	--	--	--	--	--	--	SAM domain (Sterile alpha motif);; SAM domain (Sterile alpha motif)	--	R	General function prediction only	hypothetical protein PRUPE_ppa013325mg [Prunus persica]
F01_c2837/f2p3/2305	--	--	Cellular Component: endosome (GO:0005768);; Cellular Component: Golgi apparatus (GO:0005794);; Cellular Component: trans-Golgi network (GO:0005802);; Biological Process: signal transduction (GO:0007165);;	--	[R]	General function prediction only	--	Probable LRR receptor-like serine/threonine-protein kinase At1g51810 (Precursor) GN=At1g51810 OS=Arabidopsis thaliana (Mouse-ear cress) PE=2 SV=1	R	General function prediction only	hypothetical protein CISIN_1g006035mg [Citrus sinensis]
F01_c11411/f2p2/2060	[O]	Posttranslational modification, protein turnover, chaperones	Molecular Function: ATP binding (GO:0005524);; Cellular Component: cytoplasm (GO:0005737);; Biological Process: protein folding (GO:0006457);; Molecular Function: unfolded protein binding (GO:0051082);;	K09494|0|vvi:100257518|T-complex protein 1 subunit beta; K09494 T-complex protein 1 subunit beta (A)	[O]	Posttranslational modification, protein turnover, chaperones	TCP-1/cpn60 chaperonin family	T-complex protein 1 subunit beta {ECO:0000303|PubMed:11599560} OS=Arabidopsis thaliana (Mouse-ear cress) PE=1 SV=1	O	Posttranslational modification, protein turnover, chaperones	PREDICTED: T-complex protein 1 subunit beta-like [Nelumbo nucifera]
F01_c15289/f1p4/2869	--	--	--	K12616|0|vvi:100241190|enhancer of mRNA-decapping protein 4-like; K12616 enhancer of mRNA-decapping protein 4 (A)	[R]	General function prediction only	WD domain, G-beta repeat	Enhancer of mRNA-decapping protein 4 GN=MDC11.13 OS=Arabidopsis thaliana (Mouse-ear cress) PE=1 SV=1	R	General function prediction only	PREDICTED: enhancer of mRNA-decapping protein 4-like [Vitis vinifera]
F01_c270/f2p0/757	--	--	Biological Process: response to stress (GO:0006950);;	K13993|2.78849e-33|gmx:100500475|uncharacterized LOC100500475; K13993 HSP20 family protein (A)	[O]	Posttranslational modification, protein turnover, chaperones	Hsp20/alpha crystallin family	17.6 kDa class I heat shock protein OS=Solanum peruvianum (Peruvian tomato) PE=2 SV=1	O	Posttranslational modification, protein turnover, chaperones	hypothetical protein MIMGU_mgv1a015362mg [Erythranthe guttata]
F01_c5120/f1p1/3666	[M]	Cell wall/membrane/envelope biogenesis	Cellular Component: Golgi apparatus (GO:0005794);; Molecular Function: zinc ion binding (GO:0008270);; Biological Process: plant-type primary cell wall biogenesis (GO:0009833);; Cellular Component: integral component of membrane (GO:0016021);; Molecular Function: cellulose synthase (UDP-forming) activity (GO:0016760);; Biological Process: cellulose biosynthetic process (GO:0030244);;	K10999|0|vvi:100245168|cellulose synthase A catalytic subunit 3 [UDP-forming]-like; K10999 cellulose synthase A [EC:2.4.1.12] (A)	--	--	Cellulose synthase	Cellulose synthase A catalytic subunit 3 [UDP-forming] GN=At5g05170 OS=Arabidopsis thaliana (Mouse-ear cress) PE=1 SV=2	O	Posttranslational modification, protein turnover, chaperones	unnamed protein product [Vitis vinifera]
F01_c2608/f5p0/1395	[R]	General function prediction only	Molecular Function: nucleotide binding (GO:0000166);; Molecular Function: nucleic acid binding (GO:0003676);;	K12741|6.4179e-116|pper:PRUPE_ppa007179mg|hypothetical protein; K12741 heterogeneous nuclear ribonucleoprotein A1/A3 (A)	[R]	General function prediction only	RNA recognition motif. (a.k.a. RRM, RBD, or RNP domain);; RNA recognition motif (a.k.a. RRM, RBD, or RNP domain);; RNA recognition motif. (a.k.a. RRM, RBD, or RNP domain)	Heterogeneous nuclear ribonucleoprotein 1 GN=RNP1 OS=Arabidopsis thaliana (Mouse-ear cress) PE=1 SV=1	A	RNA processing and modification	unnamed protein product [Vitis vinifera]
F01_c1367/f15p28/2325	[G]	Carbohydrate transport and metabolism	Molecular Function: starch synthase activity (GO:0009011);; Biological Process: glucan biosynthetic process (GO:0009250);;	K13679|0|tcc:TCM_015612|UDP-Glycosyltransferase superfamily protein isoform 1; K13679 granule-bound starch synthase [EC:2.4.1.242] (A)	--	--	Starch synthase catalytic domain;; Glycosyl transferases group 1;; Glycosyl transferases group 1	Granule-bound starch synthase 1, chloroplastic/amyloplastic (Precursor) GN=WAXY OS=Manihot esculenta (Cassava) PE=2 SV=1	M	Cell wall/membrane/envelope biogenesis	UDP-Glycosyltransferase superfamily protein isoform 1 [Theobroma cacao]
F01_c1532/f4p9/1349	--	--	Biological Process: response to molecule of bacterial origin (GO:0002237);; Biological Process: signal transduction (GO:0007165);; Biological Process: stomatal complex morphogenesis (GO:0010103);; Molecular Function: kinase activity (GO:0016301);; Biological Process: phosphorylation (GO:0016310);; Biological Process: stamen development (GO:0048443);;	--	[R]	General function prediction only	Leucine Rich repeats (2 copies);; Leucine Rich Repeat;; Leucine rich repeat;; Leucine Rich repeat;; Leucine rich repeat	Probable LRR receptor-like serine/threonine-protein kinase At4g08850 (Precursor) GN=At4g08850 OS=Arabidopsis thaliana (Mouse-ear cress) PE=2 SV=3	R	General function prediction only	hypothetical protein JCGZ_15684 [Jatropha curcas]
F01_c12234/f2p0/4595	[L]	Replication, recombination and repair	Molecular Function: hydrolase activity (GO:0016787);; Molecular Function: organic cyclic compound binding (GO:0097159);; Molecular Function: heterocyclic compound binding (GO:1901363);;	--	[A]	RNA processing and modification	--	Probable pre-mRNA-splicing factor ATP-dependent RNA helicase GN=At2g47250 OS=Arabidopsis thaliana (Mouse-ear cress) PE=2 SV=1	A	RNA processing and modification	PREDICTED: ATP-dependent RNA helicase Dhx29 isoform X3 [Populus euphratica]
F01_c14158/f1p4/2754	[O]	Posttranslational modification, protein turnover, chaperones	Biological Process: mRNA splicing, via spliceosome (GO:0000398);; Biological Process: protein peptidyl-prolyl isomerization (GO:0000413);; Molecular Function: peptidyl-prolyl cis-trans isomerase activity (GO:0003755);; Biological Process: protein folding (GO:0006457);;	K09566|1.66834e-96|vvi:100264514|peptidyl-prolyl cis-trans isomerase CYP95; K09566 peptidyl-prolyl isomerase G (cyclophilin G) [EC:5.2.1.8] (A)	[O]	Posttranslational modification, protein turnover, chaperones	Cyclophilin type peptidyl-prolyl cis-trans isomerase/CLD	Peptidyl-prolyl cis-trans isomerase CYP95 GN=F8B4.120 OS=Arabidopsis thaliana (Mouse-ear cress) PE=1 SV=2	O	Posttranslational modification, protein turnover, chaperones	unnamed protein product [Vitis vinifera]
F01_c4343/f1p2/1130	[H]	Coenzyme transport and metabolism	Molecular Function: adenosylhomocysteinase activity (GO:0004013);; Biological Process: one-carbon metabolic process (GO:0006730);;	K01251|0|pda:103710610|adenosylhomocysteinase-like; K01251 adenosylhomocysteinase [EC:3.3.1.1] (A)	[H]	Coenzyme transport and metabolism	S-adenosyl-L-homocysteine hydrolase, NAD binding domain;; S-adenosyl-L-homocysteine hydrolase;; D-isomer specific 2-hydroxyacid dehydrogenase, NAD binding domain;; Acetohydroxy acid isomeroreductase, catalytic domain;; Tetrahydrofolate dehydrogenase/cyclohydrolase, NAD(P)-binding domain;; TrkA-N domain	Adenosylhomocysteinase 1 GN=dl3010w OS=Arabidopsis thaliana (Mouse-ear cress) PE=1 SV=1	H	Coenzyme transport and metabolism	PREDICTED: adenosylhomocysteinase-like [Phoenix dactylifera]
F01_c15490/f1p0/1358	--	--	Biological Process: telomere maintenance (GO:0000723);; Molecular Function: DNA binding (GO:0003677);;	--	[R]	General function prediction only	--	Protection of telomeres protein 1b GN=MHF15 OS=Arabidopsis thaliana (Mouse-ear cress) PE=1 SV=1	R	General function prediction only	PREDICTED: protection of telomeres protein 1b-like [Populus euphratica]
F01_c14019/f1p0/2328	--	--	Cellular Component: Piccolo NuA4 histone acetyltransferase complex (GO:0032777);;	K11322|0|vvi:100264813|uncharacterized LOC100264813; K11322 enhancer of polycomb-like protein (A)	[K]	Transcription	Enhancer of polycomb-like	--	K	Transcription	PREDICTED: uncharacterized protein LOC100264813 [Vitis vinifera]
F01_c11417/f2p2/2257	--	--	Biological Process: defense response to oomycetes (GO:0002229);; Biological Process: respiratory burst involved in defense response (GO:0002679);; Molecular Function: protein serine/threonine kinase activity (GO:0004674);; Molecular Function: ATP binding (GO:0005524);; Cellular Component: endosome (GO:0005768);; Cellular Component: plasma membrane (GO:0005886);; Biological Process: protein phosph…	K13418|3.37216e-131|fve:101297498|somatic embryogenesis receptor kinase 1-like; K13418 somatic embryogenesis receptor kinase 1 [EC:2.7.10.1 2.7.11.1] (A)	[T]	Signal transduction mechanisms	Protein tyrosine kinase	Probable LRR receptor-like serine/threonine-protein kinase At5g65240 (Precursor) GN=At5g65240 OS=Arabidopsis thaliana (Mouse-ear cress) PE=2 SV=1	T	Signal transduction mechanisms	PREDICTED: somatic embryogenesis receptor kinase 1-like [Fragaria vesca subsp. vesca]
F01_c16135/f1p1/1017	--	--	--	--	[S]	Function unknown	MAGE family	--	S	Function unknown	PREDICTED: melanoma-associated antigen 8 isoform X2 [Vitis vinifera]
F01_c11831/f1p3/2367	[J]	Translation, ribosomal structure and biogenesis	Molecular Function: glutamate-tRNA ligase activity (GO:0004818);; Molecular Function: glutamine-tRNA ligase activity (GO:0004819);; Molecular Function: ATP binding (GO:0005524);; Cellular Component: cytosol (GO:0005829);; Biological Process: gluconeogenesis (GO:0006094);; Biological Process: glutamyl-tRNA aminoacylation (GO:0006424);; Biological Process: cytoskeleton organization (GO:0007010);; B…	K01885|0|vvi:100263087|probable glutamate--tRNA ligase, cytoplasmic; K01885 glutamyl-tRNA synthetase [EC:6.1.1.17] (A)	[J]	Translation, ribosomal structure and biogenesis	tRNA synthetases class I (E and Q), catalytic domain;; tRNA synthetases class I (E and Q), anti-codon binding domain;; Glutathione S-transferase, C-terminal domain	Glutamine--tRNA ligase OS=Lupinus luteus (European yellow lupin) PE=2 SV=2	J	Translation, ribosomal structure and biogenesis	PREDICTED: probable glutamate--tRNA ligase, cytoplasmic isoform X1 [Vitis vinifera]
F01_c6606/f1p1/1718	[I]	Lipid transport and metabolism	Biological Process: nuclear division (GO:0000280);; Molecular Function: galactokinase activity (GO:0004335);; Molecular Function: mevalonate kinase activity (GO:0004496);; Molecular Function: ATP binding (GO:0005524);; Cellular Component: cytosol (GO:0005829);; Biological Process: galactose metabolic process (GO:0006012);; Biological Process: nucleolus organization (GO:0007000);; Biological Proce…	K00869|2.74632e-140|pop:POPTR_0013s02490g|POPTRDRAFT_729638; hypothetical protein; K00869 mevalonate kinase [EC:2.7.1.36] (A)	[I]	Lipid transport and metabolism	GHMP kinases C terminal	Mevalonate kinase GN=At5g27450 OS=Arabidopsis thaliana (Mouse-ear cress) PE=2 SV=1	I	Lipid transport and metabolism	PREDICTED: mevalonate kinase-like [Populus euphratica]
F01_c7758/f2p0/2576	[R]	General function prediction only	Molecular Function: protein kinase activity (GO:0004672);; Molecular Function: ATP binding (GO:0005524);; Biological Process: protein phosphorylation (GO:0006468);;	--	[R]	General function prediction only	ABC1 family;; Phosphotransferase enzyme family	Uncharacterized aarF domain-containing protein kinase At1g79600, chloroplastic (Precursor) GN=At1g79600 OS=Arabidopsis thaliana (Mouse-ear cress) PE=2 SV=1	R	General function prediction only	PREDICTED: uncharacterized aarF domain-containing protein kinase At1g79600, chloroplastic [Vitis vinifera]
F01_c9346/f1p2/1261	[R]	General function prediction only	Cellular Component: nucleus (GO:0005634);; Molecular Function: poly(A) binding (GO:0008143);; Cellular Component: cytoplasmic stress granule (GO:0010494);; Biological Process: cellular response to heat (GO:0034605);;	--	[R]	General function prediction only	RNA recognition motif. (a.k.a. RRM, RBD, or RNP domain);; RNA recognition motif (a.k.a. RRM, RBD, or RNP domain);; RNA recognition motif. (a.k.a. RRM, RBD, or RNP domain)	Polyadenylate-binding protein RBP47 GN=RBP47 OS=Nicotiana plumbaginifolia (Leadwort-leaved tobacco) PE=1 SV=1	A	RNA processing and modification	unnamed protein product [Vitis vinifera]
F01_c1669/f6p3/1222	[R]	General function prediction only	Molecular Function: RNA binding (GO:0003723);; Biological Process: translational initiation (GO:0006413);; Cellular Component: translation preinitiation complex (GO:0070993);;	K03248|2.2313e-107|vvi:100242668|eukaryotic translation initiation factor 3 subunit G; K03248 translation initiation factor 3 subunit G (A)	[J]	Translation, ribosomal structure and biogenesis	Eukaryotic translation initiation factor 3 subunit G;; RNA recognition motif. (a.k.a. RRM, RBD, or RNP domain);; RNA recognition motif (a.k.a. RRM, RBD, or RNP domain);; RNA recognition motif. (a.k.a. RRM, RBD, or RNP domain)	Nucleolin 1 OS=Oryza sativa subsp. japonica (Rice) PE=2 SV=1	J	Translation, ribosomal structure and biogenesis	PREDICTED: eukaryotic translation initiation factor 3 subunit G [Vitis vinifera]
F01_c1157/f1p11/957	[I]	Lipid transport and metabolism	Molecular Function: isopentenyl-diphosphate delta-isomerase activity (GO:0004452);; Biological Process: isoprenoid biosynthetic process (GO:0008299);; Biological Process: photosynthesis (GO:0015979);; Biological Process: chlorophyll biosynthetic process (GO:0015995);; Molecular Function: hydrolase activity (GO:0016787);; Molecular Function: metal ion binding (GO:0046872);; Biological Process: dim…	K01823|5.7158e-164|mdm:103419532|isopentenyl-diphosphate Delta-isomerase I; K01823 isopentenyl-diphosphate delta-isomerase [EC:5.3.3.2] (A)	[Q]	Secondary metabolites biosynthesis, transport and catabolism	NUDIX domain	Isopentenyl-diphosphate Delta-isomerase II GN=IPI2 OS=Camptotheca acuminata (Happy tree) PE=2 SV=1	Q	Secondary metabolites biosynthesis, transport and catabolism	PREDICTED: isopentenyl-diphosphate Delta-isomerase I [Malus domestica]
F01_c3893/f1p7/2356	[J]	Translation, ribosomal structure and biogenesis	Molecular Function: arginine-tRNA ligase activity (GO:0004814);; Molecular Function: ATP binding (GO:0005524);; Cellular Component: mitochondrion (GO:0005739);; Biological Process: arginyl-tRNA aminoacylation (GO:0006420);; Cellular Component: chloroplast (GO:0009507);;	K01887|0|cmo:103492270|arginine--tRNA ligase, cytoplasmic-like; K01887 arginyl-tRNA synthetase [EC:6.1.1.19] (A)	[J]	Translation, ribosomal structure and biogenesis	tRNA synthetases class I (R);; DALR anticodon binding domain;; Arginyl tRNA synthetase N terminal domain	--	J	Translation, ribosomal structure and biogenesis	PREDICTED: arginine--tRNA ligase, cytoplasmic-like isoform X1 [Cucumis melo]
F01_c13799/f1p0/1405	[S]	Function unknown	--	K08999|7.97458e-87|cic:CICLE_v10026059mg|hypothetical protein; K08999 hypothetical protein (A)	--	--	Bifunctional nuclease	Bifunctional nuclease 2 GN=BBD2 OS=Arabidopsis thaliana (Mouse-ear cress) PE=2 SV=1	S	Function unknown	PREDICTED: bifunctional nuclease 2-like [Vitis vinifera]
F01_c17041/f2p0/3369	--	--	--	K14400|4.62691e-145|rcu:RCOM_0905380|hypothetical protein; K14400 pre-mRNA cleavage complex 2 protein Pcf11 (A)	[A]	RNA processing and modification	--	Polyadenylation and cleavage factor homolog 4 {ECO:0000305} OS=Arabidopsis thaliana (Mouse-ear cress) PE=1 SV=1	A	RNA processing and modification	PREDICTED: polyadenylation and cleavage factor homolog 4-like isoform X4 [Populus euphratica]
F01_c15788/f1p0/2255	--	--	--	--	[TZ]	--	Formin Homology 2 Domain	Formin-like protein 4 (Precursor) GN=FH4 OS=Arabidopsis thaliana (Mouse-ear cress) PE=1 SV=2	S	Function unknown	unnamed protein product [Vitis vinifera]
F01_c8622/f1p3/1507	[J]	Translation, ribosomal structure and biogenesis	Molecular Function: tryptophan-tRNA ligase activity (GO:0004830);; Molecular Function: ATP binding (GO:0005524);; Cellular Component: cytosol (GO:0005829);; Biological Process: tryptophanyl-tRNA aminoacylation (GO:0006436);; Biological Process: nucleotide biosynthetic process (GO:0009165);;	K01867|0|ath:AT3G04600|tryptophanyl-tRNA synthetase-like protein; K01867 tryptophanyl-tRNA synthetase [EC:6.1.1.2] (A)	[J]	Translation, ribosomal structure and biogenesis	tRNA synthetases class I (W and Y)	--	J	Translation, ribosomal structure and biogenesis	Tryptophan--tRNA ligase, cytoplasmic [Gossypium arboreum]
F01_c6528/f1p1/1768	[R]	General function prediction only	Biological Process: chlorophyll catabolic process (GO:0015996);; Molecular Function: hydrolase activity (GO:0016787);;	--	[R]	General function prediction only	Haloacid dehalogenase-like hydrolase;; haloacid dehalogenase-like hydrolase;; HAD-hyrolase-like	--	R	General function prediction only	hypothetical protein JCGZ_20596 [Jatropha curcas]
F01_c1614/f1p0/940	[IQR]	--	--	--	[R]	General function prediction only	Enoyl-(Acyl carrier protein) reductase	Secoisolariciresinol dehydrogenase (Fragment) OS=Forsythia intermedia (Border forsythia) PE=1 SV=1	Q	Secondary metabolites biosynthesis, transport and catabolism	PREDICTED: secoisolariciresinol dehydrogenase-like [Vitis vinifera]
F01_c13463/f1p4/2553	[I]	Lipid transport and metabolism	Molecular Function: catalytic activity (GO:0003824);; Biological Process: metabolic process (GO:0008152);;	K01897|0|vvi:100247941|probable acyl-activating enzyme 16, chloroplastic; K01897 long-chain acyl-CoA synthetase [EC:6.2.1.3] (A)	[I]	Lipid transport and metabolism	AMP-binding enzyme	Probable acyl-activating enzyme 16, chloroplastic (Precursor) GN=AAE16 OS=Arabidopsis thaliana (Mouse-ear cress) PE=2 SV=1	I	Lipid transport and metabolism	PREDICTED: probable acyl-activating enzyme 16, chloroplastic [Vitis vinifera]
F01_c4810/f1p1/1350	[O]	Posttranslational modification, protein turnover, chaperones	Biological Process: protein folding (GO:0006457);; Biological Process: hyperosmotic response (GO:0006972);; Biological Process: response to heat (GO:0009408);; Biological Process: response to high light intensity (GO:0009644);; Biological Process: response to hydrogen peroxide (GO:0042542);; Molecular Function: unfolded protein binding (GO:0051082);;	K13993|1.08737e-72|vvi:100243983|small heat shock protein 17.3 kDa; K13993 HSP20 family protein (A)	[O]	Posttranslational modification, protein turnover, chaperones	Hsp20/alpha crystallin family	17.9 kDa class II heat shock protein GN=HSP17.9-D OS=Glycine max (Soybean) PE=3 SV=1	O	Posttranslational modification, protein turnover, chaperones	small heat shock protein 17.3 kDa [Vitis vinifera]
F01_c993/f1p0/981	--	--	--	K01892|3.26322e-08|fve:101301462|histidine--tRNA ligase-like; K01892 histidyl-tRNA synthetase [EC:6.1.1.21] (A)	[J]	Translation, ribosomal structure and biogenesis	--	--	J	Translation, ribosomal structure and biogenesis	hypothetical protein MIMGU_mgv1a005185mg [Erythranthe guttata]
F01_c8625/f1p2/2176	--	--	--	--	--	--	Zein-binding	--	S	Function unknown	PREDICTED: uncharacterized protein LOC100250255 isoform X1 [Vitis vinifera]
F01_c15176/f1p5/2515	--	--	Molecular Function: DNA binding (GO:0003677);; Cellular Component: nucleus (GO:0005634);; Biological Process: regulation of transcription, DNA-templated (GO:0006355);; Biological Process: auxin-activated signaling pathway (GO:0009734);; Molecular Function: protein dimerization activity (GO:0046983);;	--	--	--	--	Auxin response factor 6 GN=ARF6 OS=Arabidopsis thaliana (Mouse-ear cress) PE=1 SV=2	K	Transcription	Auxin response factor 6 isoform 2 [Theobroma cacao]
F01_c7090/f1p1/4258	--	--	Molecular Function: transmembrane transporter activity (GO:0022857);; Biological Process: single-organism transport (GO:0044765);;	K15109|4.10174e-11|cit:102609422|mitochondrial arginine transporter BAC2-like; K15109 solute carrier family 25 (mitochondrial carnitine/acylcarnitine transporter), member 20/29 (A)	[C]	Energy production and conversion	--	Mitochondrial arginine transporter BAC2 GN=BAC2 OS=Arabidopsis thaliana (Mouse-ear cress) PE=1 SV=1	C	Energy production and conversion	PREDICTED: mitochondrial arginine transporter BAC2-like [Citrus sinensis]
F01_c4958/f1p2/1355	[GEPR]	--	Cellular Component: integral component of membrane (GO:0016021);; Molecular Function: substrate-specific transmembrane transporter activity (GO:0022891);; Biological Process: transmembrane transport (GO:0055085);;	--	[R]	General function prediction only	Sugar (and other) transporter;; Major Facilitator Superfamily	Sugar transporter ERD6-like 10 GN=At3g05160 OS=Arabidopsis thaliana (Mouse-ear cress) PE=2 SV=1	R	General function prediction only	PREDICTED: sugar transporter ERD6-like 5 isoform X2 [Vitis vinifera]
F01_c5564/f2p10/1191	[LKJ]	--	Molecular Function: RNA binding (GO:0003723);; Molecular Function: ATP binding (GO:0005524);; Cellular Component: nucleus (GO:0005634);; Molecular Function: ATP-dependent helicase activity (GO:0008026);;	K16911|4.47941e-127|vvi:100258263|DEAD-box ATP-dependent RNA helicase 7; K16911 ATP-dependent RNA helicase DDX21 [EC:3.6.4.13] (A)	[A]	RNA processing and modification	GUCT (NUC152) domain;; Helicase conserved C-terminal domain	DEAD-box ATP-dependent RNA helicase 7 GN=RH7 OS=Spinacia oleracea (Spinach) PE=2 SV=1	A	RNA processing and modification	PREDICTED: DEAD-box ATP-dependent RNA helicase 7 [Eucalyptus grandis]
F01_c6464/f2p1/1308	--	--	Cellular Component: mitochondrion (GO:0005739);; Cellular Component: ribosome (GO:0005840);;	--	[C]	Energy production and conversion	ETC complex I subunit conserved region	Probable NADH dehydrogenase [ubiquinone] 1 alpha subcomplex subunit 5, mitochondrial (Precursor) GN=At5g52840 OS=Arabidopsis thaliana (Mouse-ear cress) PE=1 SV=1	J	Translation, ribosomal structure and biogenesis	ribosomal protein S1 [Cucurbita pepo]
F01_c9675/f1p2/2057	--	--	--	K12471|5.77728e-75|vvi:100267012|clathrin interactor EPSIN 2; K12471 epsin (A)	--	--	--	Clathrin interactor EPSIN 2 OS=Arabidopsis thaliana (Mouse-ear cress) PE=1 SV=1	S	Function unknown	PREDICTED: clathrin interactor EPSIN 2 isoform X1 [Vitis vinifera]
F01_c18918/f2p3/1368	[RTKL]	--	Molecular Function: protein serine/threonine kinase activity (GO:0004674);; Molecular Function: ATP binding (GO:0005524);; Biological Process: protein phosphorylation (GO:0006468);;	K04733|0|vvi:100241109|protein kinase 2A, chloroplastic-like; K04733 interleukin-1 receptor-associated kinase 4 [EC:2.7.11.1] (A)	[T]	Signal transduction mechanisms	Protein tyrosine kinase;; Protein kinase domain	Protein kinase 2B, chloroplastic (Precursor) GN=APK2B OS=Arabidopsis thaliana (Mouse-ear cress) PE=2 SV=1	T	Signal transduction mechanisms	PREDICTED: protein kinase 2A, chloroplastic-like [Vitis vinifera]
F01_c3773/f2p0/1006	--	--	--	--	--	--	Lecithin retinol acyltransferase	--	S	Function unknown	NC domain-containing family protein [Populus trichocarpa]
F01_c8816/f5p7/3252	[O]	Posttranslational modification, protein turnover, chaperones	Biological Process: mitotic cell cycle (GO:0000278);; Biological Process: nuclear-transcribed mRNA catabolic process (GO:0000956);; Cellular Component: nucleus (GO:0005634);; Cellular Component: cytosol (GO:0005829);; Biological Process: methylation-dependent chromatin silencing (GO:0006346);; Biological Process: RNA processing (GO:0006396);; Biological Process: protein glycosylation (GO:0006486)…	--	[GOT]	--	Tetratricopeptide repeat;; TPR repeat;; Glycosyl transferase family 41;; Tetratricopeptide repeat;; Tetratricopeptide repeat;; Tetratricopeptide repeat;; Tetratricopeptide repeat;; Tetratricopeptide repeat;; Tetratricopeptide repeat;; Tetratricopeptide repeat;; Tetratricopeptide repeat;; Tetratricopeptide repeat;; Tetratricopeptide repeat;; Tetratricopeptide repeat;; Est1 DNA/RNA binding domain;;…	Probable UDP-N-acetylglucosamine--peptide N-acetylglucosaminyltransferase SPINDLY GN=SPY OS=Petunia hybrida (Petunia) PE=2 SV=1	O	Posttranslational modification, protein turnover, chaperones	PREDICTED: probable UDP-N-acetylglucosamine--peptide N-acetylglucosaminyltransferase SPINDLY-like isoform X4 [Citrus sinensis]
F01_c1578/f1p0/990	--	--	Biological Process: pentose-phosphate shunt (GO:0006098);; Biological Process: rRNA processing (GO:0006364);; Biological Process: tetrahydrobiopterin biosynthetic process (GO:0006729);; Molecular Function: 4-alpha-hydroxytetrahydrobiopterin dehydratase activity (GO:0008124);; Biological Process: aromatic amino acid family biosynthetic process (GO:0009073);; Biological Process: chloroplast relocat…	--	--	--	Pterin 4 alpha carbinolamine dehydratase	--	S	Function unknown	PREDICTED: uncharacterized protein LOC103953705 [Pyrus x bretschneideri]
F01_c2734/f2p3/1094	[O]	Posttranslational modification, protein turnover, chaperones	Molecular Function: iron ion binding (GO:0005506);; Molecular Function: copper ion binding (GO:0005507);; Molecular Function: ATP binding (GO:0005524);; Cellular Component: mitochondrion (GO:0005739);; Biological Process: iron-sulfur cluster assembly (GO:0016226);; Molecular Function: iron-sulfur cluster binding (GO:0051536);;	--	[O]	Posttranslational modification, protein turnover, chaperones	NifU-like domain	NifU-like protein 4, mitochondrial (Precursor) GN=MFD22.10 OS=Arabidopsis thaliana (Mouse-ear cress) PE=2 SV=1	O	Posttranslational modification, protein turnover, chaperones	hypothetical protein JCGZ_18623 [Jatropha curcas]
F01_c7569/f1p1/1188	[R]	General function prediction only	Biological Process: RNA methylation (GO:0001510);; Molecular Function: GTP binding (GO:0005525);; Cellular Component: nucleolus (GO:0005730);; Cellular Component: plasmodesma (GO:0009506);; Biological Process: maintenance of inflorescence meristem identity (GO:0010077);; Biological Process: negative regulation of transcription, DNA-templated (GO:0045892);; Biological Process: floral organ morphog…	K14538|2.98905e-175|pop:POPTR_0002s24220g|POPTRDRAFT_645400; hypothetical protein; K14538 nuclear GTP-binding protein (A)	[R]	General function prediction only	50S ribosome-binding GTPase;; Ferrous iron transport protein B	Guanine nucleotide-binding protein-like NSN1 {ECO:0000305} OS=Arabidopsis thaliana (Mouse-ear cress) PE=2 SV=1	R	General function prediction only	hypothetical protein JCGZ_17559 [Jatropha curcas]
F01_c5549/f1p0/3628	[C]	Energy production and conversion	Molecular Function: D-lactate dehydrogenase (cytochrome) activity (GO:0004458);; Molecular Function: ATP binding (GO:0005524);; Molecular Function: UDP-N-acetylmuramate dehydrogenase activity (GO:0008762);; Molecular Function: glycolate oxidase activity (GO:0008891);; Molecular Function: glycolate dehydrogenase activity (GO:0019154);; Molecular Function: identical protein binding (GO:0042802);; M…	K00102|8.651e-86|vvi:100242784|D-lactate dehydrogenase [cytochrome], mitochondrial; K00102 D-lactate dehydrogenase (cytochrome) [EC:1.1.2.4] (A)	[C]	Energy production and conversion	NADH-Ubiquinone/plastoquinone (complex I), various chains	D-lactate dehydrogenase [cytochrome], mitochondrial (Precursor) GN=F15M7.11 OS=Arabidopsis thaliana (Mouse-ear cress) PE=1 SV=1	C	Energy production and conversion	hypothetical protein JCGZ_03071 [Jatropha curcas]
F01_c12155/f2p0/2003	--	--	--	K06207|3.72063e-20|tcc:TCM_024725|Elongation factor family protein isoform 1; K06207 GTP-binding protein (A)	[J]	Translation, ribosomal structure and biogenesis	--	Cystathionine gamma-synthase 1, chloroplastic {ECO:0000305} (Precursor) GN=At3g01120 OS=Arabidopsis thaliana (Mouse-ear cress) PE=1 SV=3	J	Translation, ribosomal structure and biogenesis	Elongation factor family protein isoform 5, partial [Theobroma cacao]
F01_c10613/f1p0/3284	--	--	Molecular Function: nucleotide binding (GO:0000166);; Molecular Function: RNA binding (GO:0003723);; Cellular Component: nucleus (GO:0005634);; Biological Process: RNA processing (GO:0006396);; Cellular Component: ribonucleoprotein complex (GO:0030529);;	K15191|2.49322e-86|pper:PRUPE_ppa024894mg|hypothetical protein; K15191 La-related protein 7 (A)	[R]	General function prediction only	La domain;; RNA recognition motif. (a.k.a. RRM, RBD, or RNP domain)	La-related protein 6C GN=LARP6C OS=Arabidopsis thaliana (Mouse-ear cress) PE=3 SV=1	R	General function prediction only	hypothetical protein PRUPE_ppa024894mg [Prunus persica]
F01_c16005/f1p11/3119	[G]	Carbohydrate transport and metabolism	Molecular Function: phosphoglycerate kinase activity (GO:0004618);; Cellular Component: nucleus (GO:0005634);; Cellular Component: vacuolar membrane (GO:0005774);; Cellular Component: cytosol (GO:0005829);; Cellular Component: plasma membrane (GO:0005886);; Biological Process: glycolytic process (GO:0006096);; Cellular Component: plasmodesma (GO:0009506);; Cellular Component: chloroplast stroma (…	K00927|4.37674e-29|pvu:PHAVU_005G050800g|hypothetical protein; K00927 phosphoglycerate kinase [EC:2.7.2.3] (A)	[G]	Carbohydrate transport and metabolism	Phosphoglycerate kinase	Phosphoglycerate kinase, cytosolic OS=Triticum aestivum (Wheat) PE=2 SV=1	G	Carbohydrate transport and metabolism	phosphoglycerate kinase like protein [Arabidopsis thaliana]
F01_c14871/f1p3/2002	[GEPR]	--	Molecular Function: sugar:proton symporter activity (GO:0005351);; Cellular Component: plasma membrane (GO:0005886);; Cellular Component: integral component of membrane (GO:0016021);; Biological Process: carbohydrate transmembrane transport (GO:0034219);;	--	[R]	General function prediction only	Sugar (and other) transporter	Sugar transport protein 7 GN=STP7 OS=Arabidopsis thaliana (Mouse-ear cress) PE=2 SV=1	R	General function prediction only	hexose transport protein [Actinidia chinensis]
F01_c17115/f1p0/3105	--	--	--	--	[R]	General function prediction only	PPR repeat;; PPR repeat family;; PPR repeat;; Pentatricopeptide repeat domain	Pentatricopeptide repeat-containing protein At5g16860 GN=PCMP-H92 OS=Arabidopsis thaliana (Mouse-ear cress) PE=2 SV=1	R	General function prediction only	PREDICTED: pentatricopeptide repeat-containing protein At5g16860 [Vitis vinifera]
F01_c9212/f1p0/1164	--	--	Biological Process: mRNA processing (GO:0006397);;	K10523|0|vvi:100258076|BTB/POZ and MATH domain-containing protein 2-like; K10523 speckle-type POZ protein (A)	[DR]	--	BTB/POZ domain	BTB/POZ and MATH domain-containing protein 2 GN=BPM2 OS=Arabidopsis thaliana (Mouse-ear cress) PE=1 SV=1	D	Cell cycle control, cell division, chromosome partitioning	PREDICTED: BTB/POZ and MATH domain-containing protein 2-like [Vitis vinifera]
F01_c10004/f1p0/1468	--	--	--	--	--	--	Plant protein of unknown function (DUF822)	BES1/BZR1 homolog protein 4 GN=BEH4 OS=Arabidopsis thaliana (Mouse-ear cress) PE=1 SV=1	S	Function unknown	PREDICTED: BES1/BZR1 homolog protein 4 [Vitis vinifera]
F01_c13188/f1p2/1311	[M]	Cell wall/membrane/envelope biogenesis	Molecular Function: UDP-glucose 4-epimerase activity (GO:0003978);; Cellular Component: Golgi apparatus (GO:0005794);; Cellular Component: cytosol (GO:0005829);; Cellular Component: plasma membrane (GO:0005886);; Biological Process: cellular metabolic process (GO:0044237);; Biological Process: galactose biosynthetic process (GO:0046369);; Molecular Function: protein dimerization activity (GO:0046…	K01784|0|pop:POPTR_0003s12380g|POPTRDRAFT_817341; UDP-glucose 4-epimerase family protein; K01784 UDP-glucose 4-epimerase [EC:5.1.3.2] (A)	[M]	Cell wall/membrane/envelope biogenesis	NAD dependent epimerase/dehydratase family;; UDP-glucose 4-epimerase C-term subunit;; Polysaccharide biosynthesis protein;; 3-beta hydroxysteroid dehydrogenase/isomerase family;; short chain dehydrogenase;; RmlD substrate binding domain;; Male sterility protein;; NADH(P)-binding;; KR domain	Bifunctional UDP-glucose 4-epimerase and UDP-xylose 4-epimerase 1 GN=UGE1 OS=Arabidopsis thaliana (Mouse-ear cress) PE=1 SV=2	M	Cell wall/membrane/envelope biogenesis	hypothetical protein F383_09826 [Gossypium arboreum]
F01_c8940/f1p26/3459	[M]	Cell wall/membrane/envelope biogenesis	Biological Process: sucrose metabolic process (GO:0005985);; Biological Process: biosynthetic process (GO:0009058);; Biological Process: nodulation (GO:0009877);; Molecular Function: sucrose synthase activity (GO:0016157);;	K00695|0|vvi:100249279|sucrose synthase; K00695 sucrose synthase [EC:2.4.1.13] (A)	[M]	Cell wall/membrane/envelope biogenesis	Sucrose synthase	Sucrose synthase GN=SS OS=Glycine max (Soybean) PE=1 SV=2	M	Cell wall/membrane/envelope biogenesis	PREDICTED: sucrose synthase [Vitis vinifera]
F01_c18361/f7p6/1319	[G]	Carbohydrate transport and metabolism	Molecular Function: triose-phosphate isomerase activity (GO:0004807);; Biological Process: glycolytic process (GO:0006096);;	K01803|7.90414e-134|sot:102583463|triosephosphate isomerase, chloroplastic-like; K01803 triosephosphate isomerase (TIM) [EC:5.3.1.1] (A)	[G]	Carbohydrate transport and metabolism	Triosephosphate isomerase	Triosephosphate isomerase, chloroplastic (Precursor) GN=TIM OS=Arabidopsis thaliana (Mouse-ear cress) PE=1 SV=1	G	Carbohydrate transport and metabolism	PREDICTED: triosephosphate isomerase, chloroplastic-like [Solanum tuberosum]
F01_c5513/f3p1/3397	[R]	General function prediction only	Cellular Component: cytosol (GO:0005829);;	K03255|0|vvi:100254354|clustered mitochondria protein homolog; K03255 protein TIF31 (A)	[R]	General function prediction only	Translation initiation factor eIF3 subunit 135;; Tetratricopeptide repeat;; Tetratricopeptide repeat;; TPR repeat;; Tetratricopeptide repeat;; Tetratricopeptide repeat	Clustered mitochondria protein GN=F4F15.250 OS=Arabidopsis thaliana (Mouse-ear cress) PE=2 SV=1	R	General function prediction only	PREDICTED: clustered mitochondria protein homolog [Vitis vinifera]
F01_c4956/f1p0/1398	--	--	--	--	--	--	--	Pentatricopeptide repeat-containing protein At3g03580 GN=PCMP-H23 OS=Arabidopsis thaliana (Mouse-ear cress) PE=2 SV=1	R	General function prediction only	PREDICTED: pentatricopeptide repeat-containing protein At3g03580-like [Fragaria vesca subsp. vesca]
F01_c16444/f1p12/3452	--	--	--	--	--	--	--	--	R	General function prediction only	PREDICTED: transcription initiation factor TFIID subunit 15b [Vitis vinifera]
F01_c13267/f1p1/1962	[H]	Coenzyme transport and metabolism	Biological Process: maltose metabolic process (GO:0000023);; Molecular Function: ferrochelatase activity (GO:0004325);; Biological Process: pentose-phosphate shunt (GO:0006098);; Biological Process: heme biosynthetic process (GO:0006783);; Biological Process: carotenoid biosynthetic process (GO:0016117);; Biological Process: methylglyoxal catabolic process to D-lactate (GO:0019243);; Biological P…	K01772|0|vvi:100254236|ferrochelatase-2, chloroplastic; K01772 ferrochelatase [EC:4.99.1.1] (A)	[H]	Coenzyme transport and metabolism	Ferrochelatase	Ferrochelatase-2, chloroplastic (Precursor) GN=HEMH OS=Oryza sativa subsp. indica (Rice) PE=2 SV=2	H	Coenzyme transport and metabolism	PREDICTED: ferrochelatase-2, chloroplastic [Vitis vinifera]
F01_c10031/f1p1/1152	[G]	Carbohydrate transport and metabolism	Biological Process: biosynthetic process (GO:0009058);; Molecular Function: strictosidine synthase activity (GO:0016844);;	--	[R]	General function prediction only	Strictosidine synthase	Protein STRICTOSIDINE SYNTHASE-LIKE 4 {ECO:0000303|PubMed:10777701} (Precursor) OS=Arabidopsis thaliana (Mouse-ear cress) PE=1 SV=1	R	General function prediction only	PREDICTED: protein YLS2-like [Populus euphratica]
F01_c16210/f1p1/2504	--	--	Cellular Component: peroxisome (GO:0005777);; Molecular Function: phosphotransferase activity, alcohol group as acceptor (GO:0016773);;	--	[T]	Signal transduction mechanisms	Phosphatidylinositol 3- and 4-kinase	Phosphatidylinositol 4-kinase gamma 3 GN=PI4KG3 OS=Arabidopsis thaliana (Mouse-ear cress) PE=2 SV=1	O	Posttranslational modification, protein turnover, chaperones	hypothetical protein PRUPE_ppa017046mg [Prunus persica]
F01_c9205/f2p5/2629	--	--	Molecular Function: DNA binding (GO:0003677);;	--	[K]	Transcription	Associated with HOX;; Homeobox KN domain;; Homeobox domain	BEL1-like homeodomain protein 1 GN=F11F19.15 OS=Arabidopsis thaliana (Mouse-ear cress) PE=1 SV=1	K	Transcription	PREDICTED: BEL1-like homeodomain protein 1 [Vitis vinifera]
F01_c1700/f15p11/1381	[R]	General function prediction only	Molecular Function: chitinase activity (GO:0004568);; Biological Process: carbohydrate metabolic process (GO:0005975);; Biological Process: chitin catabolic process (GO:0006032);; Biological Process: cell wall macromolecule catabolic process (GO:0016998);;	--	[R]	General function prediction only	Chitinase class I	Chitinase-like protein 1 (Precursor) GN=At1g05850 OS=Arabidopsis thaliana (Mouse-ear cress) PE=1 SV=1	R	General function prediction only	PREDICTED: chitinase-like protein 1 [Prunus mume]
F01_c7989/f1p0/2676	[G]	Carbohydrate transport and metabolism	Molecular Function: glucosylceramidase activity (GO:0004348);; Cellular Component: Golgi apparatus (GO:0005794);; Cellular Component: plasma membrane (GO:0005886);; Biological Process: glucosylceramide catabolic process (GO:0006680);; Cellular Component: integral component of membrane (GO:0016021);;	K17108|7.88105e-175|pmum:103318985|non-lysosomal glucosylceramidase; K17108 non-lysosomal glucosylceramidase [EC:3.2.1.45] (A)	[G]	Carbohydrate transport and metabolism	Protein of unknown function, DUF608	--	G	Carbohydrate transport and metabolism	PREDICTED: non-lysosomal glucosylceramidase [Prunus mume]
F01_c11932/f1p3/2306	[R]	General function prediction only	Molecular Function: GTPase activity (GO:0003924);; Molecular Function: calcium ion binding (GO:0005509);; Molecular Function: GTP binding (GO:0005525);; Cellular Component: mitochondrial outer membrane (GO:0005741);; Biological Process: GTP catabolic process (GO:0006184);; Biological Process: small GTPase mediated signal transduction (GO:0007264);; Biological Process: response to abscisic acid (G…	K07870|0|vvi:100245854|mitochondrial Rho GTPase 1; K07870 Ras homolog gene family, member T1 (A)	[V]	Defense mechanisms	Miro-like protein;; EF hand associated;; Ras family;; EF hand associated;; 50S ribosome-binding GTPase;; Archaeal ATPase	Rac-like GTP-binding protein ARAC3 (Precursor) GN=M4E13.80 OS=Arabidopsis thaliana (Mouse-ear cress) PE=1 SV=1	V	Defense mechanisms	PREDICTED: mitochondrial Rho GTPase 1 [Vitis vinifera]
F01_c17179/f1p1/1273	--	--	Biological Process: G-protein coupled receptor signaling pathway (GO:0007186);; Cellular Component: photosystem II (GO:0009523);; Cellular Component: plastid outer membrane (GO:0009527);; Cellular Component: plastid inner membrane (GO:0009528);; Cellular Component: chloroplast thylakoid membrane (GO:0009535);; Cellular Component: chloroplast stroma (GO:0009570);; Cellular Component: chloroplast e…	--	--	--	Thylakoid formation protein	Protein THYLAKOID FORMATION1, chloroplastic (Precursor) GN=THF1 OS=Solanum tuberosum (Potato) PE=2 SV=1	U	Intracellular trafficking, secretion, and vesicular transport	PREDICTED: protein THYLAKOID FORMATION1, chloroplastic-like [Malus domestica]
F01_c3071/f3p2/1111	[I]	Lipid transport and metabolism	Cellular Component: membrane (GO:0016020);; Molecular Function: kinase activity (GO:0016301);; Biological Process: phosphorylation (GO:0016310);;	K15892|3.81495e-131|rcu:RCOM_1474470|Phytol kinase 1, chloroplast precursor, putative; K15892 farnesol kinase [EC:2.7.1.-] (A)	[S]	Function unknown	Cytidylyltransferase family	Probable phytol kinase 2, chloroplastic (Precursor) GN=At5g58560 OS=Arabidopsis thaliana (Mouse-ear cress) PE=2 SV=2	S	Function unknown	putative phytol kinase 3, chloroplastic [Gossypium arboreum]
F01_c8216/f1p16/3297	[O]	Posttranslational modification, protein turnover, chaperones	--	--	[O]	Posttranslational modification, protein turnover, chaperones	Ubiquitin family	Ubiquitin domain-containing protein DSK2b GN=DSK2B OS=Arabidopsis thaliana (Mouse-ear cress) PE=1 SV=1	O	Posttranslational modification, protein turnover, chaperones	Ubiquitin-like superfamily protein, putative isoform 2 [Theobroma cacao]
F01_c7120/f2p6/1857	[OC]	--	Biological Process: cell redox homeostasis (GO:0045454);; Molecular Function: protein-disulfide reductase activity (GO:0047134);; Biological Process: oxidation-reduction process (GO:0055114);;	K17609|0|pmum:103321774|probable nucleoredoxin 1; K17609 nucleoredoxin [EC:1.8.1.8] (A)	[R]	General function prediction only	Thioredoxin-like;; AhpC/TSA family;; Redoxin;; Thioredoxin-like domain;; Thioredoxin	Probable nucleoredoxin 1 GN=At1g60420 OS=Arabidopsis thaliana (Mouse-ear cress) PE=1 SV=1	O	Posttranslational modification, protein turnover, chaperones	hypothetical protein VITISV_008818 [Vitis vinifera]
F01_c15291/f1p1/1362	[RTKL]	--	Molecular Function: protein serine/threonine kinase activity (GO:0004674);; Molecular Function: ATP binding (GO:0005524);; Biological Process: protein phosphorylation (GO:0006468);;	K14498|0|rcu:RCOM_0855720|Serine/threonine-protein kinase SAPK3, putative (EC:2.7.11.1); K14498 serine/threonine-protein kinase SRK2 [EC:2.7.11.1] (A)	[T]	Signal transduction mechanisms	Protein kinase domain;; Protein tyrosine kinase	Serine/threonine-protein kinase SAPK3 GN=OSJNBa0027P10.6 OS=Oryza sativa subsp. japonica (Rice) PE=1 SV=1	T	Signal transduction mechanisms	hypothetical protein JCGZ_17137 [Jatropha curcas]
F01_c5931/f1p3/4007	[KL]	--	Molecular Function: organic cyclic compound binding (GO:0097159);; Molecular Function: heterocyclic compound binding (GO:1901363);;	K10875|0|vvi:100267731|SNF2 domain-containing protein CLASSY 3-like; K10875 DNA repair and recombination protein RAD54 and RAD54-like protein [EC:3.6.4.-] (A)	[L]	Replication, recombination and repair	--	SNF2 domain-containing protein CLASSY 3 GN=At1g05490 OS=Arabidopsis thaliana (Mouse-ear cress) PE=1 SV=1	L	Replication, recombination and repair	PREDICTED: SNF2 domain-containing protein CLASSY 3-like [Vitis vinifera]
F01_c13956/f1p7/2708	--	--	Cellular Component: cytosol (GO:0005829);; Biological Process: regulation of transcription, DNA-templated (GO:0006355);; Biological Process: cell surface receptor signaling pathway (GO:0007166);; Biological Process: response to chitin (GO:0010200);; Molecular Function: transferase activity, transferring glycosyl groups (GO:0016757);; Molecular Function: transferase activity, transferring phosphor…	--	[BT]	--	Cupin-like domain;; JmjC domain, hydroxylase	F-box protein At1g78280 GN=At1g78280 OS=Arabidopsis thaliana (Mouse-ear cress) PE=2 SV=3	3400	F-box protein	PREDICTED: F-box protein At1g78280 isoform X1 [Vitis vinifera]
F01_c5186/f1p12/2249	--	--	Molecular Function: GTPase activity (GO:0003924);; Molecular Function: signal transducer activity (GO:0004871);; Molecular Function: GTP binding (GO:0005525);; Biological Process: GTP catabolic process (GO:0006184);; Biological Process: G-protein coupled receptor signaling pathway (GO:0007186);; Molecular Function: G-protein beta/gamma-subunit complex binding (GO:0031683);;	--	[DT]	--	G-protein alpha subunit	Extra-large guanine nucleotide-binding protein 1 GN=F26B6.11 OS=Arabidopsis thaliana (Mouse-ear cress) PE=1 SV=2	1416	G_alpha	unnamed protein product [Vitis vinifera]
F01_c3614/f2p0/1833	--	--	Biological Process: metabolic process (GO:0008152);; Molecular Function: terpene synthase activity (GO:0010333);; Molecular Function: metal ion binding (GO:0046872);;	--	--	--	Terpene synthase, N-terminal domain	(-)-germacrene D synthase OS=Vitis vinifera (Grape) PE=1 SV=1	R	General function prediction only	germacrene A synthase [Vitis vinifera]
F01_c7649/f1p4/2197	--	--	Biological Process: DNA replication initiation (GO:0006270);; Biological Process: premeiotic DNA replication (GO:0006279);; Biological Process: DNA methylation (GO:0006306);; Biological Process: cell proliferation (GO:0008283);; Biological Process: gametophyte development (GO:0048229);; Biological Process: histone H3-K9 methylation (GO:0051567);;	K06628|0|vvi:100253995|cell division control protein 45 homolog; K06628 cell division control protein 45 (A)	[L]	Replication, recombination and repair	CDC45-like protein	--	L	Replication, recombination and repair	Cell division control protein 45-like protein [Morus notabilis]
F01_c9163/f1p5/3525	--	--	--	--	[K]	Transcription	Double-stranded RNA binding motif;; NLI interacting factor-like phosphatase	RNA polymerase II C-terminal domain phosphatase-like 1 GN=F17L22.130 OS=Arabidopsis thaliana (Mouse-ear cress) PE=1 SV=1	K	Transcription	PREDICTED: RNA polymerase II C-terminal domain phosphatase-like 1 [Vitis vinifera]
F01_c5201/f1p0/3030	--	--	--	--	--	--	--	Probable LRR receptor-like serine/threonine-protein kinase MRH1 (Precursor) GN=MRH1 OS=Arabidopsis thaliana (Mouse-ear cress) PE=2 SV=1	T	Signal transduction mechanisms	Leucine-rich repeat protein kinase family protein, putative isoform 1 [Theobroma cacao]
F01_c2489/f2p0/1010	[D]	Cell cycle control, cell division, chromosome partitioning	Biological Process: meiotic cell cycle (GO:0051321);;	K06627|1.39187e-61|pper:PRUPE_ppa004701mg|hypothetical protein; K06627 cyclin A (A)	[D]	Cell cycle control, cell division, chromosome partitioning	Cyclin, C-terminal domain	Cyclin-A1-1 GN=CYCA1-1 OS=Arabidopsis thaliana (Mouse-ear cress) PE=1 SV=1	D	Cell cycle control, cell division, chromosome partitioning	hypothetical protein PRUPE_ppa004701mg [Prunus persica]
F01_c4959/f1p0/1630	--	--	--	--	--	--	P21-Rho-binding domain	CRIB domain-containing protein RIC10 GN=RIC10 OS=Arabidopsis thaliana (Mouse-ear cress) PE=2 SV=1	S	Function unknown	PREDICTED: CRIB domain-containing protein RIC10 [Vitis vinifera]
F01_c17465/f6p8/2383	--	--	Biological Process: transmembrane transport (GO:0055085);;	--	[T]	Signal transduction mechanisms	OPT oligopeptide transporter protein	Oligopeptide transporter 3 GN=OPT3 OS=Arabidopsis thaliana (Mouse-ear cress) PE=2 SV=3	P	Inorganic ion transport and metabolism	Oligopeptide transporter isoform 1 [Theobroma cacao]
F01_c3626/f1p0/2394	[RTKL]	--	Molecular Function: protein kinase activity (GO:0004672);; Molecular Function: ATP binding (GO:0005524);; Biological Process: protein phosphorylation (GO:0006468);; Cellular Component: chloroplast (GO:0009507);; Biological Process: organ senescence (GO:0010260);;	--	[T]	Signal transduction mechanisms	Protein kinase domain;; Protein tyrosine kinase	E3 ubiquitin-protein ligase KEG GN=KEG OS=Arabidopsis thaliana (Mouse-ear cress) PE=1 SV=2	T	Signal transduction mechanisms	hypothetical protein PRUPE_ppa002807mg [Prunus persica]
F01_c9208/f2p0/3392	--	--	Biological Process: defense response (GO:0006952);; Biological Process: signal transduction (GO:0007165);; Biological Process: metabolic process (GO:0008152);; Cellular Component: plastid (GO:0009536);; Biological Process: response to organic substance (GO:0010033);;	--	[R]	General function prediction only	--	Chlorophyll(ide) b reductase NOL, chloroplastic (Precursor) OS=Oryza sativa subsp. japonica (Rice) PE=1 SV=1	S	Function unknown	PREDICTED: uncharacterized protein LOC101311801 [Fragaria vesca subsp. vesca]
F01_c8346/f1p2/2764	--	--	Biological Process: primary metabolic process (GO:0044238);; Biological Process: cellular biosynthetic process (GO:0044249);; Biological Process: single-organism process (GO:0044699);; Biological Process: organic substance biosynthetic process (GO:1901576);;	--	--	--	B3 DNA binding domain	B3 domain-containing transcription factor ABI3 GN=ABI3 OS=Arabidopsis thaliana (Mouse-ear cress) PE=1 SV=1	K	Transcription	ABI3, putative isoform 1 [Theobroma cacao]
F01_c2420/f2p1/1058	[R]	General function prediction only	--	K12881|1.94747e-52|tcc:TCM_021972|RNA-binding family protein; K12881 THO complex subunit 4 (A)	[A]	RNA processing and modification	RNA recognition motif. (a.k.a. RRM, RBD, or RNP domain);; RNA recognition motif (a.k.a. RRM, RBD, or RNP domain);; RNA recognition motif. (a.k.a. RRM, RBD, or RNP domain)	THO complex subunit 4B GN=ALY2 OS=Arabidopsis thaliana (Mouse-ear cress) PE=1 SV=1	A	RNA processing and modification	hypothetical protein JCGZ_01496 [Jatropha curcas]
F01_c17898/f1p0/1011	[J]	Translation, ribosomal structure and biogenesis	Molecular Function: structural constituent of ribosome (GO:0003735);; Cellular Component: ribosome (GO:0005840);; Biological Process: translation (GO:0006412);; Cellular Component: chloroplast stroma (GO:0009570);; Cellular Component: thylakoid (GO:0009579);; Biological Process: embryo development ending in seed dormancy (GO:0009793);; Cellular Component: chloroplast envelope (GO:0009941);; Biolo…	K02871|1.33274e-121|vvi:100248623|50S ribosomal protein L13, chloroplastic; K02871 large subunit ribosomal protein L13 (A)	[J]	Translation, ribosomal structure and biogenesis	Ribosomal protein L13	50S ribosomal protein L13, chloroplastic (Precursor) GN=T30F21.4 OS=Arabidopsis thaliana (Mouse-ear cress) PE=2 SV=1	J	Translation, ribosomal structure and biogenesis	PREDICTED: 50S ribosomal protein L13, chloroplastic [Vitis vinifera]
F01_c1609/f7p3/3524	--	--	Biological Process: protein import into nucleus, docking (GO:0000059);; Biological Process: microtubule cytoskeleton organization (GO:0000226);; Biological Process: cytokinesis by cell plate formation (GO:0000911);; Cellular Component: nuclear pore (GO:0005643);; Cellular Component: cytoplasm (GO:0005737);; Molecular Function: Ran GTPase binding (GO:0008536);; Molecular Function: protein transpor…	--	[UY]	--	Importin-beta N-terminal domain;; HEAT-like repeat;; Exportin 1-like protein;; HEAT repeat;; Protein of unknown function (DUF2454)	--	2827	IBN_N	PREDICTED: importin-9 [Vitis vinifera]
F01_c17240/f1p2/1035	--	--	Cellular Component: nucleus (GO:0005634);; Biological Process: ribosome biogenesis (GO:0042254);;	K14852|2.54785e-85|sly:101263184|ribosome biogenesis regulatory protein homolog; K14852 regulator of ribosome biosynthesis (A)	[J]	Translation, ribosomal structure and biogenesis	Ribosome biogenesis regulatory protein (RRS1)	Ribosome biogenesis regulatory protein homolog GN=At2g37990 OS=Arabidopsis thaliana (Mouse-ear cress) PE=2 SV=2	J	Translation, ribosomal structure and biogenesis	PREDICTED: ribosome biogenesis regulatory protein homolog [Sesamum indicum]
F01_c1499/f5p3/1721	--	--	Cellular Component: proteasome complex (GO:0000502);; Cellular Component: nucleus (GO:0005634);; Cellular Component: cytoplasm (GO:0005737);; Biological Process: multicellular organismal development (GO:0007275);;	K03035|0|pda:103712963|26S proteasome non-ATPase regulatory subunit 12 homolog A; K03035 26S proteasome regulatory subunit N5 (A)	[O]	Posttranslational modification, protein turnover, chaperones	PCI domain	26S proteasome non-ATPase regulatory subunit 12 homolog A GN=MYH9.11 OS=Arabidopsis thaliana (Mouse-ear cress) PE=1 SV=1	O	Posttranslational modification, protein turnover, chaperones	PREDICTED: 26S proteasome non-ATPase regulatory subunit 12 homolog A isoform X2 [Phoenix dactylifera]
F01_c577/f1p33/955	[O]	Posttranslational modification, protein turnover, chaperones	Molecular Function: ATP binding (GO:0005524);; Cellular Component: cell wall (GO:0005618);; Cellular Component: nuclear envelope (GO:0005635);; Cellular Component: nucleolus (GO:0005730);; Cellular Component: spindle (GO:0005819);; Cellular Component: plasma membrane (GO:0005886);; Molecular Function: microtubule-severing ATPase activity (GO:0008568);; Cellular Component: phragmoplast (GO:0009524…	K13525|3.76909e-142|rcu:RCOM_1509640|Transitional endoplasmic reticulum ATPase, putative (EC:3.6.4.3); K13525 transitional endoplasmic reticulum ATPase (A)	[O]	Posttranslational modification, protein turnover, chaperones	ATPase family associated with various cellular activities (AAA);; Vps4 C terminal oligomerisation domain	Cell division cycle protein 48 homolog GN=CDC48 OS=Glycine max (Soybean) PE=1 SV=1	O	Posttranslational modification, protein turnover, chaperones	PREDICTED: cell division cycle protein 48 homolog isoform X3 [Populus euphratica]
F01_c16296/f1p0/1786	[R]	General function prediction only	Biological Process: lipid metabolic process (GO:0006629);; Molecular Function: hydrolase activity (GO:0016787);;	--	[I]	Lipid transport and metabolism	Patatin-like phospholipase	Patatin-like protein 2 GN=PLP2 OS=Arabidopsis thaliana (Mouse-ear cress) PE=1 SV=1	I	Lipid transport and metabolism	unnamed protein product [Vitis vinifera]
F01_c4230/f1p0/1765	[L]	Replication, recombination and repair	Molecular Function: catalytic activity (GO:0003824);; Biological Process: DNA repair (GO:0006281);;	K01246|3.60517e-128|gmx:100791725|uncharacterized LOC100791725; K01246 DNA-3-methyladenine glycosylase I [EC:3.2.2.20] (A)	--	--	Methyladenine glycosylase	--	L	Replication, recombination and repair	PREDICTED: uncharacterized protein LOC105118177 [Populus euphratica]
F01_c6674/f1p1/1736	--	--	Cellular Component: Golgi apparatus (GO:0005794);; Cellular Component: plant-type cell wall (GO:0009505);;	--	--	--	GDP-fucose protein O-fucosyltransferase	Uncharacterized protein At1g04910 GN=At1g04910 OS=Arabidopsis thaliana (Mouse-ear cress) PE=2 SV=1	S	Function unknown	hypothetical protein JCGZ_11916 [Jatropha curcas]
F01_c9207/f1p6/1104	--	--	Biological Process: protein targeting to vacuole (GO:0006623);; Biological Process: vesicle-mediated transport (GO:0016192);;	--	[R]	General function prediction only	Domain of unknown function (DUF814)	--	R	General function prediction only	PREDICTED: coiled-coil domain-containing protein 25 [Vitis vinifera]
F01_c21494/f2p2/3293	--	--	Molecular Function: nucleic acid binding (GO:0003676);; Molecular Function: zinc ion binding (GO:0008270);;	--	--	--	MuDR family transposase;; MULE transposase domain;; SWIM zinc finger	--	R	General function prediction only	PREDICTED: uncharacterized protein LOC100258751 [Vitis vinifera]
F01_c12957/f1p4/2638	[V]	Defense mechanisms	Molecular Function: ATP binding (GO:0005524);; Biological Process: ATP catabolic process (GO:0006200);; Biological Process: response to wounding (GO:0009611);; Biological Process: response to salt stress (GO:0009651);; Biological Process: response to abscisic acid (GO:0009737);; Cellular Component: external side of plasma membrane (GO:0009897);; Molecular Function: fatty acid transporter activity…	--	[Q]	Secondary metabolites biosynthesis, transport and catabolism	--	ABC transporter G family member 11 GN=At1g17840 OS=Arabidopsis thaliana (Mouse-ear cress) PE=1 SV=1	Q	Secondary metabolites biosynthesis, transport and catabolism	ATP-binding cassette transporter, putative [Ricinus communis]
F01_c2917/f5p5/1491	[C]	Energy production and conversion	Biological Process: response to hypoxia (GO:0001666);; Molecular Function: alcohol dehydrogenase (NAD) activity (GO:0004022);; Cellular Component: cytosol (GO:0005829);; Cellular Component: plasma membrane (GO:0005886);; Molecular Function: zinc ion binding (GO:0008270);; Biological Process: response to salt stress (GO:0009651);; Biological Process: response to cadmium ion (GO:0046686);; Molecula…	K18857|0|vvi:100255814|alcohol dehydrogenase 1; K18857 alcohol dehydrogenase class-P [EC:1.1.1.1] (A)	[Q]	Secondary metabolites biosynthesis, transport and catabolism	Alcohol dehydrogenase GroES-like domain;; Zinc-binding dehydrogenase	Alcohol dehydrogenase GN=ADH OS=Malus domestica (Apple) PE=2 SV=1	Q	Secondary metabolites biosynthesis, transport and catabolism	PREDICTED: alcohol dehydrogenase 1 [Vitis vinifera]
F01_c11211/f2p5/2453	[BK]	--	--	--	[K]	Transcription	Bromodomain	Transcription factor GTE4 GN=GTE4 OS=Arabidopsis thaliana (Mouse-ear cress) PE=2 SV=1	K	Transcription	PREDICTED: transcription factor GTE7 [Cucumis melo]
F01_c5119/f1p27/3375	[J]	Translation, ribosomal structure and biogenesis	Molecular Function: nucleic acid binding (GO:0003676);; Molecular Function: alanine-tRNA ligase activity (GO:0004813);; Molecular Function: ATP binding (GO:0005524);; Cellular Component: cytoplasm (GO:0005737);; Biological Process: alanyl-tRNA aminoacylation (GO:0006419);;	K01872|0|vvi:100249161|alanine--tRNA ligase; K01872 alanyl-tRNA synthetase [EC:6.1.1.7] (A)	[J]	Translation, ribosomal structure and biogenesis	tRNA synthetases class II (A)	Alanine--tRNA ligase {ECO:0000255|HAMAP-Rule:MF_03133} (Precursor) GN=F14I3.17 OS=Arabidopsis thaliana (Mouse-ear cress) PE=1 SV=3	J	Translation, ribosomal structure and biogenesis	PREDICTED: alanine--tRNA ligase-like [Vitis vinifera]
F01_c4439/f1p0/1664	--	--	Cellular Component: intracellular (GO:0005622);; Biological Process: signal transduction (GO:0007165);;	--	[T]	Signal transduction mechanisms	RhoGAP domain	Rho GTPase-activating protein 3 GN=ROPGAP3 OS=Arabidopsis thaliana (Mouse-ear cress) PE=2 SV=1	T	Signal transduction mechanisms	PREDICTED: rho GTPase-activating protein 5 [Vitis vinifera]
F01_c3670/f1p0/3603	--	--	--	--	[S]	Function unknown	Protein of unknown function (DUF1674)	--	S	Function unknown	hypothetical protein PHAVU_004G162900g [Phaseolus vulgaris]
F01_c14292/f1p1/2591	--	--	Molecular Function: prenyltransferase activity (GO:0004659);; Molecular Function: zinc ion binding (GO:0008270);; Cellular Component: chloroplast envelope (GO:0009941);; Biological Process: carotenoid biosynthetic process (GO:0016117);;	--	--	--	TRAF-type zinc finger	--	S	Function unknown	PREDICTED: uncharacterized protein LOC100246957 [Vitis vinifera]
F01_c6814/f1p6/3774	[C]	Energy production and conversion	Cellular Component: mitochondrion (GO:0005739);; Molecular Function: oxidoreductase activity, acting on NAD(P)H (GO:0016651);; Molecular Function: quinone binding (GO:0048038);; Molecular Function: NAD binding (GO:0051287);; Biological Process: oxidation-reduction process (GO:0055114);;	K03935|7.90158e-79|csv:101222212|NADH dehydrogenase [ubiquinone] iron-sulfur protein 2-like; K03935 NADH dehydrogenase (ubiquinone) Fe-S protein 2 [EC:1.6.5.3 1.6.99.3] (A)	[C]	Energy production and conversion	Respiratory-chain NADH dehydrogenase, 49 Kd subunit	NADH dehydrogenase [ubiquinone] iron-sulfur protein 2 GN=NAD7 OS=Nicotiana sylvestris (Wood tobacco) PE=2 SV=1	C	Energy production and conversion	hypothetical protein M569_00005, partial [Genlisea aurea]
F01_c5064/f1p0/2220	--	--	--	--	--	--	Protein of unknown function (DUF688)	--	S	Function unknown	conserved hypothetical protein [Ricinus communis]
F01_c7452/f1p0/1078	--	--	Biological Process: cellular process (GO:0009987);; Biological Process: protein maturation (GO:0051604);;	K08658|5.51218e-105|vvi:100247667|CAAX prenyl protease 2; K08658 prenyl protein peptidase [EC:3.4.22.-] (A)	[O]	Posttranslational modification, protein turnover, chaperones	CAAX protease self-immunity;; Protein of unknown function (DUF1029)	CAAX prenyl protease 2 GN=F2H17 OS=Arabidopsis thaliana (Mouse-ear cress) PE=2 SV=2	O	Posttranslational modification, protein turnover, chaperones	PREDICTED: CAAX prenyl protease 2 isoform X1 [Vitis vinifera]
F01_c12632/f1p0/1346	--	--	Cellular Component: plasma membrane (GO:0005886);; Biological Process: response to high light intensity (GO:0009644);; Molecular Function: magnesium ion transmembrane transporter activity (GO:0015095);; Biological Process: magnesium ion transport (GO:0015693);; Biological Process: response to hydrogen peroxide (GO:0042542);; Biological Process: transmembrane transport (GO:0055085);;	--	[P]	Inorganic ion transport and metabolism	--	Magnesium transporter MRS2-3 GN=MMB12.11 OS=Arabidopsis thaliana (Mouse-ear cress) PE=2 SV=1	P	Inorganic ion transport and metabolism	unnamed protein product [Vitis vinifera]
F01_c505/f1p0/984	[S]	Function unknown	Biological Process: phospholipid biosynthetic process (GO:0008654);; Biological Process: carboxylic acid metabolic process (GO:0019752);; Biological Process: single-organism process (GO:0044699);;	--	--	--	Oligomerisation domain	Protein Iojap, chloroplastic (Precursor) GN=IJ OS=Arabidopsis thaliana (Mouse-ear cress) PE=2 SV=1	S	Function unknown	PREDICTED: protein Iojap, chloroplastic [Vitis vinifera]
F01_c5286/f1p16/3129	--	--	Cellular Component: endosome (GO:0005768);; Cellular Component: trans-Golgi network (GO:0005802);; Molecular Function: methyltransferase activity (GO:0008168);; Biological Process: response to cytokinin (GO:0009735);; Biological Process: homogalacturonan biosynthetic process (GO:0010289);; Biological Process: methylation (GO:0032259);; Biological Process: root development (GO:0048364);; Biologica…	--	--	--	Putative S-adenosyl-L-methionine-dependent methyltransferase;; Methyltransferase domain;; Methyltransferase domain;; Methyltransferase domain	Probable pectin methyltransferase QUA2 OS=Arabidopsis thaliana (Mouse-ear cress) PE=1 SV=2	R	General function prediction only	PREDICTED: probable pectin methyltransferase QUA2 [Vitis vinifera]
F01_c2133/f5p4/2251	--	--	Cellular Component: integral component of membrane (GO:0016021);; Biological Process: transmembrane transport (GO:0055085);;	--	[P]	Inorganic ion transport and metabolism	Citrate transporter;; Arsenical pump membrane protein;; Sodium:sulfate symporter transmembrane region;; Bacterial Na+/H+ antiporter B (NhaB)	--	P	Inorganic ion transport and metabolism	Divalent ion symporter isoform 1 [Theobroma cacao]
F01_c12938/f1p0/1152	[J]	Translation, ribosomal structure and biogenesis	Molecular Function: structural constituent of ribosome (GO:0003735);; Cellular Component: ribosome (GO:0005840);; Biological Process: translation (GO:0006412);; Cellular Component: chloroplast stroma (GO:0009570);; Cellular Component: thylakoid (GO:0009579);; Cellular Component: chloroplast envelope (GO:0009941);;	K02899|8.72283e-80|vvi:100260093|50S ribosomal protein L27, chloroplastic; K02899 large subunit ribosomal protein L27 (A)	[J]	Translation, ribosomal structure and biogenesis	Ribosomal L27 protein	50S ribosomal protein L27, chloroplastic (Precursor) GN=RPL27 OS=Arabidopsis thaliana (Mouse-ear cress) PE=2 SV=1	J	Translation, ribosomal structure and biogenesis	PREDICTED: 50S ribosomal protein L27, chloroplastic [Vitis vinifera]
F01_c12266/f2p19/2054	[I]	Lipid transport and metabolism	Molecular Function: acyl-CoA dehydrogenase activity (GO:0003995);; Molecular Function: acyl-CoA oxidase activity (GO:0003997);; Cellular Component: peroxisome (GO:0005777);; Biological Process: fatty acid beta-oxidation (GO:0006635);; Molecular Function: flavin adenine dinucleotide binding (GO:0050660);;	K00232|0|cic:CICLE_v10019196mg|hypothetical protein; K00232 acyl-CoA oxidase [EC:1.3.3.6] (A)	[I]	Lipid transport and metabolism	Acyl-CoA oxidase;; Acyl-coenzyme A oxidase N-terminal;; Acyl-CoA dehydrogenase, middle domain;; Acyl-CoA dehydrogenase, C-terminal domain	Peroxisomal acyl-coenzyme A oxidase 1 GN=ACX1 OS=Arabidopsis thaliana (Mouse-ear cress) PE=1 SV=1	I	Lipid transport and metabolism	hypothetical protein CICLE_v10019196mg [Citrus clementina]
F01_c16395/f1p5/3941	[M]	Cell wall/membrane/envelope biogenesis	Cellular Component: Golgi apparatus (GO:0005794);; Molecular Function: zinc ion binding (GO:0008270);; Biological Process: plant-type primary cell wall biogenesis (GO:0009833);; Biological Process: seed coat development (GO:0010214);; Cellular Component: integral component of membrane (GO:0016021);; Biological Process: cell growth (GO:0016049);; Molecular Function: cellulose synthase (UDP-forming…	K10999|0|pper:PRUPE_ppa000559mg|hypothetical protein; K10999 cellulose synthase A [EC:2.4.1.12] (A)	--	--	Cellulose synthase;; Zinc-binding RING-finger;; Glycosyltransferase like family 2;; Glycosyl transferase family group 2	Cellulose synthase A catalytic subunit 6 [UDP-forming] GN=MVP7.7 OS=Arabidopsis thaliana (Mouse-ear cress) PE=1 SV=2	O	Posttranslational modification, protein turnover, chaperones	hypothetical protein PRUPE_ppa000559mg [Prunus persica]
F01_c13118/f1p8/1369	--	--	Biological Process: fatty acid biosynthetic process (GO:0006633);; Cellular Component: membrane (GO:0016020);; Molecular Function: transferase activity, transferring acyl groups other than amino-acyl groups (GO:0016747);;	K15397|0|vvi:100853861|3-ketoacyl-CoA synthase 4; K15397 3-ketoacyl-CoA synthase [EC:2.3.1.199] (A)	--	--	FAE1/Type III polyketide synthase-like protein;; 3-Oxoacyl-[acyl-carrier-protein (ACP)] synthase III C terminal;; Chalcone and stilbene synthases, C-terminal domain;; Chalcone and stilbene synthases, N-terminal domain;; 3-Oxoacyl-[acyl-carrier-protein (ACP)] synthase III	3-ketoacyl-CoA synthase 4 GN=KCS4 OS=Arabidopsis thaliana (Mouse-ear cress) PE=2 SV=1	I	Lipid transport and metabolism	PREDICTED: 3-ketoacyl-CoA synthase 4 [Vitis vinifera]
F01_c14403/f1p3/1094	--	--	--	--	--	--	Domain of unknown function (DUF1338)	--	S	Function unknown	unnamed protein product [Vitis vinifera]
F01_c10692/f1p15/1552	[U]	Intracellular trafficking, secretion, and vesicular transport	Biological Process: intracellular protein transport (GO:0006886);; Biological Process: ER to Golgi vesicle-mediated transport (GO:0006888);; Molecular Function: zinc ion binding (GO:0008270);; Cellular Component: COPII vesicle coat (GO:0030127);;	K14007|0|vvi:100265768|protein transport protein Sec24-like At4g32640; K14007 protein transport protein SEC24 (A)	[U]	Intracellular trafficking, secretion, and vesicular transport	Sec23/Sec24 helical domain;; Sec23/Sec24 beta-sandwich domain;; Sec23/Sec24 trunk domain;; Gelsolin repeat	Protein transport protein Sec24-like CEF GN=CEF OS=Arabidopsis thaliana (Mouse-ear cress) PE=2 SV=3	U	Intracellular trafficking, secretion, and vesicular transport	PREDICTED: protein transport protein Sec24-like At4g32640 [Vitis vinifera]
F01_c15488/f1p3/1538	--	--	Molecular Function: nucleotide binding (GO:0000166);; Molecular Function: nucleic acid binding (GO:0003676);;	K13201|3.68753e-88|pper:PRUPE_ppa006419mg|hypothetical protein; K13201 nucleolysin TIA-1/TIAR (A)	[R]	General function prediction only	RNA recognition motif. (a.k.a. RRM, RBD, or RNP domain);; RNA recognition motif. (a.k.a. RRM, RBD, or RNP domain)	Oligouridylate-binding protein 1B GN=UBP1B OS=Arabidopsis thaliana (Mouse-ear cress) PE=1 SV=1	R	General function prediction only	hypothetical protein PRUPE_ppa006419mg [Prunus persica]
F01_c2603/f1p1/3255	[C]	Energy production and conversion	Biological Process: response to reactive oxygen species (GO:0000302);; Molecular Function: copper ion binding (GO:0005507);; Cellular Component: mitochondrion (GO:0005739);; Cellular Component: vacuole (GO:0005773);; Cellular Component: cytosol (GO:0005829);; Cellular Component: plasma membrane (GO:0005886);; Biological Process: glycolytic process (GO:0006096);; Biological Process: citrate metabo…	K01681|0|pop:POPTR_0007s09260g|hypothetical protein; K01681 aconitate hydratase [EC:4.2.1.3] (A)	[AJ]	--	Aconitase family (aconitate hydratase)	Aconitate hydratase 1 GN=F4B14.100 OS=Arabidopsis thaliana (Mouse-ear cress) PE=1 SV=2	C	Energy production and conversion	hypothetical protein POPTR_0007s09260g [Populus trichocarpa]
F01_c296/f2p6/928	--	--	Molecular Function: RNA binding (GO:0003723);; Molecular Function: polynucleotide adenylyltransferase activity (GO:0004652);; Cellular Component: nucleus (GO:0005634);; Cellular Component: cytoplasm (GO:0005737);; Biological Process: transcription, DNA-templated (GO:0006351);; Biological Process: mRNA processing (GO:0006397);; Biological Process: RNA polyadenylation (GO:0043631);;	K14376|3.23022e-90|cic:CICLE_v10004938mg|hypothetical protein; K14376 poly(A) polymerase [EC:2.7.7.19] (A)	[A]	RNA processing and modification	Poly(A) polymerase predicted RNA binding domain	Nuclear poly(A) polymerase 3 {ECO:0000303|PubMed:18479511} OS=Arabidopsis thaliana (Mouse-ear cress) PE=1 SV=1	A	RNA processing and modification	hypothetical protein CICLE_v10004938mg [Citrus clementina]
F01_c15128/f1p0/1198	--	--	Molecular Function: polygalacturonase activity (GO:0004650);; Cellular Component: extracellular region (GO:0005576);; Biological Process: carbohydrate metabolic process (GO:0005975);; Molecular Function: galacturan 1,4-alpha-galacturonidase activity (GO:0047911);;	K01184|5.17267e-97|cit:102617652|polygalacturonase-like; K01184 polygalacturonase [EC:3.2.1.15] (A)	--	--	Glycosyl hydrolases family 28	Probable polygalacturonase At2g43860 (Precursor) GN=At2g43860 OS=Arabidopsis thaliana (Mouse-ear cress) PE=2 SV=1	R	General function prediction only	PREDICTED: polygalacturonase-like [Citrus sinensis]
F01_c2973/f4p18/2372	[RTKL]	--	Molecular Function: protein kinase activity (GO:0004672);; Molecular Function: ATP binding (GO:0005524);; Biological Process: protein phosphorylation (GO:0006468);; Cellular Component: integral component of membrane (GO:0016021);;	--	[T]	Signal transduction mechanisms	Protein tyrosine kinase;; Protein kinase domain;; Leucine rich repeat N-terminal domain	Inactive receptor-like serine/threonine-protein kinase At2g40270 (Precursor) GN=At2g40270 OS=Arabidopsis thaliana (Mouse-ear cress) PE=2 SV=2	T	Signal transduction mechanisms	hypothetical protein PRUPE_ppa002525mg [Prunus persica]
F01_c5824/f1p2/2029	--	--	--	--	--	--	--	--	S	Function unknown	PREDICTED: centromere-associated protein E-like [Prunus mume]
F01_c11692/f1p1/3947	[R]	General function prediction only	--	--	[A]	RNA processing and modification	DEAD/DEAH box helicase	ATP-dependent DNA helicase Q-like 5 GN=F28L5.4 OS=Arabidopsis thaliana (Mouse-ear cress) PE=2 SV=2	A	RNA processing and modification	PREDICTED: putative ATP-dependent helicase HRQ1 isoform X3 [Vitis vinifera]
F01_c15098/f1p4/2064	[R]	General function prediction only	Molecular Function: nucleotide binding (GO:0000166);; Molecular Function: RNA binding (GO:0003723);; Biological Process: response to salt stress (GO:0009651);; Biological Process: response to cadmium ion (GO:0046686);;	K13126|0|gmx:100813735|polyadenylate-binding protein 8-like; K13126 polyadenylate-binding protein (A)	[AJ]	--	RNA recognition motif. (a.k.a. RRM, RBD, or RNP domain);; RNA recognition motif (a.k.a. RRM, RBD, or RNP domain);; RNA recognition motif. (a.k.a. RRM, RBD, or RNP domain);; Poly-adenylate binding protein, unique domain;; RNA binding motif;; Limkain b1	Polyadenylate-binding protein 8 GN=PAB8 OS=Arabidopsis thaliana (Mouse-ear cress) PE=1 SV=1	A	RNA processing and modification	PREDICTED: polyadenylate-binding protein 8-like [Glycine max]
F01_c14008/f2p6/3230	--	--	--	--	--	--	--	--	S	Function unknown	hypothetical protein MTR_5g050970 [Medicago truncatula]
F01_c7377/f1p3/1475	--	--	--	--	--	--	Agenet domain	--	R	General function prediction only	PREDICTED: uncharacterized protein LOC100265203 [Vitis vinifera]
F01_c4694/f1p2/2507	[A]	RNA processing and modification	Molecular Function: mRNA guanylyltransferase activity (GO:0004484);; Molecular Function: polynucleotide 5'-phosphatase activity (GO:0004651);; Molecular Function: protein tyrosine phosphatase activity (GO:0004725);; Biological Process: 7-methylguanosine mRNA capping (GO:0006370);; Molecular Function: protein tyrosine/serine/threonine phosphatase activity (GO:0008138);; Biological Process: peptidy…	K13917|0|mdm:103413385|mRNA-capping enzyme-like; K13917 mRNA-capping enzyme [EC:2.7.7.50 3.6.1.-] (A)	[A]	RNA processing and modification	mRNA capping enzyme, catalytic domain;; mRNA capping enzyme, C-terminal domain	--	A	RNA processing and modification	PREDICTED: mRNA-capping enzyme-like isoform X5 [Solanum lycopersicum]
F01_c3565/f2p1/4096	--	--	--	--	[TU]	--	EF-hand domain pair;; EF hand;; EF hand;; Cytoskeletal-regulatory complex EF hand	--	667	EF hand family protein	PREDICTED: epidermal growth factor receptor substrate 15-like [Nelumbo nucifera]
F01_c14229/f1p4/2092	--	--	Biological Process: metabolic process (GO:0008152);; Cellular Component: membrane (GO:0016020);; Molecular Function: hydrolase activity, acting on ester bonds (GO:0016788);; Cellular Component: cell periphery (GO:0071944);;	--	--	--	Pectinesterase	Pectinesterase 3 (Precursor) GN=MPE3 OS=Phaseolus vulgaris (Kidney bean) PE=2 SV=1	R	General function prediction only	Pectinesterase 3 [Theobroma cacao]
F01_c3469/f1p2/2201	--	--	--	--	--	--	Putative S-adenosyl-L-methionine-dependent methyltransferase	Probable methyltransferase PMT21 GN=ERD3 OS=Arabidopsis thaliana (Mouse-ear cress) PE=2 SV=1	R	General function prediction only	PREDICTED: probable methyltransferase PMT20-like [Fragaria vesca subsp. vesca]
F01_c6149/f2p2/3119	[E]	Amino acid transport and metabolism	--	K12524|0|cit:102628536|bifunctional aspartokinase/homoserine dehydrogenase 1, chloroplastic-like; K12524 bifunctional aspartokinase / homoserine dehydrogenase 1 [EC:2.7.2.4 1.1.1.3] (A)	--	--	Homoserine dehydrogenase	Homoserine dehydrogenase (Precursor; Fragment) OS=Daucus carota (Wild carrot) PE=1 SV=1	E	Amino acid transport and metabolism	PREDICTED: bifunctional aspartokinase/homoserine dehydrogenase 1, chloroplastic-like [Citrus sinensis]
F01_c16925/f1p3/3659	--	--	--	--	--	--	--	Protein SCAR3 GN=SCAR3 OS=Arabidopsis thaliana (Mouse-ear cress) PE=1 SV=1	S	Function unknown	PREDICTED: protein SCAR3 isoform X3 [Vitis vinifera]
F01_c17673/f1p23/1293	[I]	Lipid transport and metabolism	Molecular Function: phospholipase D activity (GO:0004630);; Molecular Function: calcium ion binding (GO:0005509);; Molecular Function: phosphatidylinositol-4,5-bisphosphate binding (GO:0005546);; Cellular Component: nucleus (GO:0005634);; Cellular Component: mitochondrion (GO:0005739);; Cellular Component: vacuole (GO:0005773);; Cellular Component: endoplasmic reticulum (GO:0005783);; Cellular Co…	K01115|0|rcu:RCOM_0899520|phopholipase d alpha, putative (EC:3.1.4.4); K01115 phospholipase D1/2 [EC:3.1.4.4] (A)	[I]	Lipid transport and metabolism	Phospholipase D C terminal;; Phospholipase D Active site motif;; PLD-like domain	Phospholipase D alpha 1 (Precursor) GN=PLD1 OS=Ricinus communis (Castor bean) PE=1 SV=1	I	Lipid transport and metabolism	phopholipase d alpha, putative [Ricinus communis]
F01_c8606/f3p1/2399	--	--	--	--	--	--	FBD	F-box/LRR-repeat protein 25 GN=FBL25 OS=Arabidopsis thaliana (Mouse-ear cress) PE=2 SV=1	R	General function prediction only	PREDICTED: putative F-box protein At1g49610 [Nelumbo nucifera]
F01_c16626/f1p0/4107	--	--	--	--	--	--	Protein of unknown function (DUF3730)	Protein RST1 GN=RST1 OS=Arabidopsis thaliana (Mouse-ear cress) PE=2 SV=2	S	Function unknown	PREDICTED: protein RST1 [Vitis vinifera]
F01_c769/f21p14/1319	--	--	Cellular Component: cell wall (GO:0005618);; Cellular Component: plasma membrane (GO:0005886);; Biological Process: defense response (GO:0006952);; Biological Process: signal transduction (GO:0007165);; Cellular Component: plasmodesma (GO:0009506);; Cellular Component: chloroplast (GO:0009507);; Cellular Component: apoplast (GO:0048046);;	--	[R]	General function prediction only	Leucine rich repeat N-terminal domain;; Leucine Rich repeats (2 copies);; Leucine Rich Repeat	DNA-damage-repair/toleration protein DRT100 (Precursor) OS=Arabidopsis thaliana (Mouse-ear cress) PE=2 SV=2	R	General function prediction only	PREDICTED: DNA-damage-repair/toleration protein DRT100 [Prunus mume]
F01_c15562/f1p1/3152	--	--	--	--	[T]	Signal transduction mechanisms	HEAT repeat	--	T	Signal transduction mechanisms	PREDICTED: lisH domain and HEAT repeat-containing protein KIAA1468 homolog [Vitis vinifera]
F01_c18667/f1p11/1676	[G]	Carbohydrate transport and metabolism	Molecular Function: transketolase activity (GO:0004802);; Biological Process: metabolic process (GO:0008152);;	K00615|0|rcu:RCOM_1611360|transketolase, putative (EC:2.2.1.1); K00615 transketolase [EC:2.2.1.1] (A)	[G]	Carbohydrate transport and metabolism	Transketolase, pyrimidine binding domain;; Transketolase, thiamine diphosphate binding domain;; Transketolase, C-terminal domain	Transketolase, chloroplastic (Fragment) GN=TKT3 OS=Craterostigma plantagineum (Blue gem) PE=1 SV=1	G	Carbohydrate transport and metabolism	hypothetical protein JCGZ_14540 [Jatropha curcas]
F01_c17245/f4p8/2098	[GEPR]	--	Molecular Function: inorganic phosphate transmembrane transporter activity (GO:0005315);; Biological Process: pentose-phosphate shunt (GO:0006098);; Molecular Function: organic anion transmembrane transporter activity (GO:0008514);; Cellular Component: chloroplast inner membrane (GO:0009706);; Biological Process: organic anion transport (GO:0015711);; Cellular Component: integral component of mem…	--	[G]	Carbohydrate transport and metabolism	Major Facilitator Superfamily	Probable anion transporter 2, chloroplastic (Precursor) OS=Arabidopsis thaliana (Mouse-ear cress) PE=2 SV=1	G	Carbohydrate transport and metabolism	PREDICTED: probable anion transporter 2, chloroplastic [Vitis vinifera]
F01_c14312/f1p0/3228	--	--	--	--	[S]	Function unknown	--	--	S	Function unknown	PREDICTED: HEAT repeat-containing protein 5B-like isoform X1 [Pyrus x bretschneideri]
F01_c1977/f9p6/3458	[O]	Posttranslational modification, protein turnover, chaperones	Molecular Function: serine-type endopeptidase activity (GO:0004252);; Cellular Component: endoplasmic reticulum (GO:0005783);; Cellular Component: Golgi apparatus (GO:0005794);; Biological Process: protein glycosylation (GO:0006486);; Biological Process: proteolysis (GO:0006508);; Biological Process: ER to Golgi vesicle-mediated transport (GO:0006888);; Biological Process: hyperosmotic salinity r…	K08653|0|tcc:TCM_037871|Site-1 protease, putative isoform 1; K08653 membrane-bound transcription factor site-1 protease [EC:3.4.21.112] (A)	[O]	Posttranslational modification, protein turnover, chaperones	Subtilase family	CO(2)-response secreted protease {ECO:0000303|PubMed:25043023} (Precursor) OS=Arabidopsis thaliana (Mouse-ear cress) PE=2 SV=1	O	Posttranslational modification, protein turnover, chaperones	Site-1 protease, putative isoform 2 [Theobroma cacao]
F01_c860/f1p7/928	[O]	Posttranslational modification, protein turnover, chaperones	Molecular Function: ATP binding (GO:0005524);; Biological Process: protein folding (GO:0006457);; Biological Process: response to stress (GO:0006950);; Molecular Function: 2-alkenal reductase [NAD(P)] activity (GO:0032440);; Molecular Function: unfolded protein binding (GO:0051082);; Biological Process: oxidation-reduction process (GO:0055114);;	--	[O]	Posttranslational modification, protein turnover, chaperones	Hsp70 protein	Stromal 70 kDa heat shock-related protein, chloroplastic (Precursor) GN=HSP70 OS=Pisum sativum (Garden pea) PE=2 SV=1	O	Posttranslational modification, protein turnover, chaperones	unknown [Populus trichocarpa x Populus deltoides]
F01_c15374/f1p1/1051	[J]	Translation, ribosomal structure and biogenesis	Molecular Function: RNA binding (GO:0003723);; Molecular Function: structural constituent of ribosome (GO:0003735);; Cellular Component: nucleus (GO:0005634);; Biological Process: pentose-phosphate shunt (GO:0006098);; Biological Process: DNA-templated transcription, elongation (GO:0006354);; Biological Process: translation (GO:0006412);; Biological Process: aromatic amino acid family biosyntheti…	K02863|3.44233e-160|vvi:100244868|50S ribosomal protein L1, chloroplastic; K02863 large subunit ribosomal protein L1 (A)	[J]	Translation, ribosomal structure and biogenesis	Ribosomal protein L1p/L10e family	50S ribosomal protein L1, chloroplastic (Precursor) GN=RPL1 OS=Arabidopsis thaliana (Mouse-ear cress) PE=1 SV=1	J	Translation, ribosomal structure and biogenesis	unnamed protein product [Vitis vinifera]
F01_c13891/f1p0/2045	[R]	General function prediction only	Molecular Function: acid phosphatase activity (GO:0003993);; Molecular Function: protein serine/threonine phosphatase activity (GO:0004722);; Biological Process: tryptophan catabolic process (GO:0006569);; Biological Process: systemic acquired resistance (GO:0009627);; Biological Process: indoleacetic acid biosynthetic process (GO:0009684);; Biological Process: regulation of defense response (GO:…	--	[G]	Carbohydrate transport and metabolism	Iron/zinc purple acid phosphatase-like protein C;; Calcineurin-like phosphoesterase;; Calcineurin-like phosphoesterase superfamily domain	Probable inactive purple acid phosphatase 1 (Precursor) GN=PAP1 OS=Arabidopsis thaliana (Mouse-ear cress) PE=2 SV=1	G	Carbohydrate transport and metabolism	unnamed protein product [Vitis vinifera]
F01_c10096/f1p11/2275	[RTKL]	--	Molecular Function: calmodulin-dependent protein kinase activity (GO:0004683);; Molecular Function: calcium ion binding (GO:0005509);; Molecular Function: ATP binding (GO:0005524);; Biological Process: protein phosphorylation (GO:0006468);;	K13412|0|vvi:100248850|calcium-dependent protein kinase 28; K13412 calcium-dependent protein kinase [EC:2.7.11.1] (A)	[T]	Signal transduction mechanisms	Protein kinase domain;; Protein tyrosine kinase;; EF hand;; EF-hand domain pair;; EF hand;; EF-hand domain;; EF-hand domain pair;; Kinase-like;; Secreted protein acidic and rich in cysteine Ca binding region;; Phosphotransferase enzyme family	Calcium-dependent protein kinase 28 GN=CPK28 OS=Arabidopsis thaliana (Mouse-ear cress) PE=1 SV=1	T	Signal transduction mechanisms	hypothetical protein CICLE_v10025251mg [Citrus clementina]
F01_c15623/f1p1/2918	[E]	Amino acid transport and metabolism	Molecular Function: nucleotide binding (GO:0000166);; Molecular Function: glutamate dehydrogenase (NADP+) activity (GO:0004354);; Biological Process: cellular amino acid metabolic process (GO:0006520);; Biological Process: spermidine biosynthetic process (GO:0008295);; Biological Process: glucuronoxylan metabolic process (GO:0010413);; Biological Process: xylan biosynthetic process (GO:0045492);;…	K00262|0|vvi:100244689|NADP-specific glutamate dehydrogenase; K00262 glutamate dehydrogenase (NADP+) [EC:1.4.1.4] (A)	[E]	Amino acid transport and metabolism	Glu/Leu/Phe/Val dehydrogenase, dimerisation domain	NADP-specific glutamate dehydrogenase (Fragment) OS=Chlorella sorokiniana PE=2 SV=1	E	Amino acid transport and metabolism	PREDICTED: NADP-specific glutamate dehydrogenase [Vitis vinifera]
F01_c5565/f1p0/2709	--	--	Biological Process: ribosomal large subunit export from nucleus (GO:0000055);; Biological Process: actin cytoskeleton organization (GO:0030036);; Biological Process: ribosomal large subunit biogenesis (GO:0042273);;	K14856|0|vvi:100252440|protein SDA1 homolog; K14856 protein SDA1 (A)	[DZ]	--	SDA1;; NUC130/3NT domain	--	2072	Protein SDA1 homolog	PREDICTED: protein SDA1 homolog isoform X3 [Vitis vinifera]
F01_c12255/f2p7/3677	[RTKL]	--	Molecular Function: protein kinase activity (GO:0004672);; Biological Process: cellular protein modification process (GO:0006464);; Biological Process: phosphorylation (GO:0016310);;	--	[T]	Signal transduction mechanisms	PB1 domain	Serine/threonine-protein kinase EDR1 GN=F22O13.20 OS=Arabidopsis thaliana (Mouse-ear cress) PE=1 SV=1	T	Signal transduction mechanisms	PREDICTED: uncharacterized protein LOC104599652 [Nelumbo nucifera]
F01_c15605/f1p1/2184	--	--	--	--	[R]	General function prediction only	GPCR-chaperone;; Ankyrin repeats (3 copies)	--	R	General function prediction only	hypothetical protein VITISV_015320 [Vitis vinifera]
F01_c5796/f2p2/1281	--	--	Molecular Function: iron ion binding (GO:0005506);; Cellular Component: mitochondrial respiratory chain complex III (GO:0005750);; Cellular Component: vacuole (GO:0005773);; Cellular Component: plasma membrane (GO:0005886);; Biological Process: mitochondrial electron transport, ubiquinol to cytochrome c (GO:0006122);; Cellular Component: plastid (GO:0009536);; Molecular Function: heme binding (GO…	K00413|0|cic:CICLE_v10023388mg|hypothetical protein; K00413 ubiquinol-cytochrome c reductase cytochrome c1 subunit (A)	[C]	Energy production and conversion	Cytochrome C1 family	Cytochrome c1 2, heme protein, mitochondrial (Precursor) GN=CYC12 OS=Arabidopsis thaliana (Mouse-ear cress) PE=1 SV=1	C	Energy production and conversion	PREDICTED: cytochrome c1-2, heme protein, mitochondrial isoform X1 [Vitis vinifera]
F01_c7853/f1p0/3331	--	--	--	--	--	--	--	--	L	Replication, recombination and repair	PREDICTED: uncharacterized protein LOC104602430 [Nelumbo nucifera]
F01_c7961/f1p1/2089	[R]	General function prediction only	Molecular Function: magnesium ion binding (GO:0000287);; Molecular Function: GTPase activity (GO:0003924);; Molecular Function: GTP binding (GO:0005525);; Biological Process: GTP catabolic process (GO:0006184);; Biological Process: rRNA processing (GO:0006364);; Cellular Component: chloroplast stroma (GO:0009570);; Biological Process: chloroplast organization (GO:0009658);; Cellular Component: ch…	--	[R]	General function prediction only	GTP1/OBG	GTP-binding protein OBGC, chloroplastic (Precursor) GN=T28N17.50 OS=Arabidopsis thaliana (Mouse-ear cress) PE=2 SV=1	R	General function prediction only	PREDICTED: LOW QUALITY PROTEIN: GTP-binding protein OBGC, chloroplastic [Malus domestica]
F01_c7181/f1p0/3751	--	--	Molecular Function: nucleic acid binding (GO:0003676);;	--	[L]	Replication, recombination and repair	hAT family C-terminal dimerisation region	Zinc finger BED domain-containing protein RICESLEEPER 2 OS=Oryza sativa subsp. japonica (Rice) PE=2 SV=1	L	Replication, recombination and repair	hypothetical protein PRUPE_ppa021175mg, partial [Prunus persica]
F01_c7115/f1p1/1204	--	--	--	--	--	--	HAD superfamily, subfamily IIIB (Acid phosphatase)	Uncharacterized protein At2g39920 GN=At2g39920 OS=Arabidopsis thaliana (Mouse-ear cress) PE=2 SV=2	R	General function prediction only	hypothetical protein POPTR_0010s20080g [Populus trichocarpa]
F01_c297/f2p35/903	[G]	Carbohydrate transport and metabolism	Molecular Function: glyceraldehyde-3-phosphate dehydrogenase (NAD+) (phosphorylating) activity (GO:0004365);; Cellular Component: cytoplasm (GO:0005737);; Biological Process: glycolytic process (GO:0006096);; Molecular Function: NADP binding (GO:0050661);; Molecular Function: NAD binding (GO:0051287);; Biological Process: oxidation-reduction process (GO:0055114);;	K00134|8.96347e-155|rcu:RCOM_1507100|glyceraldehyde 3-phosphate dehydrogenase, putative (EC:1.2.1.12); K00134 glyceraldehyde 3-phosphate dehydrogenase [EC:1.2.1.12] (A)	[G]	Carbohydrate transport and metabolism	Glyceraldehyde 3-phosphate dehydrogenase, C-terminal domain;; Glyceraldehyde 3-phosphate dehydrogenase, NAD binding domain	Glyceraldehyde-3-phosphate dehydrogenase, cytosolic GN=GAPC OS=Antirrhinum majus (Garden snapdragon) PE=2 SV=1	G	Carbohydrate transport and metabolism	glyceraldehyde 3-phosphate dehydrogenase, putative [Ricinus communis]
F01_c5562/f1p1/2099	--	--	Biological Process: ion transport (GO:0006811);; Cellular Component: macromolecular complex (GO:0032991);; Cellular Component: intracellular organelle (GO:0043229);; Biological Process: primary metabolic process (GO:0044238);; Biological Process: cellular biosynthetic process (GO:0044249);; Cellular Component: cytoplasmic part (GO:0044444);; Biological Process: single-organism metabolic process (…	K02946|9.16011e-50|mtr:MTR_1g006120|Ribosomal protein S10; K02946 small subunit ribosomal protein S10 (A)	--	--	--	--	S	Function unknown	Ribosomal protein S10 [Medicago truncatula]
F01_c1224/f1p1/919	[O]	Posttranslational modification, protein turnover, chaperones	Molecular Function: lactoylglutathione lyase activity (GO:0004462);; Molecular Function: transferase activity (GO:0016740);;	K00799|4.65083e-63|vvi:100264557|probable glutathione S-transferase; K00799 glutathione S-transferase [EC:2.5.1.18] (A)	[O]	Posttranslational modification, protein turnover, chaperones	Glutathione S-transferase, C-terminal domain	Probable glutathione S-transferase parC GN=PARC OS=Nicotiana tabacum (Common tobacco) PE=2 SV=1	O	Posttranslational modification, protein turnover, chaperones	PREDICTED: glutathione S-transferase U25-like [Eucalyptus grandis]
F01_c9877/f1p0/2147	[O]	Posttranslational modification, protein turnover, chaperones	Molecular Function: ATP binding (GO:0005524);; Biological Process: protein folding (GO:0006457);; Biological Process: response to stress (GO:0006950);; Molecular Function: unfolded protein binding (GO:0051082);;	K09487|3.74807e-41|rcu:RCOM_0483320|heat shock protein, putative; K09487 heat shock protein 90kDa beta (A)	[O]	Posttranslational modification, protein turnover, chaperones	--	Vacuolar protein sorting-associated protein 53 A OS=Arabidopsis thaliana (Mouse-ear cress) PE=1 SV=1	O	Posttranslational modification, protein turnover, chaperones	Endoplasmin [Gossypium arboreum]
F01_c15117/f1p1/1055	[OC]	--	Biological Process: glycerol ether metabolic process (GO:0006662);; Molecular Function: electron carrier activity (GO:0009055);; Cellular Component: chloroplast stroma (GO:0009570);; Molecular Function: protein disulfide oxidoreductase activity (GO:0015035);; Molecular Function: oxidoreductase activity, acting on a sulfur group of donors, disulfide as acceptor (GO:0016671);; Cellular Component: c…	--	[O]	Posttranslational modification, protein turnover, chaperones	Thioredoxin	Thioredoxin-like 2, chloroplastic (Precursor) GN=OSJNBa0017O06.11 OS=Oryza sativa subsp. japonica (Rice) PE=2 SV=1	O	Posttranslational modification, protein turnover, chaperones	PREDICTED: thioredoxin-like 2, chloroplastic [Vitis vinifera]
F01_c2986/f4p3/2323	--	--	Cellular Component: chloroplast thylakoid membrane (GO:0009535);; Cellular Component: photosystem II reaction center (GO:0009539);; Biological Process: photosynthesis (GO:0015979);; Cellular Component: integral component of membrane (GO:0016021);;	K02710|5.43671e-19|pda:8890483|psbI, PhdaC_p005; photosystem II protein I; K02710 photosystem II PsbI protein (A)	--	--	Photosystem II 4 kDa reaction centre component	Photosystem II reaction center protein K {ECO:0000255|HAMAP-Rule:MF_00441} (Precursor) OS=Vitis vinifera (Grape) PE=3 SV=1	S	Function unknown	photosystem II protein I [Prinsepia utilis]
F01_c19448/f2p7/1340	--	--	Molecular Function: nucleotide binding (GO:0000166);; Cellular Component: cytosol (GO:0005829);; Biological Process: steroid metabolic process (GO:0008202);; Biological Process: xylem and phloem pattern formation (GO:0010051);; Molecular Function: enone reductase activity (GO:0035671);;	--	--	--	NADH(P)-binding;; NAD dependent epimerase/dehydratase family	3-oxo-Delta(4,5)-steroid 5-beta-reductase GN=T22A6.50 OS=Arabidopsis thaliana (Mouse-ear cress) PE=1 SV=1	R	General function prediction only	hypothetical protein JCGZ_16056 [Jatropha curcas]
F01_c13176/f1p13/2789	--	--	Molecular Function: ATP binding (GO:0005524);; Cellular Component: chloroplast stroma (GO:0009570);; Molecular Function: nucleoside-triphosphatase activity (GO:0017111);;	--	--	--	Chloroplast protein precursor Ycf15 putative	Protein Ycf2 {ECO:0000255|HAMAP-Rule:MF_01330} OS=Vitis vinifera (Grape) PE=3 SV=1	O	Posttranslational modification, protein turnover, chaperones	Ycf2 (chloroplast) [Paeonia sp. Sd0052]
F01_c11767/f1p4/2324	[M]	Cell wall/membrane/envelope biogenesis	Molecular Function: cellulose synthase (UDP-forming) activity (GO:0016760);;	--	--	--	Glycosyltransferase like family 2;; Glycosyl transferase family group 2;; Glycosyl transferase family 21;; Glycosyl transferase family 2;; Chitin synthase	Probable xyloglucan glycosyltransferase 12 GN=CSLC12 OS=Arabidopsis thaliana (Mouse-ear cress) PE=1 SV=1	R	General function prediction only	Cellulose-synthase-like C12 [Theobroma cacao]
F01_c5914/f1p0/1609	--	--	Biological Process: metabolic process (GO:0008152);; Molecular Function: oxidoreductase activity, acting on paired donors, with incorporation or reduction of molecular oxygen, NAD(P)H as one donor, and incorporation of one atom of oxygen (GO:0016709);;	--	[CR]	--	FAD binding domain	Zeaxanthin epoxidase, chloroplastic (Precursor) GN=ZEP OS=Oncidium hybrid cultivar (Orchid) PE=2 SV=1	C	Energy production and conversion	monoxygenase, putative [Ricinus communis]
F01_c13048/f1p3/2612	--	--	Molecular Function: catalytic activity (GO:0003824);; Biological Process: metabolic process (GO:0008152);; Cellular Component: chloroplast (GO:0009507);; Molecular Function: metal ion binding (GO:0046872);;	--	--	--	Protein of unknown function (DUF2647)	Uncharacterized protein ycf68 GN=ycf68-2 OS=Eucalyptus globulus subsp. globulus (Tasmanian blue gum) PE=3 SV=1	S	Function unknown	Ycf68 [Medicago truncatula]
F01_c13442/f1p6/1587	--	--	Molecular Function: sequence-specific DNA binding transcription factor activity (GO:0003700);; Cellular Component: nucleus (GO:0005634);; Biological Process: regulation of transcription, DNA-templated (GO:0006355);; Molecular Function: sequence-specific DNA binding (GO:0043565);;	--	[K]	Transcription	Homeobox KN domain;; Associated with HOX;; Homeobox domain	BEL1-like homeodomain protein 1 GN=F11F19.15 OS=Arabidopsis thaliana (Mouse-ear cress) PE=1 SV=1	K	Transcription	PREDICTED: BEL1-like homeodomain protein 1 [Populus euphratica]
F01_c1728/f7p4/4035	--	--	Molecular Function: nucleotide binding (GO:0000166);; Molecular Function: sequence-specific DNA binding transcription factor activity (GO:0003700);; Cellular Component: nucleus (GO:0005634);; Biological Process: regulation of transcription, DNA-templated (GO:0006355);; Molecular Function: zinc ion binding (GO:0008270);; Biological Process: response to light intensity (GO:0009642);; Biological Pro…	K12236|0|vvi:100268010|NF-X1-type zinc finger protein NFXL1-like; K12236 transcriptional repressor NF-X1 [EC:6.3.2.-] (A)	[K]	Transcription	NF-X1 type zinc finger	NF-X1-type zinc finger protein NFXL1 GN=NFXL1 OS=Arabidopsis thaliana (Mouse-ear cress) PE=2 SV=1	K	Transcription	PREDICTED: NF-X1-type zinc finger protein NFXL1-like [Vitis vinifera]
F01_c9161/f1p0/1308	--	--	--	--	--	--	Autophagy-related protein 27;; Mannose-6-phosphate receptor	--	R	General function prediction only	PREDICTED: uncharacterized protein LOC100255420 [Vitis vinifera]
F01_c6193/f1p10/1214	[KL]	--	--	K11654|2.26323e-135|cit:102630394|putative chromatin-remodeling complex ATPase chain-like; K11654 SWI/SNF-related matrix-associated actin-dependent regulator of chromatin subfamily A member 5 [EC:3.6.4.-] (A)	[K]	Transcription	SLIDE	Putative chromatin-remodeling complex ATPase chain GN=At3g06400 OS=Arabidopsis thaliana (Mouse-ear cress) PE=2 SV=3	K	Transcription	PREDICTED: putative chromatin-remodeling complex ATPase chain [Tarenaya hassleriana]
F01_c9438/f1p1/4112	--	--	Cellular Component: chloroplast inner membrane (GO:0009706);; Molecular Function: hydrogen ion transmembrane transporter activity (GO:0015078);; Biological Process: proton transport (GO:0015992);; Cellular Component: integral component of membrane (GO:0016021);;	--	--	--	Ycf4	Chloroplast envelope membrane protein OS=Gossypium barbadense (Sea-island cotton) PE=3 SV=1	C	Energy production and conversion	chloroplast envelope protein (chloroplast) [Paeonia sp. Sd0052]
F01_c3327/f1p0/1785	--	--	Cellular Component: integral component of membrane (GO:0016021);;	--	--	--	Sulfite exporter TauE/SafE	--	S	Function unknown	PREDICTED: uncharacterized protein LOC101294092 [Fragaria vesca subsp. vesca]
F01_c10112/f1p10/3399	[G]	Carbohydrate transport and metabolism	Molecular Function: hydrolase activity (GO:0016787);;	K18577|0|vvi:100254646|mannosylglycoprotein endo-beta-mannosidase; K18577 mannosylglycoprotein endo-beta-mannosidase [EC:3.2.1.152] (A)	[G]	Carbohydrate transport and metabolism	Glycosyl hydrolases family 2, sugar binding domain	Mannosylglycoprotein endo-beta-mannosidase 42 kDa subunit GN=EBM OS=Lilium longiflorum (Trumpet lily) PE=1 SV=4	G	Carbohydrate transport and metabolism	unnamed protein product [Vitis vinifera]
F01_c3942/f1p1/3693	--	--	Molecular Function: phosphoric ester hydrolase activity (GO:0042578);;	--	[I]	Lipid transport and metabolism	SacI homology domain	Phosphoinositide phosphatase SAC4 GN=SAC4 OS=Arabidopsis thaliana (Mouse-ear cress) PE=2 SV=1	I	Lipid transport and metabolism	PREDICTED: phosphoinositide phosphatase SAC3-like isoform X1 [Populus euphratica]
F01_c2928/f5p14/3647	--	--	Molecular Function: structural molecule activity (GO:0005198);; Biological Process: intracellular protein transport (GO:0006886);; Biological Process: vesicle-mediated transport (GO:0016192);; Cellular Component: clathrin coat of trans-Golgi network vesicle (GO:0030130);; Cellular Component: clathrin coat of coated pit (GO:0030132);;	K04646|0|csv:101222626|clathrin heavy chain 1-like; K04646 clathrin heavy chain (A)	[U]	Intracellular trafficking, secretion, and vesicular transport	Region in Clathrin and VPS	Clathrin heavy chain 1 OS=Oryza sativa subsp. japonica (Rice) PE=3 SV=1	U	Intracellular trafficking, secretion, and vesicular transport	Clathrin heavy chain 1 [Morus notabilis]
F01_c5972/f1p7/2102	--	--	Molecular Function: nucleotide binding (GO:0000166);; Molecular Function: nucleic acid binding (GO:0003676);; Molecular Function: Rho guanyl-nucleotide exchange factor activity (GO:0005089);; Molecular Function: oxidoreductase activity, acting on paired donors, with incorporation or reduction of molecular oxygen, 2-oxoglutarate as one donor, and incorporation of one atom each of oxygen into both …	--	--	--	PRONE (Plant-specific Rop nucleotide exchanger)	Rop guanine nucleotide exchange factor 14 GN=ROPGEF14 OS=Arabidopsis thaliana (Mouse-ear cress) PE=1 SV=1	R	General function prediction only	PREDICTED: rop guanine nucleotide exchange factor 14 [Vitis vinifera]
F01_c6482/f1p83/2079	[R]	General function prediction only	Molecular Function: structural molecule activity (GO:0005198);; Cellular Component: plasma membrane (GO:0005886);; Biological Process: intracellular protein transport (GO:0006886);; Biological Process: vesicle-mediated transport (GO:0016192);; Molecular Function: myosin heavy chain kinase activity (GO:0016905);; Cellular Component: COPI vesicle coat (GO:0030126);;	K05236|0|pop:POPTR_0015s08110g|POPTRDRAFT_575095; coatomer alpha subunit-like family protein; K05236 coatomer protein complex, subunit alpha (xenin) (A)	[U]	Intracellular trafficking, secretion, and vesicular transport	Coatomer (COPI) alpha subunit C-terminus;; Coatomer WD associated region	Coatomer subunit alpha-1 GN=At1g62020 OS=Arabidopsis thaliana (Mouse-ear cress) PE=2 SV=2	U	Intracellular trafficking, secretion, and vesicular transport	hypothetical protein JCGZ_26756 [Jatropha curcas]
F01_c21482/f3p26/3541	--	--	--	--	--	--	Plant calmodulin-binding domain	--	S	Function unknown	PREDICTED: protein FYV8 isoform X1 [Vitis vinifera]
F01_c14544/f1p4/2737	--	--	--	--	--	--	--	--	S	Function unknown	PREDICTED: uncharacterized protein LOC100249600 [Vitis vinifera]
F01_c18181/f2p0/4236	[S]	Function unknown	--	--	[T]	Signal transduction mechanisms	Leucine Rich repeats (2 copies);; Leucine Rich Repeat	Putative disease resistance RPP13-like protein 1 GN=RPPL1 OS=Arabidopsis thaliana (Mouse-ear cress) PE=3 SV=1	T	Signal transduction mechanisms	PREDICTED: putative disease resistance RPP13-like protein 1 [Vitis vinifera]
F01_c15486/f1p2/3936	[RTKL]	--	Molecular Function: protein kinase activity (GO:0004672);;	--	[T]	Signal transduction mechanisms	Ethylene-responsive protein kinase Le-CTR1	Serine/threonine-protein kinase EDR1 GN=F22O13.20 OS=Arabidopsis thaliana (Mouse-ear cress) PE=1 SV=1	T	Signal transduction mechanisms	hypothetical protein PRUPE_ppa000689mg [Prunus persica]
F01_c11919/f1p0/2203	--	--	Molecular Function: ATP binding (GO:0005524);; Cellular Component: plasma membrane (GO:0005886);; Biological Process: ATP catabolic process (GO:0006200);; Biological Process: ATP biosynthetic process (GO:0006754);; Biological Process: cation transport (GO:0006812);; Cellular Component: integral component of membrane (GO:0016021);; Molecular Function: cation-transporting ATPase activity (GO:001982…	K01535|0|fve:101306650|ATPase 9, plasma membrane-type-like; K01535 H+-transporting ATPase [EC:3.6.3.6] (A)	[P]	Inorganic ion transport and metabolism	Putative hydrolase of sodium-potassium ATPase alpha subunit	ATPase 9, plasma membrane-type GN=AHA9 OS=Arabidopsis thaliana (Mouse-ear cress) PE=2 SV=2	P	Inorganic ion transport and metabolism	PREDICTED: ATPase 9, plasma membrane-type-like [Fragaria vesca subsp. vesca]
F01_c915/f1p0/812	--	--	Biological Process: cytokinesis (GO:0000910);; Molecular Function: receptor activity (GO:0004872);; Cellular Component: endoplasmic reticulum lumen (GO:0005788);; Molecular Function: zinc ion binding (GO:0008270);; Biological Process: auxin-activated signaling pathway (GO:0009734);; Biological Process: unidimensional cell growth (GO:0009826);; Molecular Function: auxin binding (GO:0010011);; Mole…	--	--	--	Auxin binding protein;; Cupin domain	Auxin-binding protein T92 (Precursor) GN=T92 OS=Nicotiana tabacum (Common tobacco) PE=3 SV=1	T	Signal transduction mechanisms	hypothetical protein CICLE_v10022400mg [Citrus clementina]
F01_c7219/f1p0/3647	--	--	--	--	[K]	Transcription	--	--	K	Transcription	hypothetical protein POPTR_0012s07900g [Populus trichocarpa]
F01_c16797/f1p3/3689	[M]	Cell wall/membrane/envelope biogenesis	Molecular Function: zinc ion binding (GO:0008270);; Cellular Component: integral component of membrane (GO:0016021);; Molecular Function: cellulose synthase (UDP-forming) activity (GO:0016760);; Biological Process: cellulose biosynthetic process (GO:0030244);;	K10999|0|vvi:100242715|probable cellulose synthase A catalytic subunit 5 [UDP-forming]; K10999 cellulose synthase A [EC:2.4.1.12] (A)	--	--	Cellulose synthase;; Zinc-binding RING-finger;; Glycosyltransferase like family 2;; Glycosyl transferase family group 2	Probable cellulose synthase A catalytic subunit 5 [UDP-forming] OS=Oryza sativa subsp. japonica (Rice) PE=2 SV=1	O	Posttranslational modification, protein turnover, chaperones	cellulose synthase 6 [Paeonia lactiflora]
F01_c521/f1p5/845	[I]	Lipid transport and metabolism	Molecular Function: acetate-CoA ligase activity (GO:0003987);; Molecular Function: AMP binding (GO:0016208);; Biological Process: acetyl-CoA biosynthetic process from acetate (GO:0019427);;	K01895|1.79841e-83|rcu:RCOM_1443610|acetyl-CoA synthetase, putative (EC:6.2.1.1); K01895 acetyl-CoA synthetase [EC:6.2.1.1] (A)	[I]	Lipid transport and metabolism	AMP-binding enzyme C-terminal domain;; AMP-binding enzyme	Acetyl-coenzyme A synthetase, chloroplastic/glyoxysomal (Precursor) GN=ACS OS=Arabidopsis thaliana (Mouse-ear cress) PE=1 SV=1	I	Lipid transport and metabolism	acetyl-CoA synthetase, putative [Ricinus communis]
F01_c14097/f2p5/3436	[R]	General function prediction only	Biological Process: mRNA splicing, via spliceosome (GO:0000398);; Cellular Component: nucleus (GO:0005634);; Biological Process: response to cold (GO:0009409);;	K12855|0|pvu:PHAVU_005G104900g|hypothetical protein; K12855 pre-mRNA-processing factor 6 (A)	[A]	RNA processing and modification	PRP1 splicing factor, N-terminal	Protein STABILIZED1 GN=F9H3.5 OS=Arabidopsis thaliana (Mouse-ear cress) PE=1 SV=1	A	RNA processing and modification	hypothetical protein PHAVU_005G104900g [Phaseolus vulgaris]
F01_c15645/f1p36/1266	[U]	Intracellular trafficking, secretion, and vesicular transport	--	--	--	--	WD40-like Beta Propeller Repeat;; Dipeptidyl peptidase IV (DPP IV) N-terminal region	--	S	Function unknown	PREDICTED: uncharacterized protein LOC100267814 [Vitis vinifera]
F01_c12506/f1p1/2247	[J]	Translation, ribosomal structure and biogenesis	Molecular Function: GTPase activity (GO:0003924);; Molecular Function: GTP binding (GO:0005525);; Biological Process: GTP catabolic process (GO:0006184);;	K03234|0|cit:102616841|elongation factor 2-like; K03234 elongation factor 2 (A)	[J]	Translation, ribosomal structure and biogenesis	Elongation Factor G, domain II;; Elongation factor Tu domain 2	Elongation factor 2 OS=Beta vulgaris (Sugar beet) PE=2 SV=1	J	Translation, ribosomal structure and biogenesis	eukaryotic translation elongation factor [Hevea brasiliensis]
F01_c7530/f2p0/1604	--	--	Cellular Component: integral component of membrane (GO:0016021);; Biological Process: transmembrane transport (GO:0055085);;	K15111|8.22688e-129|cic:CICLE_v10021207mg|hypothetical protein; K15111 solute carrier family 25 (mitochondrial S-adenosylmethionine transporter), member 26 (A)	[C]	Energy production and conversion	Mitochondrial carrier protein	S-adenosylmethionine carrier 1, chloroplastic/mitochondrial (Precursor) GN=F23K16.90 OS=Arabidopsis thaliana (Mouse-ear cress) PE=1 SV=1	C	Energy production and conversion	hypothetical protein CICLE_v10021207mg [Citrus clementina]
F01_c3938/f1p5/1203	--	--	Molecular Function: protein serine/threonine kinase activity (GO:0004674);; Molecular Function: non-membrane spanning protein tyrosine kinase activity (GO:0004715);; Molecular Function: ATP binding (GO:0005524);; Biological Process: protein phosphorylation (GO:0006468);;	K13430|4.7492e-107|mdm:103452185|serine/threonine-protein kinase PBS1-like; K13430 serine/threonine-protein kinase PBS1 [EC:2.7.11.1] (A)	[T]	Signal transduction mechanisms	Protein kinase domain;; Protein tyrosine kinase	Serine/threonine-protein kinase PBS1 GN=PBS1 OS=Arabidopsis thaliana (Mouse-ear cress) PE=1 SV=1	T	Signal transduction mechanisms	PREDICTED: serine/threonine-protein kinase PBS1-like [Malus domestica]
F01_c605/f1p0/775	[T]	Signal transduction mechanisms	Biological Process: response to stress (GO:0006950);;	--	--	--	Universal stress protein family	--	S	Function unknown	PREDICTED: universal stress protein A-like protein [Eucalyptus grandis]
F01_c12278/f1p2/1228	[S]	Function unknown	Molecular Function: nucleotide binding (GO:0000166);; Cellular Component: cell wall (GO:0005618);; Biological Process: defense response (GO:0006952);; Biological Process: signal transduction (GO:0007165);; Cellular Component: plasmodesma (GO:0009506);; Cellular Component: chloroplast (GO:0009507);; Biological Process: UV protection (GO:0009650);; Cellular Component: membrane (GO:0016020);; Biolog…	--	[R]	General function prediction only	Leucine Rich Repeat;; Leucine rich repeat;; Leucine Rich repeats (2 copies);; Leucine Rich repeat;; Leucine rich repeat N-terminal domain;; Leucine rich repeat	DNA-damage-repair/toleration protein DRT100 (Precursor) OS=Arabidopsis thaliana (Mouse-ear cress) PE=2 SV=2	R	General function prediction only	PREDICTED: DNA-damage-repair/toleration protein DRT100-like [Sesamum indicum]
F01_c8639/f1p4/1216	--	--	Molecular Function: DNA binding (GO:0003677);; Biological Process: regulation of transcription, DNA-templated (GO:0006355);;	--	--	--	No apical meristem (NAM) protein	NAC transcription factor NAM-2 GN=NAM-2 OS=Hordeum vulgare var. distichum (Domesticated barley) PE=3 SV=1	K	Transcription	PREDICTED: NAC transcription factor ONAC010-like [Fragaria vesca subsp. vesca]
F01_c14015/f1p0/2335	--	--	--	--	--	--	Cellulose synthase	Cellulose synthase-like protein B2 GN=CSLB2 OS=Arabidopsis thaliana (Mouse-ear cress) PE=2 SV=1	S	Function unknown	PREDICTED: cellulose synthase-like protein H1 [Musa acuminata subsp. malaccensis]
F01_c3280/f2p3/2239	[RTKL]	--	Molecular Function: protein serine/threonine kinase activity (GO:0004674);; Molecular Function: ATP binding (GO:0005524);; Biological Process: protein phosphorylation (GO:0006468);; Biological Process: protein N-linked glycosylation (GO:0006487);;	--	[T]	Signal transduction mechanisms	Protein kinase domain;; Protein tyrosine kinase	Casein kinase I isoform delta-like GN=At4g26100 OS=Arabidopsis thaliana (Mouse-ear cress) PE=2 SV=2	T	Signal transduction mechanisms	PREDICTED: uncharacterized protein LOC100263956 [Vitis vinifera]
F01_c5486/f1p2/1035	--	--	Cellular Component: mitochondrion (GO:0005739);; Biological Process: cell death (GO:0008219);; Cellular Component: chloroplast envelope (GO:0009941);;	--	--	--	Protein of unknown function (DUF3353)	--	S	Function unknown	PREDICTED: uncharacterized protein LOC103455463 [Malus domestica]
F01_c16419/f1p5/1074	[R]	General function prediction only	Molecular Function: nucleotide binding (GO:0000166);; Molecular Function: sequence-specific DNA binding transcription factor activity (GO:0003700);; Cellular Component: heterotrimeric G-protein complex (GO:0005834);; Biological Process: regulation of gene expression by genetic imprinting (GO:0006349);; Biological Process: regulation of transcription, DNA-templated (GO:0006355);; Cellular Componen…	K11462|9.15707e-120|dosa:Os08t0137250-01|Os08g0137250, FIE1, FERTILIZATION-INDEPENDENT_ENDOSPERM_1; Similar to Fertilization independent endosperm.; K11462 polycomb protein EED (A)	[K]	Transcription	WD domain, G-beta repeat	Polycomb group protein FIE2 GN=FIE2 OS=Zea mays (Maize) PE=2 SV=1	K	Transcription	putative Polycomb group protein FIE2 [Oryza sativa Japonica Group]
F01_c15807/f1p2/2359	[O]	Posttranslational modification, protein turnover, chaperones	Cellular Component: membrane (GO:0016020);;	--	[C]	Energy production and conversion	SPFH domain / Band 7 family	Hypersensitive-induced response protein 1 GN=HIR1 OS=Arabidopsis thaliana (Mouse-ear cress) PE=1 SV=1	O	Posttranslational modification, protein turnover, chaperones	PREDICTED: hypersensitive-induced response protein 1 [Sesamum indicum]
F01_c3064/f4p8/1374	--	--	--	--	--	--	F-box domain;; F-box-like	F-box/kelch-repeat protein At3g23880 GN=At3g23880 OS=Arabidopsis thaliana (Mouse-ear cress) PE=2 SV=1	R	General function prediction only	S-locus F-box protein type-5 [Solanum habrochaites]
F01_c5943/f1p0/1676	--	--	--	--	--	--	--	--	S	Function unknown	Transcription factor SUM-1 [Gossypium arboreum]
F01_c6026/f2p0/2003	--	--	Molecular Function: binding (GO:0005488);;	--	[R]	General function prediction only	Reverse transcriptase (RNA-dependent DNA polymerase)	Endonuclease OS=Nicotiana tabacum (Common tobacco) PE=2 SV=1	R	General function prediction only	retrotransposon polyprotein [Rosa rugosa]
F01_c14782/f1p0/2521	[I]	Lipid transport and metabolism	--	--	[R]	General function prediction only	Carboxylesterase family	--	R	General function prediction only	hypothetical protein PTT_05985 [Pyrenophora teres f. teres 0-1]
F01_c14926/f1p0/3664	[M]	Cell wall/membrane/envelope biogenesis	Cellular Component: endosome (GO:0005768);; Cellular Component: Golgi apparatus (GO:0005794);; Cellular Component: trans-Golgi network (GO:0005802);; Biological Process: glycolytic process (GO:0006096);; Biological Process: calcium ion transport (GO:0006816);; Biological Process: water transport (GO:0006833);; Biological Process: defense response (GO:0006952);; Biological Process: hyperosmotic re…	K10999|0|sly:101246863|cellulose synthase A catalytic subunit 3 [UDP-forming]; K10999 cellulose synthase A [EC:2.4.1.12] (A)	--	--	Cellulose synthase	Probable cellulose synthase A catalytic subunit 8 [UDP-forming] OS=Oryza sativa subsp. japonica (Rice) PE=2 SV=1	O	Posttranslational modification, protein turnover, chaperones	PREDICTED: cellulose synthase A catalytic subunit 3 [UDP-forming] [Solanum lycopersicum]
F01_c14582/f1p4/1278	--	--	--	--	--	--	Protein of unknown function (DUF760)	--	S	Function unknown	hypothetical protein CICLE_v10001788mg [Citrus clementina]
F01_c1777/f4p2/1360	--	--	Molecular Function: DNA binding (GO:0003677);;	K14432|4.57363e-93|vvi:100262305|G-box-binding factor 4; K14432 ABA responsive element binding factor (A)	--	--	bZIP transcription factor;; Basic region leucine zipper	G-box-binding factor 4 GN=F21M11.10 OS=Arabidopsis thaliana (Mouse-ear cress) PE=1 SV=1	K	Transcription	PREDICTED: G-box-binding factor 4 [Vitis vinifera]
F01_c11465/f1p1/3291	[RTKL]	--	Molecular Function: protein serine/threonine kinase activity (GO:0004674);; Molecular Function: ATP binding (GO:0005524);; Biological Process: protein phosphorylation (GO:0006468);; Cellular Component: integral component of membrane (GO:0016021);;	--	--	--	Leucine Rich Repeat	Leucine-rich repeat receptor-like serine/threonine-protein kinase BAM1 (Precursor) GN=BAM1 OS=Arabidopsis thaliana (Mouse-ear cress) PE=1 SV=1	T	Signal transduction mechanisms	PREDICTED: leucine-rich repeat receptor-like serine/threonine-protein kinase BAM3 [Pyrus x bretschneideri]
F01_c11850/f1p12/2644	--	--	Molecular Function: sequence-specific DNA binding transcription factor activity (GO:0003700);; Cellular Component: nucleus (GO:0005634);; Biological Process: regulation of transcription, DNA-templated (GO:0006355);; Molecular Function: sequence-specific DNA binding (GO:0043565);;	--	[K]	Transcription	Associated with HOX;; Homeobox KN domain;; Homeobox domain	BEL1-like homeodomain protein 6 GN=BLH6 OS=Arabidopsis thaliana (Mouse-ear cress) PE=1 SV=1	K	Transcription	PREDICTED: BEL1-like homeodomain protein 3 [Vitis vinifera]
F01_c4945/f1p4/1384	--	--	Cellular Component: mitochondrion (GO:0005739);;	--	--	--	--	Putative cytochrome c biogenesis ccmF-like mitochondrial protein GN=CCMFC OS=Arabidopsis thaliana (Mouse-ear cress) PE=1 SV=2	S	Function unknown	PREDICTED: putative cytochrome c biogenesis ccmF-like mitochondrial protein [Nicotiana sylvestris]
F01_c14824/f1p1/3982	[O]	Posttranslational modification, protein turnover, chaperones	Molecular Function: acid-amino acid ligase activity (GO:0016881);;	K10581|0|mdm:103444912|probable ubiquitin-conjugating enzyme E2 23; K10581 ubiquitin-conjugating enzyme E2 O [EC:6.3.2.19] (A)	[O]	Posttranslational modification, protein turnover, chaperones	Ubiquitin-conjugating enzyme	Probable ubiquitin-conjugating enzyme E2 23 GN=UBC23 OS=Arabidopsis thaliana (Mouse-ear cress) PE=1 SV=1	O	Posttranslational modification, protein turnover, chaperones	PREDICTED: probable ubiquitin-conjugating enzyme E2 23 [Nicotiana sylvestris]
F01_c17549/f1p77/1710	--	--	--	--	--	--	Cupin;; Cupin domain;; ARD/ARD' family	11S globulin seed storage protein 2 basic chain (Precursor) OS=Sesamum indicum (Oriental sesame) PE=2 SV=1	R	General function prediction only	PREDICTED: 11S globulin seed storage protein 2-like [Solanum tuberosum]
F01_c11624/f1p8/2484	[I]	Lipid transport and metabolism	Molecular Function: acetyl-CoA carboxylase activity (GO:0003989);; Molecular Function: ATP binding (GO:0005524);; Biological Process: fatty acid biosynthetic process (GO:0006633);; Molecular Function: zinc ion binding (GO:0008270);; Cellular Component: acetyl-CoA carboxylase complex (GO:0009317);; Cellular Component: chloroplast stroma (GO:0009570);; Molecular Function: transferase activity (GO:0…	K01963|0|tcc:ThcaC_p029|accD; acetyl-CoA carboxylase carboxyltransferase beta subunit; K01963 acetyl-CoA carboxylase carboxyl transferase subunit beta [EC:6.4.1.2] (A)	[EI]	--	Carboxyl transferase domain	Acetyl-coenzyme A carboxylase carboxyl transferase subunit beta, chloroplastic {ECO:0000255|HAMAP-Rule:MF_01395} OS=Platanus occidentalis (Sycamore) PE=3 SV=1	H	Coenzyme transport and metabolism	acetyl-CoA carboxylase carboxyl transferase beta (chloroplast) [Paeonia sp. Sd0052]
F01_c3711/f1p0/1075	--	--	Biological Process: double-strand break repair via homologous recombination (GO:0000724);; Molecular Function: double-stranded DNA binding (GO:0003690);; Molecular Function: single-stranded DNA binding (GO:0003697);; Molecular Function: protein binding (GO:0005515);; Cellular Component: nucleus (GO:0005634);; Cellular Component: mitochondrion (GO:0005739);; Molecular Function: cobalt ion binding …	--	--	--	--	--	S	Function unknown	PREDICTED: uncharacterized protein LOC104450743 [Eucalyptus grandis]
F01_c2614/f6p7/3159	--	--	Biological Process: embryo sac development (GO:0009553);;	K14832|0|vvi:100249732|CCAAT/enhancer-binding protein zeta; K14832 ribosome biogenesis protein MAK21 (A)	[JK]	--	CBF/Mak21 family	--	875	CCAAT enhancer-binding protein	hypothetical protein L484_003584 [Morus notabilis]
F01_c2054/f5p4/3139	--	--	Molecular Function: monooxygenase activity (GO:0004497);; Cellular Component: endosome (GO:0005768);; Cellular Component: Golgi apparatus (GO:0005794);; Cellular Component: trans-Golgi network (GO:0005802);; Biological Process: metabolic process (GO:0008152);; Biological Process: respiratory chain complex IV assembly (GO:0008535);; Cellular Component: integral component of membrane (GO:0016021);;	--	[D]	Cell cycle control, cell division, chromosome partitioning	DOMON domain;; Cytochrome C assembly protein;; Eukaryotic cytochrome b561;; Domain of unknown function (DUF2427)	Cytochrome b561, DM13 and DOMON domain-containing protein At5g54830 (Precursor) GN=At5g54830 OS=Arabidopsis thaliana (Mouse-ear cress) PE=2 SV=1	2070	DOMON domain containing protein, expressed	PREDICTED: cytochrome b561, DM13 and DOMON domain-containing protein At5g54830 [Vitis vinifera]
F01_c16159/f1p2/1781	--	--	Molecular Function: carboxypeptidase activity (GO:0004180);; Biological Process: proteolysis (GO:0006508);; Molecular Function: serine-type peptidase activity (GO:0008236);;	K01285|0|vvi:100252778|lysosomal Pro-X carboxypeptidase-like; K01285 lysosomal Pro-X carboxypeptidase [EC:3.4.16.2] (A)	[OR]	--	Serine carboxypeptidase S28	Probable serine protease EDA2 (Precursor) GN=EDA2 OS=Arabidopsis thaliana (Mouse-ear cress) PE=2 SV=2	O	Posttranslational modification, protein turnover, chaperones	PREDICTED: lysosomal Pro-X carboxypeptidase-like [Vitis vinifera]
F01_c10392/f1p1/3218	--	--	Molecular Function: translation initiation factor activity (GO:0003743);; Cellular Component: transcription factor TFIID complex (GO:0005669);; Biological Process: DNA-templated transcription, initiation (GO:0006352);; Biological Process: translational initiation (GO:0006413);; Molecular Function: protein heterodimerization activity (GO:0046982);;	K03129|0|vvi:100252311|transcription initiation factor TFIID subunit 4b-like; K03129 transcription initiation factor TFIID subunit 4 (A)	[K]	Transcription	Transcription initiation factor TFIID component TAF4 family	Transcription initiation factor TFIID subunit 4b GN=TAF4B OS=Arabidopsis thaliana (Mouse-ear cress) PE=1 SV=1	K	Transcription	PREDICTED: transcription initiation factor TFIID subunit 4b-like [Vitis vinifera]
F01_c16579/f3p9/2855	[TK]	--	Molecular Function: catalytic activity (GO:0003824);; Biological Process: guanosine tetraphosphate metabolic process (GO:0015969);;	--	[T]	Signal transduction mechanisms	HD domain;; Region found in RelA / SpoT proteins;; HD domain	Probable GTP diphosphokinase RSH3, chloroplastic (Precursor) GN=RSH3 OS=Arabidopsis thaliana (Mouse-ear cress) PE=2 SV=1	T	Signal transduction mechanisms	PREDICTED: uncharacterized protein LOC103327621 [Prunus mume]
F01_c7208/f1p0/1520	--	--	--	--	[R]	General function prediction only	Domain of unknown function	--	R	General function prediction only	Ankyrin repeat domain-containing protein [Medicago truncatula]
F01_c15588/f1p17/2045	[M]	Cell wall/membrane/envelope biogenesis	Cellular Component: cytosol (GO:0005829);; Biological Process: starch metabolic process (GO:0005982);; Biological Process: sucrose biosynthetic process (GO:0005986);; Cellular Component: plant-type cell wall (GO:0009505);; Biological Process: seed maturation (GO:0010431);; Cellular Component: membrane (GO:0016020);; Molecular Function: sucrose synthase activity (GO:0016157);; Biological Process: …	K00695|0|tcc:TCM_021253|Sucrose synthase 2 isoform 1; K00695 sucrose synthase [EC:2.4.1.13] (A)	[M]	Cell wall/membrane/envelope biogenesis	Sucrose synthase	Sucrose synthase 2 GN=K21P3.6 OS=Arabidopsis thaliana (Mouse-ear cress) PE=2 SV=3	M	Cell wall/membrane/envelope biogenesis	Sucrose synthase 2 isoform 1 [Theobroma cacao]
F01_c15809/f1p0/1537	--	--	--	--	--	--	Ankyrin repeat;; Ankyrin repeats (3 copies);; Ankyrin repeat;; Ankyrin repeats (many copies)	Probable E3 ubiquitin-protein ligase XBOS34 OS=Oryza sativa subsp. japonica (Rice) PE=2 SV=1	O	Posttranslational modification, protein turnover, chaperones	hypothetical protein JCGZ_17681 [Jatropha curcas]
F01_c3690/f2p1/1151	[R]	General function prediction only	Molecular Function: Hsp90 protein binding (GO:0051879);;	--	[R]	General function prediction only	TPR repeat;; Tetratricopeptide repeat;; Tetratricopeptide repeat;; Tetratricopeptide repeat;; Tetratricopeptide repeat;; Tetratricopeptide repeat;; Tetratricopeptide repeat;; Tetratricopeptide repeat;; Tetratricopeptide repeat;; Anaphase-promoting complex, cyclosome, subunit 3;; Tetratricopeptide repeat;; Tetratricopeptide repeat	TPR repeat-containing thioredoxin TTL4 GN=TTL4 OS=Arabidopsis thaliana (Mouse-ear cress) PE=2 SV=1	R	General function prediction only	Tetratricopeptide repeat (TPR)-like superfamily protein [Theobroma cacao]
F01_c4402/f3p4/2247	[M]	Cell wall/membrane/envelope biogenesis	Cellular Component: membrane (GO:0016020);; Molecular Function: transferase activity, transferring glycosyl groups (GO:0016757);; Cellular Component: cell part (GO:0044464);;	--	--	--	Cellulose synthase;; Glycosyltransferase like family 2	Cellulose synthase-like protein E6 GN=P0556A05.32 OS=Oryza sativa subsp. japonica (Rice) PE=2 SV=1	S	Function unknown	PREDICTED: cellulose synthase-like protein E6 [Vitis vinifera]
F01_c15187/f1p2/2301	[R]	General function prediction only	--	K14018|0|pper:PRUPE_ppa001837mg|hypothetical protein; K14018 phospholipase A-2-activating protein (A)	[I]	Lipid transport and metabolism	PUL domain;; PFU (PLAA family ubiquitin binding);; WD domain, G-beta repeat	Dynein assembly factor with WDR repeat domains 1 GN=DAW1 OS=Chlamydomonas reinhardtii (Chlamydomonas smithii) PE=1 SV=1	I	Lipid transport and metabolism	hypothetical protein PRUPE_ppa001837mg [Prunus persica]
F01_c17136/f1p2/3391	[R]	General function prediction only	Molecular Function: nucleic acid binding (GO:0003676);; Cellular Component: nucleus (GO:0005634);; Molecular Function: zinc ion binding (GO:0008270);;	K10624|2.29294e-168|vvi:100854867|E3 ubiquitin-protein ligase RBBP6; K10624 E3 ubiquitin-protein ligase RBBP6 [EC:6.3.2.19] (A)	[O]	Posttranslational modification, protein turnover, chaperones	DWNN domain	--	O	Posttranslational modification, protein turnover, chaperones	hypothetical protein VITISV_001078 [Vitis vinifera]
F01_c8999/f2p3/2856	--	--	Biological Process: selenium compound metabolic process (GO:0001887);; Cellular Component: cytosol (GO:0005829);; Molecular Function: S-adenosylmethionine-dependent methyltransferase activity (GO:0008757);; Biological Process: biosynthetic process (GO:0009058);; Molecular Function: pyridoxal phosphate binding (GO:0030170);; Biological Process: methylation (GO:0032259);; Biological Process: S-aden…	K08247|0|vvi:100264437|methionine S-methyltransferase; K08247 methionine S-methyltransferase [EC:2.1.1.12] (A)	--	--	Aminotransferase class I and II	Methionine S-methyltransferase GN=K21G20.2 OS=Arabidopsis thaliana (Mouse-ear cress) PE=1 SV=1	R	General function prediction only	PREDICTED: methionine S-methyltransferase [Vitis vinifera]
F01_c10327/f2p0/2391	--	--	Molecular Function: catalytic activity (GO:0003824);; Biological Process: metabolic process (GO:0008152);;	--	--	--	Peptidase family S64	--	S	Function unknown	hypothetical protein CICLE_v10019372mg [Citrus clementina]
F01_c12470/f1p6/2461	[R]	General function prediction only	Molecular Function: protein kinase activity (GO:0004672);; Molecular Function: ATP binding (GO:0005524);; Biological Process: protein phosphorylation (GO:0006468);; Cellular Component: plastoglobule (GO:0010287);; Biological Process: chlorophyll catabolic process (GO:0015996);; Biological Process: response to photooxidative stress (GO:0080183);;	--	[R]	General function prediction only	--	Uncharacterized aarF domain-containing protein kinase At4g31390, chloroplastic (Precursor) GN=At4g31390 OS=Arabidopsis thaliana (Mouse-ear cress) PE=2 SV=1	R	General function prediction only	PREDICTED: uncharacterized aarF domain-containing protein kinase At4g31390, chloroplastic [Vitis vinifera]
F01_c10295/f1p8/2076	--	--	--	--	--	--	--	--	S	Function unknown	PREDICTED: uncharacterized protein LOC100254432 [Vitis vinifera]
F01_c7952/f1p0/2335	[E]	Amino acid transport and metabolism	Biological Process: transport (GO:0006810);; Cellular Component: membrane (GO:0016020);;	--	[E]	Amino acid transport and metabolism	POT family	Protein NRT1/ PTR FAMILY 6.1 GN=NPF6.1 OS=Arabidopsis thaliana (Mouse-ear cress) PE=2 SV=1	E	Amino acid transport and metabolism	PREDICTED: protein NRT1/ PTR FAMILY 6.1 isoform X1 [Vitis vinifera]
F01_c13075/f1p3/2079	[RTKL]	--	Cellular Component: ubiquitin ligase complex (GO:0000151);; Molecular Function: protein serine/threonine kinase activity (GO:0004674);; Molecular Function: ubiquitin-protein transferase activity (GO:0004842);; Molecular Function: ATP binding (GO:0005524);; Biological Process: protein phosphorylation (GO:0006468);; Biological Process: response to stress (GO:0006950);; Biological Process: protein u…	--	--	--	Protein kinase domain;; Protein tyrosine kinase;; U-box domain	Serine/threonine-protein kinase OS=Arabidopsis thaliana (Mouse-ear cress) PE=1 SV=2	T	Signal transduction mechanisms	PREDICTED: U-box domain-containing protein 35-like isoform X1 [Vitis vinifera]
F01_c15312/f1p4/2429	[RTKL]	--	Cellular Component: ubiquitin ligase complex (GO:0000151);; Molecular Function: protein serine/threonine kinase activity (GO:0004674);; Molecular Function: ubiquitin-protein transferase activity (GO:0004842);; Molecular Function: ATP binding (GO:0005524);; Biological Process: protein phosphorylation (GO:0006468);; Biological Process: response to stress (GO:0006950);; Biological Process: protein u…	--	--	--	Protein kinase domain;; Protein tyrosine kinase;; U-box domain	Serine/threonine-protein kinase GN=PUB33 OS=Arabidopsis thaliana (Mouse-ear cress) PE=2 SV=2	T	Signal transduction mechanisms	hypothetical protein JCGZ_14392 [Jatropha curcas]
F01_c14910/f1p2/3839	--	--	--	--	--	--	PB1 domain	Protein NLP9 GN=NLP9 OS=Arabidopsis thaliana (Mouse-ear cress) PE=2 SV=1	K	Transcription	hypothetical protein POPTR_0007s01530g [Populus trichocarpa]
F01_c1897/f6p1/2790	[LKJ]	--	Molecular Function: RNA binding (GO:0003723);; Molecular Function: ATP binding (GO:0005524);; Cellular Component: nucleus (GO:0005634);; Molecular Function: ATP-dependent helicase activity (GO:0008026);;	K14808|0|vvi:100257398|putative DEAD-box ATP-dependent RNA helicase 29; K14808 ATP-dependent RNA helicase DDX54/DBP10 [EC:3.6.4.13] (A)	[A]	RNA processing and modification	DEAD/DEAH box helicase;; Helicase conserved C-terminal domain;; Type III restriction enzyme, res subunit	Putative DEAD-box ATP-dependent RNA helicase 29 GN=RH29 OS=Arabidopsis thaliana (Mouse-ear cress) PE=3 SV=1	A	RNA processing and modification	PREDICTED: putative DEAD-box ATP-dependent RNA helicase 29 isoform X2 [Eucalyptus grandis]
F01_c5896/f1p0/1654	--	--	Molecular Function: oxidoreductase activity, acting on CH-OH group of donors (GO:0016614);;	--	[V]	Defense mechanisms	D-arabinono-1,4-lactone oxidase	--	V	Defense mechanisms	gulonolactone oxidase, putative [Ricinus communis]
F01_c14831/f1p1/4080	--	--	--	--	--	--	--	--	--	--	hypothetical protein PRUPE_ppa015965mg [Prunus persica]
F01_c12109/f1p4/2490	[BK]	--	--	--	[K]	Transcription	Bromodomain	Transcription factor GTE4 GN=GTE4 OS=Arabidopsis thaliana (Mouse-ear cress) PE=2 SV=1	K	Transcription	PREDICTED: transcription factor GTE7 [Cucumis melo]
F01_c11456/f2p0/2053	--	--	--	K06689|4.41688e-07|gmx:100499891|uncharacterized LOC100499891; K06689 ubiquitin-conjugating enzyme E2 D/E [EC:6.3.2.19] (A)	[O]	Posttranslational modification, protein turnover, chaperones	--	Ubiquitin-conjugating enzyme E2 8 GN=MBK23.24 OS=Arabidopsis thaliana (Mouse-ear cress) PE=1 SV=1	O	Posttranslational modification, protein turnover, chaperones	BnaC04g10080D [Brassica napus]
F01_c15338/f1p0/1181	--	--	--	--	--	--	Cell division control protein 14, SIN component	--	S	Function unknown	PREDICTED: uncharacterized protein LOC100241859 [Vitis vinifera]
F01_c6096/f1p0/1366	--	--	--	--	--	--	Protein of unknown function (DUF1262)	--	S	Function unknown	PREDICTED: uncharacterized protein LOC100266416 [Vitis vinifera]
F01_c15432/f1p2/1169	[G]	Carbohydrate transport and metabolism	--	--	[G]	Carbohydrate transport and metabolism	Phosphoglucomutase/phosphomannomutase, alpha/beta/alpha domain II;; Phosphoglucomutase/phosphomannomutase, alpha/beta/alpha domain III	--	G	Carbohydrate transport and metabolism	PREDICTED: uncharacterized protein LOC103936642 isoform X3 [Pyrus x bretschneideri]
F01_c18550/f2p24/1303	[J]	Translation, ribosomal structure and biogenesis	Molecular Function: structural constituent of ribosome (GO:0003735);; Molecular Function: copper ion binding (GO:0005507);; Cellular Component: nucleolus (GO:0005730);; Cellular Component: plasma membrane (GO:0005886);; Biological Process: translational elongation (GO:0006414);; Biological Process: response to cold (GO:0009409);; Cellular Component: chloroplast (GO:0009507);; Biological Process: …	K02941|0|vvi:100250067|60S acidic ribosomal protein P0; K02941 large subunit ribosomal protein LP0 (A)	[J]	Translation, ribosomal structure and biogenesis	Ribosomal protein L10;; 60s Acidic ribosomal protein	60S acidic ribosomal protein P0 OS=Glycine max (Soybean) PE=1 SV=1	J	Translation, ribosomal structure and biogenesis	PREDICTED: 60S acidic ribosomal protein P0 [Vitis vinifera]
F01_c900/f31p17/3379	--	--	Molecular Function: sequence-specific DNA binding transcription factor activity (GO:0003700);; Cellular Component: nucleus (GO:0005634);; Biological Process: negative regulation of cell proliferation (GO:0008285);; Biological Process: auxin-activated signaling pathway (GO:0009734);; Biological Process: response to abscisic acid (GO:0009737);; Biological Process: positive regulation of flower deve…	--	--	--	Auxin response factor;; AUX/IAA family;; B3 DNA binding domain	Auxin response factor 2 GN=MTG10.3 OS=Arabidopsis thaliana (Mouse-ear cress) PE=1 SV=2	K	Transcription	PREDICTED: auxin response factor 2 [Vitis vinifera]
F01_c16334/f1p0/1343	[R]	General function prediction only	Molecular Function: nucleotide binding (GO:0000166);; Molecular Function: poly(U) RNA binding (GO:0008266);; Biological Process: response to cold (GO:0009409);; Cellular Component: chloroplast thylakoid membrane (GO:0009535);; Cellular Component: chloroplast stroma (GO:0009570);; Biological Process: salicylic acid biosynthetic process (GO:0009697);; Biological Process: response to abscisic acid (…	K11294|4.08513e-40|cit:102621789|ribonucleoprotein At2g37220, chloroplastic-like; K11294 nucleolin (A)	[R]	General function prediction only	RNA recognition motif. (a.k.a. RRM, RBD, or RNP domain);; RNA recognition motif (a.k.a. RRM, RBD, or RNP domain);; RNA recognition motif. (a.k.a. RRM, RBD, or RNP domain)	RNA-binding protein CP29B, chloroplastic {ECO:0000305} (Precursor) GN=F3G5.1 OS=Arabidopsis thaliana (Mouse-ear cress) PE=1 SV=1	A	RNA processing and modification	PREDICTED: ribonucleoprotein At2g37220, chloroplastic-like [Tarenaya hassleriana]
F01_c8959/f1p14/3839	--	--	Molecular Function: nucleotide binding (GO:0000166);; Molecular Function: nucleic acid binding (GO:0003676);; Molecular Function: RNA-directed RNA polymerase activity (GO:0003968);; Biological Process: response to virus (GO:0009615);; Biological Process: response to salicylic acid (GO:0009751);; Biological Process: positive regulation of posttranscriptional gene silencing (GO:0060148);;	K11699|0|pop:POPTR_0008s13550g|POPTRDRAFT_820696; RNA-directed RNA Polymerase family protein; K11699 RNA-dependent RNA polymerase [EC:2.7.7.48] (A)	[A]	RNA processing and modification	RNA dependent RNA polymerase	RNA-dependent RNA polymerase 1 GN=F10B6.19 OS=Arabidopsis thaliana (Mouse-ear cress) PE=2 SV=1	A	RNA processing and modification	PREDICTED: RNA-dependent RNA polymerase 1-like isoform X2 [Populus euphratica]
F01_c11833/f2p0/2030	[R]	General function prediction only	--	--	--	--	Ankyrin repeat	Putative E3 ubiquitin-protein ligase XBAT31 GN=XBAT31 OS=Arabidopsis thaliana (Mouse-ear cress) PE=2 SV=1	O	Posttranslational modification, protein turnover, chaperones	PREDICTED: putative E3 ubiquitin-protein ligase XBAT31 [Vitis vinifera]
F01_c14931/f1p2/1989	[HC]	--	Biological Process: ubiquinone biosynthetic process (GO:0006744);; Molecular Function: oxidoreductase activity, acting on paired donors, with incorporation or reduction of molecular oxygen, NAD(P)H as one donor, and incorporation of one atom of oxygen (GO:0016709);; Molecular Function: flavin adenine dinucleotide binding (GO:0050660);; Biological Process: oxidation-reduction process (GO:0055114);;	K06126|0|cit:102630098|ubiquinone biosynthesis monooxygenase COQ6-like; K06126 ubiquinone biosynthesis monooxygenase Coq6 [EC:1.14.13.-] (A)	[HC]	--	FAD binding domain;; Squalene epoxidase	--	H	Coenzyme transport and metabolism	PREDICTED: ubiquinone biosynthesis monooxygenase COQ6-like isoform X2 [Citrus sinensis]
F01_c1217/f7p3/1641	[GEPR]	--	Cellular Component: integral component of membrane (GO:0016021);; Molecular Function: substrate-specific transmembrane transporter activity (GO:0022891);; Biological Process: transmembrane transport (GO:0055085);;	--	[R]	General function prediction only	Sugar (and other) transporter;; Major Facilitator Superfamily	Sugar transporter ERD6-like 10 GN=At3g05160 OS=Arabidopsis thaliana (Mouse-ear cress) PE=2 SV=1	R	General function prediction only	PREDICTED: sugar transporter ERD6-like 5 isoform X2 [Vitis vinifera]
F01_c1989/f5p2/1234	--	--	Molecular Function: protein dimerization activity (GO:0046983);;	--	--	--	--	Transcription factor bHLH121 GN=MPN9.10 OS=Arabidopsis thaliana (Mouse-ear cress) PE=2 SV=1	K	Transcription	hypothetical protein PRUPE_ppa008347mg [Prunus persica]
F01_c1736/f3p1/1545	[J]	Translation, ribosomal structure and biogenesis	Molecular Function: tyrosine-tRNA ligase activity (GO:0004831);; Molecular Function: ATP binding (GO:0005524);; Biological Process: tRNA aminoacylation for protein translation (GO:0006418);;	K01866|0|vvi:100251282|tyrosine--tRNA ligase, cytoplasmic; K01866 tyrosyl-tRNA synthetase [EC:6.1.1.1] (A)	[J]	Translation, ribosomal structure and biogenesis	tRNA synthetases class I (W and Y)	--	J	Translation, ribosomal structure and biogenesis	PREDICTED: tyrosine--tRNA ligase, cytoplasmic [Vitis vinifera]
F01_c12013/f1p1/2179	--	--	--	--	--	--	Protein of unknown function (DUF1336)	Protein ENHANCED DISEASE RESISTANCE 2 GN=EDR2 OS=Arabidopsis thaliana (Mouse-ear cress) PE=2 SV=1	S	Function unknown	PREDICTED: uncharacterized protein LOC103404474 [Malus domestica]
F01_c13865/f1p1/1293	[Z]	Cytoskeleton	Molecular Function: structural constituent of cytoskeleton (GO:0005200);; Molecular Function: ATP binding (GO:0005524);; Cellular Component: cell wall (GO:0005618);; Cellular Component: nucleolus (GO:0005730);; Cellular Component: mitochondrion (GO:0005739);; Cellular Component: cytosol (GO:0005829);; Cellular Component: cytoskeleton (GO:0005856);; Cellular Component: plasma membrane (GO:0005886)…	K10355|0|tcc:TCM_001364|Actin 7 isoform 1; K10355 actin, other eukaryote (A)	[Z]	Cytoskeleton	Actin	Actin-7 GN=ACT7 OS=Arabidopsis thaliana (Mouse-ear cress) PE=1 SV=1	Z	Cytoskeleton	Actin-7 -like protein [Gossypium arboreum]
F01_c1605/f13p3/4023	[DZ]	--	Molecular Function: phospholipid binding (GO:0005543);; Cellular Component: cell cortex (GO:0005938);; Biological Process: cortical protein anchoring (GO:0032065);; Molecular Function: metal ion binding (GO:0046872);;	--	--	--	Regulator of chromosome condensation (RCC1) repeat;; Transcription factor regulating root and shoot growth via Pin3;; Regulator of chromosome condensation (RCC1) repeat;; Transcription factor BRX N-terminal domain;; FYVE zinc finger;; Meiotic cell cortex C-terminal pleckstrin homology	Ultraviolet-B receptor UVR8 GN=UVR8 OS=Arabidopsis thaliana (Mouse-ear cress) PE=1 SV=1	R	General function prediction only	Regulator of chromosome condensation (RCC1) family with FYVE zinc finger domain isoform 1 [Theobroma cacao]
F01_c11533/f1p5/3223	--	--	--	--	--	--	Weak chloroplast movement under blue light	Protein WEAK CHLOROPLAST MOVEMENT UNDER BLUE LIGHT 1 GN=WEB1 OS=Arabidopsis thaliana (Mouse-ear cress) PE=1 SV=1	S	Function unknown	hypothetical protein L484_006336 [Morus notabilis]
F01_c14759/f1p2/2520	[R]	General function prediction only	Molecular Function: adenyl nucleotide binding (GO:0030554);; Molecular Function: flavin adenine dinucleotide binding (GO:0050660);;	--	[S]	Function unknown	Domain of unknown function DUF21;; Transporter associated domain;; CBS domain	DUF21 domain-containing protein At1g55930, chloroplastic (Precursor) GN=CBSDUFCH2 OS=Arabidopsis thaliana (Mouse-ear cress) PE=2 SV=2	S	Function unknown	Magnesium and cobalt efflux protein corC, putative [Ricinus communis]
F01_c10662/f1p1/3232	[G]	Carbohydrate transport and metabolism	Molecular Function: glucosylceramidase activity (GO:0004348);; Cellular Component: plasma membrane (GO:0005886);; Biological Process: glucosylceramide catabolic process (GO:0006680);; Cellular Component: integral component of membrane (GO:0016021);;	K17108|0|vvi:100249401|non-lysosomal glucosylceramidase; K17108 non-lysosomal glucosylceramidase [EC:3.2.1.45] (A)	[G]	Carbohydrate transport and metabolism	Protein of unknown function, DUF608	--	G	Carbohydrate transport and metabolism	Non-lysosomal glucosylceramidase [Gossypium arboreum]
F01_c7190/f1p2/2202	--	--	Cellular Component: Golgi apparatus (GO:0005794);; Biological Process: carbohydrate biosynthetic process (GO:0016051);; Molecular Function: polygalacturonate 4-alpha-galacturonosyltransferase activity (GO:0047262);;	--	--	--	Glycosyl transferase family 8	Probable galacturonosyltransferase-like 9 GN=F20P5.18 OS=Arabidopsis thaliana (Mouse-ear cress) PE=2 SV=1	G	Carbohydrate transport and metabolism	hypothetical protein PRUPE_ppa006911mg [Prunus persica]
F01_c660/f1p6/962	--	--	--	--	--	--	--	--	S	Function unknown	hypothetical protein JCGZ_15383 [Jatropha curcas]
F01_c7537/f2p0/1858	--	--	Biological Process: cytokinesis (GO:0000910);; Molecular Function: triglyceride lipase activity (GO:0004806);; Biological Process: tubulin complex assembly (GO:0007021);; Cellular Component: chloroplast (GO:0009507);; Biological Process: embryo development ending in seed dormancy (GO:0009793);; Molecular Function: retinyl-palmitate esterase activity (GO:0050253);;	--	[S]	Function unknown	CAP-Gly domain;; Leucine Rich repeats (2 copies);; Leucine rich repeat;; Leucine-rich repeat;; Leucine Rich repeat	Tubulin-folding cofactor E GN=F26A9.18 OS=Arabidopsis thaliana (Mouse-ear cress) PE=2 SV=1	O	Posttranslational modification, protein turnover, chaperones	PREDICTED: tubulin-folding cofactor E isoform X1 [Nelumbo nucifera]
F01_c13981/f1p0/1248	[IQR]	--	Biological Process: metabolic process (GO:0008152);; Molecular Function: oxidoreductase activity, acting on the CH-OH group of donors, NAD or NADP as acceptor (GO:0016616);;	K15095|1.33029e-78|sot:102582452|short-chain dehydrogenase/reductase 2b-like; K15095 (+)-neomenthol dehydrogenase [EC:1.1.1.208] (A)	[Q]	Secondary metabolites biosynthesis, transport and catabolism	short chain dehydrogenase	Short-chain dehydrogenase/reductase 2b GN=F27D4.10 OS=Arabidopsis thaliana (Mouse-ear cress) PE=2 SV=1	Q	Secondary metabolites biosynthesis, transport and catabolism	PREDICTED: (+)-neomenthol dehydrogenase-like [Nicotiana sylvestris]
F01_c15639/f1p12/1287	[J]	Translation, ribosomal structure and biogenesis	Molecular Function: RNA binding (GO:0003723);; Molecular Function: structural constituent of ribosome (GO:0003735);; Cellular Component: nucleolus (GO:0005730);; Cellular Component: plasma membrane (GO:0005886);; Biological Process: translation (GO:0006412);; Cellular Component: chloroplast (GO:0009507);; Cellular Component: cytosolic ribosome (GO:0022626);;	K02987|1.74676e-160|pper:PRUPE_ppa009337mg|hypothetical protein; K02987 small subunit ribosomal protein S4e (A)	[J]	Translation, ribosomal structure and biogenesis	Ribosomal family S4e;; RS4NT (NUC023) domain;; KOW motif;; S4 domain	40S ribosomal protein S4 GN=RPS4 OS=Zea mays (Maize) PE=2 SV=1	J	Translation, ribosomal structure and biogenesis	hypothetical protein PRUPE_ppa009337mg [Prunus persica]
F01_c8226/f1p0/1336	[O]	Posttranslational modification, protein turnover, chaperones	Cellular Component: chloroplast (GO:0009507);;	--	[R]	General function prediction only	--	--	R	General function prediction only	PREDICTED: spermatogenesis-associated protein 20 isoform X1 [Tarenaya hassleriana]
F01_c922/f39p19/2497	[O]	Posttranslational modification, protein turnover, chaperones	Molecular Function: ATP binding (GO:0005524);; Cellular Component: cell wall (GO:0005618);; Cellular Component: cytosol (GO:0005829);; Cellular Component: plasma membrane (GO:0005886);; Biological Process: protein folding (GO:0006457);; Biological Process: response to heat (GO:0009408);; Biological Process: response to high light intensity (GO:0009644);; Biological Process: defense response to ba…	K04079|0|cmo:103484110|heat shock protein 83; K04079 molecular chaperone HtpG (A)	[O]	Posttranslational modification, protein turnover, chaperones	Hsp90 protein;; Histidine kinase-, DNA gyrase B-, and HSP90-like ATPase;; Histidine kinase-, DNA gyrase B-, and HSP90-like ATPase	Heat shock protein 83 GN=HSP83A OS=Ipomoea nil (Japanese morning glory) PE=2 SV=1	O	Posttranslational modification, protein turnover, chaperones	PREDICTED: heat shock protein 83 [Cucumis melo]
F01_c13634/f1p2/2026	--	--	--	K16189|0|fve:101293112|transcription factor PIF5-like; K16189 phytochrome-interacting factor 4 (A)	--	--	Helix-loop-helix DNA-binding domain	Transcription factor PIF1 GN=T2G17.2 OS=Arabidopsis thaliana (Mouse-ear cress) PE=1 SV=1	K	Transcription	PREDICTED: transcription factor PIF5-like [Fragaria vesca subsp. vesca]
F01_c11200/f1p0/4060	--	--	Molecular Function: phospholipid binding (GO:0005543);; Cellular Component: vacuole (GO:0005773);; Cellular Component: Golgi apparatus (GO:0005794);; Biological Process: cell adhesion (GO:0007155);; Cellular Component: plasmodesma (GO:0009506);; Biological Process: trichome morphogenesis (GO:0010090);; Biological Process: actin nucleation (GO:0045010);; Biological Process: root hair cell differen…	--	[U]	Intracellular trafficking, secretion, and vesicular transport	Plant protein of unknown function (DUF946)	--	U	Intracellular trafficking, secretion, and vesicular transport	PREDICTED: uncharacterized protein LOC100260794 [Vitis vinifera]
F01_c1170/f8p2/1400	--	--	Cellular Component: membrane (GO:0016020);; Cellular Component: intracellular membrane-bounded organelle (GO:0043231);; Cellular Component: cytoplasmic part (GO:0044444);;	--	--	--	SMP-30/Gluconolaconase/LRE-like region	--	S	Function unknown	PREDICTED: uncharacterized protein LOC102629240 [Citrus sinensis]
F01_c2825/f2p3/2230	[Z]	Cytoskeleton	Molecular Function: actin binding (GO:0003779);; Molecular Function: structural constituent of cytoskeleton (GO:0005200);; Molecular Function: ATP binding (GO:0005524);; Cellular Component: cytosol (GO:0005829);; Cellular Component: Arp2/3 protein complex (GO:0005885);; Biological Process: multidimensional cell growth (GO:0009825);; Biological Process: trichome morphogenesis (GO:0010090);; Biolog…	K18584|0|vvi:100259418|actin-related protein 3; K18584 actin-related protein 3 (A)	[Z]	Cytoskeleton	Actin	Actin-related protein 3 GN=F3F19.20 OS=Arabidopsis thaliana (Mouse-ear cress) PE=1 SV=1	Z	Cytoskeleton	Actin-related protein 3 [Morus notabilis]
F01_c12308/f1p0/2731	[L]	Replication, recombination and repair	Molecular Function: RNA binding (GO:0003723);; Molecular Function: ATP binding (GO:0005524);; Molecular Function: ATP-dependent helicase activity (GO:0008026);;	K12818|0|rcu:RCOM_1602810|ATP-dependent RNA helicase, putative; K12818 ATP-dependent RNA helicase DHX8/PRP22 [EC:3.6.4.13] (A)	[A]	RNA processing and modification	Oligonucleotide/oligosaccharide-binding (OB)-fold;; Helicase associated domain (HA2)	Probable pre-mRNA-splicing factor ATP-dependent RNA helicase GN=At3g26560 OS=Arabidopsis thaliana (Mouse-ear cress) PE=1 SV=2	A	RNA processing and modification	ATP-dependent RNA helicase, putative [Ricinus communis]
F01_c8351/f1p1/2433	--	--	--	K18835|0|vvi:100261730|probable WRKY transcription factor 2; K18835 WRKY transcription factor 2 (A)	--	--	WRKY DNA -binding domain	Probable WRKY transcription factor 2 GN=WRKY2 OS=Arabidopsis thaliana (Mouse-ear cress) PE=2 SV=1	K	Transcription	PREDICTED: probable WRKY transcription factor 2 [Vitis vinifera]
F01_c17129/f1p8/3504	[L]	Replication, recombination and repair	Molecular Function: RNA helicase activity (GO:0003724);; Molecular Function: protein binding (GO:0005515);; Molecular Function: ATP binding (GO:0005524);; Cellular Component: cytoplasm (GO:0005737);; Biological Process: virus induced gene silencing (GO:0009616);; Biological Process: posttranscriptional gene silencing by RNA (GO:0035194);;	K18422|0|cic:CICLE_v10004283mg|hypothetical protein; K18422 helicase MOV-10 [EC:3.6.4.13] (A)	[A]	RNA processing and modification	AAA domain;; AAA domain;; AAA domain;; Part of AAA domain;; AAA domain;; Viral (Superfamily 1) RNA helicase;; UvrD/REP helicase N-terminal domain;; Type III restriction enzyme, res subunit;; PhoH-like protein	Probable RNA helicase SDE3 GN=SDE3 OS=Arabidopsis thaliana (Mouse-ear cress) PE=1 SV=1	A	RNA processing and modification	hypothetical protein CICLE_v10004283mg [Citrus clementina]
F01_c6992/f1p7/1441	[Z]	Cytoskeleton	Molecular Function: GTPase activity (GO:0003924);; Molecular Function: structural constituent of cytoskeleton (GO:0005200);; Molecular Function: GTP binding (GO:0005525);; Cellular Component: cytoplasm (GO:0005737);; Cellular Component: microtubule (GO:0005874);; Biological Process: GTP catabolic process (GO:0006184);; Biological Process: microtubule-based movement (GO:0007018);; Biological Proce…	K07375|0|mus:103987295|tubulin beta-1 chain-like; K07375 tubulin beta (A)	[Z]	Cytoskeleton	Tubulin/FtsZ family, GTPase domain;; Tubulin C-terminal domain	Tubulin beta-2 chain GN=TUBB2 OS=Eleusine indica (Goosegrass) PE=2 SV=1	Z	Cytoskeleton	PREDICTED: tubulin beta-1 chain-like [Musa acuminata subsp. malaccensis]
F01_c7317/f1p2/2344	--	--	Molecular Function: DNA binding (GO:0003677);; Biological Process: DNA methylation (GO:0006306);; Molecular Function: methyltransferase activity (GO:0008168);;	--	[R]	General function prediction only	DYW family of nucleic acid deaminases	Pentatricopeptide repeat-containing protein At2g25580 GN=PCMP-H75 OS=Arabidopsis thaliana (Mouse-ear cress) PE=2 SV=2	R	General function prediction only	hypothetical protein CICLE_v10007521mg [Citrus clementina]
F01_c7492/f2p0/2479	--	--	--	K13963|1.14186e-15|rcu:RCOM_0790520|Protein Z, putative; K13963 serpin B (A)	--	--	--	Serpin-Z4 GN=PAZ1 OS=Hordeum vulgare (Barley) PE=1 SV=2	V	Defense mechanisms	Protein Z, putative [Ricinus communis]
F01_c8920/f1p2/2127	[RTKL]	--	Molecular Function: protein tyrosine kinase activity (GO:0004713);; Molecular Function: ATP binding (GO:0005524);; Biological Process: protein phosphorylation (GO:0006468);;	--	[T]	Signal transduction mechanisms	--	Probable serine/threonine-protein kinase At1g18390 (Precursor) GN=At1g18390 OS=Arabidopsis thaliana (Mouse-ear cress) PE=2 SV=2	T	Signal transduction mechanisms	hypothetical protein PRUPE_ppa002671mg [Prunus persica]
F01_c5949/f1p2/3309	[G]	Carbohydrate transport and metabolism	--	K00705|0|pmum:103342251|4-alpha-glucanotransferase DPE2; K00705 4-alpha-glucanotransferase [EC:2.4.1.25] (A)	--	--	4-alpha-glucanotransferase	4-alpha-glucanotransferase DPE2 GN=DPE2 OS=Arabidopsis thaliana (Mouse-ear cress) PE=1 SV=1	G	Carbohydrate transport and metabolism	PREDICTED: 4-alpha-glucanotransferase DPE2 [Prunus mume]
F01_c14016/f1p0/2308	--	--	--	--	--	--	--	--	S	Function unknown	conserved hypothetical protein [Pyrenophora tritici-repentis Pt-1C-BFP]
F01_c4656/f2p11/2293	[P]	Inorganic ion transport and metabolism	Molecular Function: magnesium ion binding (GO:0000287);; Molecular Function: phospholipid-translocating ATPase activity (GO:0004012);; Molecular Function: ATP binding (GO:0005524);; Biological Process: cation transport (GO:0006812);; Biological Process: phospholipid transport (GO:0015914);; Cellular Component: integral component of membrane (GO:0016021);; Molecular Function: cation-transporting A…	K01530|0|vvi:100249823|putative phospholipid-transporting ATPase 4; K01530 phospholipid-translocating ATPase [EC:3.6.3.1] (A)	[R]	General function prediction only	Putative hydrolase of sodium-potassium ATPase alpha subunit;; haloacid dehalogenase-like hydrolase;; haloacid dehalogenase-like hydrolase	Putative phospholipid-transporting ATPase 4 GN=ALA4 OS=Arabidopsis thaliana (Mouse-ear cress) PE=3 SV=2	P	Inorganic ion transport and metabolism	unnamed protein product [Coffea canephora]
F01_c12050/f1p0/2402	--	--	--	K02738|1.43543e-07|tcc:TCM_036772|N-terminal nucleophile aminohydrolases (Ntn hydrolases) superfamily protein isoform 1; K02738 20S proteasome subunit beta 1 [EC:3.4.25.1] (A)	[O]	Posttranslational modification, protein turnover, chaperones	--	Proteasome subunit beta type-6 (Precursor) GN=F8F16.120 OS=Arabidopsis thaliana (Mouse-ear cress) PE=1 SV=2	O	Posttranslational modification, protein turnover, chaperones	Proteasome subunit beta type-6 -like protein [Gossypium arboreum]
F01_c5278/f1p0/4280	--	--	Molecular Function: binding (GO:0005488);;	--	--	--	Protein of unknown function (DUF 659)	--	R	General function prediction only	PREDICTED: uncharacterized protein LOC104879161 [Vitis vinifera]
F01_c2868/f4p7/3543	--	--	--	--	--	--	--	--	S	Function unknown	PREDICTED: uncharacterized protein LOC100247144 [Vitis vinifera]
F01_c3526/f1p1/4369	[RTKL]	--	Molecular Function: nucleotide binding (GO:0000166);; Molecular Function: protein kinase activity (GO:0004672);; Biological Process: phosphorylation (GO:0016310);;	K16196|0|pmum:103322420|probable serine/threonine-protein kinase GCN2; K16196 eukaryotic translation initiation factor 2-alpha kinase 4 [EC:2.7.11.1] (A)	[J]	Translation, ribosomal structure and biogenesis	Anticodon binding domain of tRNAs;; Anticodon binding domain	Probable serine/threonine-protein kinase GCN2 GN=GCN2 OS=Arabidopsis thaliana (Mouse-ear cress) PE=2 SV=2	T	Signal transduction mechanisms	PREDICTED: probable serine/threonine-protein kinase GCN2 [Prunus mume]
F01_c13441/f1p0/1060	--	--	Cellular Component: vacuole (GO:0005773);;	--	--	--	BRO1-like domain	--	R	General function prediction only	PREDICTED: BRO1 domain-containing protein BROX homolog isoform X1 [Vitis vinifera]
F01_c17001/f1p1/1002	--	--	Biological Process: protein targeting to vacuole (GO:0006623);; Molecular Function: zinc ion binding (GO:0008270);; Biological Process: vesicle-mediated transport (GO:0016192);;	--	--	--	TRAF-type zinc finger	--	S	Function unknown	PREDICTED: XIAP-associated factor 1 [Pyrus x bretschneideri]
F01_c17212/f1p14/1677	--	--	Molecular Function: DNA binding (GO:0003677);; Cellular Component: nucleus (GO:0005634);; Biological Process: regulation of transcription, DNA-templated (GO:0006355);; Biological Process: auxin-activated signaling pathway (GO:0009734);; Molecular Function: protein dimerization activity (GO:0046983);;	--	--	--	AUX/IAA family	Auxin response factor 6 GN=ARF6 OS=Arabidopsis thaliana (Mouse-ear cress) PE=1 SV=2	K	Transcription	PREDICTED: auxin response factor 6 [Vitis vinifera]
F01_c4246/f2p20/1214	[G]	Carbohydrate transport and metabolism	Molecular Function: glucokinase activity (GO:0004340);; Molecular Function: ATP binding (GO:0005524);; Cellular Component: nucleus (GO:0005634);; Cellular Component: mitochondrion (GO:0005739);; Cellular Component: vacuole (GO:0005773);; Cellular Component: plasma membrane (GO:0005886);; Biological Process: glycolytic process (GO:0006096);; Molecular Function: zinc ion binding (GO:0008270);; Mole…	K00844|1.53702e-155|pop:POPTR_0018s09560g|POPTRDRAFT_825877; Hexokinase 1 family protein; K00844 hexokinase [EC:2.7.1.1] (A)	[G]	Carbohydrate transport and metabolism	Hexokinase	Hexokinase-2 GN=HXK2 OS=Arabidopsis thaliana (Mouse-ear cress) PE=1 SV=1	G	Carbohydrate transport and metabolism	hypothetical protein CISIN_1g010895mg [Citrus sinensis]
F01_c4319/f2p2/3325	--	--	--	--	--	--	--	Protein MODIFIER OF SNC1 1 GN=MOS1 OS=Arabidopsis thaliana (Mouse-ear cress) PE=1 SV=2	S	Function unknown	hypothetical protein VITISV_039514 [Vitis vinifera]
F01_c22401/f2p2/3122	[C]	Energy production and conversion	Cellular Component: cytosol (GO:0005829);; Biological Process: tricarboxylic acid cycle (GO:0006099);; Molecular Function: phosphoenolpyruvate carboxylase activity (GO:0008964);; Biological Process: carbon fixation (GO:0015977);; Molecular Function: 2-alkenal reductase [NAD(P)] activity (GO:0032440);; Cellular Component: apoplast (GO:0048046);;	K01595|0|atr:s00021p00059810|AMTR_s00021p00059810; hypothetical protein; K01595 phosphoenolpyruvate carboxylase [EC:4.1.1.31] (A)	--	--	Phosphoenolpyruvate carboxylase	Phosphoenolpyruvate carboxylase, housekeeping isozyme OS=Saccharum hybrid (Sugarcane) PE=3 SV=1	C	Energy production and conversion	hypothetical protein AMTR_s00021p00059810 [Amborella trichopoda]
F01_c7245/f1p9/2334	[J]	Translation, ribosomal structure and biogenesis	Molecular Function: translation elongation factor activity (GO:0003746);; Biological Process: translational elongation (GO:0006414);; Cellular Component: chloroplast stroma (GO:0009570);; Biological Process: embryo development ending in seed dormancy (GO:0009793);; Biological Process: chloroplast relocation (GO:0009902);; Cellular Component: chloroplast envelope (GO:0009941);; Biological Process:…	K02357|0|pmum:103340883|uncharacterized LOC103340883; K02357 elongation factor Ts (A)	[J]	Translation, ribosomal structure and biogenesis	Elongation factor TS;; UBA/TS-N domain	Elongation factor Ts, chloroplastic GN=tsf OS=Rhodomonas salina (Cryptomonas salina) PE=3 SV=1	J	Translation, ribosomal structure and biogenesis	PREDICTED: uncharacterized protein LOC103340883 [Prunus mume]
F01_c7714/f2p1/2385	--	--	Molecular Function: nucleic acid binding (GO:0003676);; Molecular Function: protein dimerization activity (GO:0046983);;	--	--	--	Protein of unknown function (DUF 659)	--	S	Function unknown	PREDICTED: uncharacterized protein LOC100854857 [Vitis vinifera]
F01_c5774/f1p0/1077	[IQR]	--	Molecular Function: oxidoreductase activity (GO:0016491);; Biological Process: single-organism metabolic process (GO:0044710);;	--	[R]	General function prediction only	short chain dehydrogenase;; KR domain;; Enoyl-(Acyl carrier protein) reductase	Short-chain dehydrogenase reductase 3b GN=F14M4 OS=Arabidopsis thaliana (Mouse-ear cress) PE=2 SV=1	Q	Secondary metabolites biosynthesis, transport and catabolism	PREDICTED: (-)-isopiperitenol/(-)-carveol dehydrogenase, mitochondrial [Vitis vinifera]
F01_c1839/f3p4/1567	--	--	--	--	[R]	General function prediction only	Galactose oxidase, central domain;; Kelch motif;; Kelch motif;; Galactose oxidase, central domain;; Kelch motif	F-box/kelch-repeat protein SKIP20 GN=SKIP20 OS=Arabidopsis thaliana (Mouse-ear cress) PE=1 SV=1	R	General function prediction only	PREDICTED: F-box/kelch-repeat protein SKIP20-like [Vitis vinifera]
F01_c6626/f1p4/2201	--	--	Cellular Component: cell part (GO:0044464);;	--	--	--	Protein of unknown function (DUF4005)	Protein IQ-DOMAIN 31 GN=IQD31 OS=Arabidopsis thaliana (Mouse-ear cress) PE=1 SV=1	S	Function unknown	PREDICTED: protein IQ-DOMAIN 31 [Vitis vinifera]
F01_c7670/f1p1/1046	[O]	Posttranslational modification, protein turnover, chaperones	Molecular Function: catalytic activity (GO:0003824);;	K00799|9.21974e-62|vvi:100264717|probable glutathione S-transferase; K00799 glutathione S-transferase [EC:2.5.1.18] (A)	[O]	Posttranslational modification, protein turnover, chaperones	Glutathione S-transferase, N-terminal domain;; Glutathione S-transferase, C-terminal domain;; Glutathione S-transferase, N-terminal domain;; Glutathione S-transferase, N-terminal domain;; Glutathione S-transferase, C-terminal domain	Glutathione transferase GST 23 OS=Zea mays (Maize) PE=2 SV=1	O	Posttranslational modification, protein turnover, chaperones	PREDICTED: probable glutathione S-transferase [Nelumbo nucifera]
F01_c17152/f1p3/4172	--	--	--	--	[R]	General function prediction only	--	--	R	General function prediction only	PREDICTED: WD repeat-containing protein 11-like isoform X2 [Pyrus x bretschneideri]
F01_c2197/f2p0/1157	--	--	Molecular Function: nucleic acid binding (GO:0003676);; Biological Process: protein folding (GO:0006457);; Molecular Function: zinc ion binding (GO:0008270);; Biological Process: response to heat (GO:0009408);; Biological Process: response to high light intensity (GO:0009644);; Biological Process: response to endoplasmic reticulum stress (GO:0034976);; Biological Process: response to hydrogen per…	K09250|3.26683e-86|vvi:100241979|zinc finger protein GIS2; K09250 cellular nucleic acid-binding protein (A)	[O]	Posttranslational modification, protein turnover, chaperones	Zinc knuckle;; Zinc knuckle	Cold shock protein 1 GN=T19K4.150 OS=Arabidopsis thaliana (Mouse-ear cress) PE=1 SV=1	O	Posttranslational modification, protein turnover, chaperones	PREDICTED: zinc finger protein GIS2 [Vitis vinifera]
F01_c7909/f1p0/1398	--	--	Cellular Component: nucleus (GO:0005634);;	K11339|0|tcc:TCM_000700|MRG family protein isoform 1; K11339 mortality factor 4-like protein 1 (A)	[BK]	--	MRG;; RNA binding activity-knot of a chromodomain	--	1311	Mortality factor 4-like protein 1	MRG family protein isoform 1 [Theobroma cacao]
F01_c5103/f1p0/3687	[EH]	--	Biological Process: metabolic process (GO:0008152);;	K13950|1.70694e-81|zma:103629593|putative aminodeoxychorismate synthase; K13950 para-aminobenzoate synthetase [EC:2.6.1.85] (A)	[J]	Translation, ribosomal structure and biogenesis	chorismate binding enzyme	Probable aminodeoxychorismate synthase, chloroplastic (Precursor) GN=P0468G03.14 OS=Oryza sativa subsp. japonica (Rice) PE=2 SV=1	J	Translation, ribosomal structure and biogenesis	para-aminobenzoate/anthranilate synthase glutamine amidotransferase protein, putative [Rhizoctonia solani AG-3 Rhs1AP]
F01_c17533/f1p1/4152	--	--	Molecular Function: DNA binding (GO:0003677);; Molecular Function: DNA-directed DNA polymerase activity (GO:0003887);; Biological Process: transcription, DNA-templated (GO:0006351);;	K02331|0|vvi:100268096|DNA polymerase V; K02331 DNA polymerase phi [EC:2.7.7.7] (A)	[K]	Transcription	DNA polymerase phi	--	K	Transcription	PREDICTED: DNA polymerase V [Vitis vinifera]
F01_c14433/f1p1/1467	--	--	Molecular Function: DNA binding (GO:0003677);; Biological Process: regulation of transcription, DNA-templated (GO:0006355);;	--	--	--	No apical meristem (NAM) protein	NAC domain-containing protein 100 GN=NAC100 OS=Arabidopsis thaliana (Mouse-ear cress) PE=2 SV=1	S	Function unknown	NAC transcription factor 002 [Jatropha curcas]
F01_c8649/f1p0/1626	--	--	Molecular Function: binding (GO:0005488);;	--	--	--	Zinc finger C-x8-C-x5-C-x3-H type (and similar)	Zinc finger CCCH domain-containing protein 13 OS=Oryza sativa subsp. japonica (Rice) PE=2 SV=1	R	General function prediction only	PREDICTED: zinc finger CCCH domain-containing protein 13 isoform X1 [Vitis vinifera]
F01_c5246/f2p2/2056	--	--	Molecular Function: transporter activity (GO:0005215);; Cellular Component: intracellular (GO:0005622);; Biological Process: transport (GO:0006810);; Cellular Component: integral component of membrane (GO:0016021);;	--	[I]	Lipid transport and metabolism	CRAL/TRIO domain;; CRAL/TRIO, N-terminal domain;; Divergent CRAL/TRIO domain	Patellin-3 GN=PATL3 OS=Arabidopsis thaliana (Mouse-ear cress) PE=1 SV=2	I	Lipid transport and metabolism	Patellin-5, putative [Ricinus communis]
F01_c461/f1p1/793	--	--	Biological Process: regulation of transcription, DNA-templated (GO:0006355);; Molecular Function: zinc ion binding (GO:0008270);; Molecular Function: histone binding (GO:0042393);;	--	[R]	General function prediction only	Domain of unknown function (DUF3594);; PHD-finger	PHD finger protein ALFIN-LIKE 1 GN=AL1 OS=Arabidopsis thaliana (Mouse-ear cress) PE=1 SV=1	K	Transcription	phd/F-box containing protein, putative [Ricinus communis]
F01_c13580/f2p6/2050	--	--	Cellular Component: endosome (GO:0005768);; Cellular Component: Golgi apparatus (GO:0005794);; Cellular Component: trans-Golgi network (GO:0005802);; Molecular Function: methyltransferase activity (GO:0008168);; Biological Process: response to desiccation (GO:0009269);; Biological Process: response to cold (GO:0009409);; Biological Process: response to salt stress (GO:0009651);; Biological Proces…	--	--	--	Putative S-adenosyl-L-methionine-dependent methyltransferase	Probable methyltransferase PMT21 GN=ERD3 OS=Arabidopsis thaliana (Mouse-ear cress) PE=2 SV=1	R	General function prediction only	PREDICTED: probable methyltransferase PMT20 [Vitis vinifera]
F01_c15574/f1p0/1936	[S]	Function unknown	Biological Process: signal transduction (GO:0007165);; Molecular Function: zinc ion binding (GO:0008270);; Molecular Function: phosphatidylinositol binding (GO:0035091);;	--	[S]	Function unknown	Family of unknown function (DUF500);; FYVE zinc finger	--	R	General function prediction only	PREDICTED: uncharacterized protein LOC100241291 isoform X2 [Vitis vinifera]
F01_c6157/f1p1/1081	--	--	Molecular Function: transferase activity, transferring acyl groups other than amino-acyl groups (GO:0016747);;	--	--	--	Transferase family	BAHD acyltransferase DCR GN=MRO11.2 OS=Arabidopsis thaliana (Mouse-ear cress) PE=2 SV=1	S	Function unknown	hypothetical protein PRUPE_ppa005318mg [Prunus persica]
F01_c18851/f11p7/1777	[J]	Translation, ribosomal structure and biogenesis	Molecular Function: translation elongation factor activity (GO:0003746);; Molecular Function: GTPase activity (GO:0003924);; Molecular Function: GTP binding (GO:0005525);; Cellular Component: cytoplasm (GO:0005737);; Biological Process: GTP catabolic process (GO:0006184);; Biological Process: translational elongation (GO:0006414);;	K03231|0|gmx:100785429|elongation factor 1-alpha-like; K03231 elongation factor 1-alpha (A)	[J]	Translation, ribosomal structure and biogenesis	Elongation factor Tu GTP binding domain;; Elongation factor Tu C-terminal domain;; Elongation factor Tu domain 2;; 50S ribosome-binding GTPase	Elongation factor 1-alpha 4 GN=A4 OS=Arabidopsis thaliana (Mouse-ear cress) PE=1 SV=2	J	Translation, ribosomal structure and biogenesis	Elongation factor 1-alpha [Glycine soja]
F01_c11303/f7p2/3419	--	--	Molecular Function: protein serine/threonine kinase activity (GO:0004674);; Molecular Function: ATP binding (GO:0005524);; Biological Process: protein phosphorylation (GO:0006468);; Biological Process: transmembrane receptor protein tyrosine kinase signaling pathway (GO:0007169);; Biological Process: anthocyanin-containing compound biosynthetic process (GO:0009718);; Biological Process: response …	--	--	--	Leucine Rich repeats (2 copies);; Leucine rich repeat;; Leucine Rich Repeat	Probable inactive leucine-rich repeat receptor-like protein kinase At3g03770 (Precursor) GN=At3g03770 OS=Arabidopsis thaliana (Mouse-ear cress) PE=2 SV=1	T	Signal transduction mechanisms	PREDICTED: probable inactive leucine-rich repeat receptor-like protein kinase At3g03770 [Vitis vinifera]
F01_c5836/f1p0/3542	[RTKL]	--	Molecular Function: protein kinase activity (GO:0004672);;	--	--	--	Leucine Rich repeats (2 copies);; Leucine Rich Repeat;; Leucine rich repeat;; Leucine Rich repeat;; Leucine rich repeat	Leucine-rich repeat receptor-like protein kinase PEPR1 (Precursor) GN=PEPR1 OS=Arabidopsis thaliana (Mouse-ear cress) PE=1 SV=1	T	Signal transduction mechanisms	LRR receptor-like serine/threonine-protein kinase GSO1 [Gossypium arboreum]
F01_c12116/f2p86/1981	[R]	General function prediction only	Molecular Function: structural molecule activity (GO:0005198);; Cellular Component: plasma membrane (GO:0005886);; Biological Process: intracellular protein transport (GO:0006886);; Biological Process: vesicle-mediated transport (GO:0016192);; Molecular Function: myosin heavy chain kinase activity (GO:0016905);; Cellular Component: COPI vesicle coat (GO:0030126);;	K05236|0|pop:POPTR_0015s08110g|POPTRDRAFT_575095; coatomer alpha subunit-like family protein; K05236 coatomer protein complex, subunit alpha (xenin) (A)	[U]	Intracellular trafficking, secretion, and vesicular transport	Coatomer (COPI) alpha subunit C-terminus;; Coatomer WD associated region	Coatomer subunit alpha-1 GN=At1g62020 OS=Arabidopsis thaliana (Mouse-ear cress) PE=2 SV=2	U	Intracellular trafficking, secretion, and vesicular transport	hypothetical protein JCGZ_26756 [Jatropha curcas]
F01_c16550/f1p1/1080	--	--	--	--	[R]	General function prediction only	--	--	S	Function unknown	PREDICTED: uncharacterized protein LOC104610629 isoform X1 [Nelumbo nucifera]
F01_c2439/f2p2/2484	--	--	Biological Process: cell communication (GO:0007154);; Molecular Function: phosphatidylinositol binding (GO:0035091);;	--	--	--	PX domain	--	R	General function prediction only	PREDICTED: uncharacterized protein LOC101307855 [Fragaria vesca subsp. vesca]
F01_c13814/f1p8/2372	--	--	Molecular Function: GTPase activator activity (GO:0005096);; Molecular Function: phospholipid binding (GO:0005543);; Cellular Component: intracellular (GO:0005622);; Biological Process: signal transduction (GO:0007165);; Biological Process: positive regulation of GTPase activity (GO:0043547);;	--	[T]	Signal transduction mechanisms	Leucine-zipper of ternary complex factor MIP1	Rho GTPase-activating protein 7 GN=ROPGAP7 OS=Arabidopsis thaliana (Mouse-ear cress) PE=2 SV=1	T	Signal transduction mechanisms	hypothetical protein CISIN_1g0028191mg, partial [Citrus sinensis]
F01_c15125/f1p0/2008	[Q]	Secondary metabolites biosynthesis, transport and catabolism	Biological Process: metabolic process (GO:0008152);; Molecular Function: oxidoreductase activity (GO:0016491);; Molecular Function: metal ion binding (GO:0046872);;	K11868|1.30678e-15|aly:ARALYDRAFT_481994|CYP71A13; K11868 indoleacetaldoxime dehydratase [EC:4.99.1.6] (A)	[Q]	Secondary metabolites biosynthesis, transport and catabolism	Cytochrome P450	Indoleacetaldoxime dehydratase GN=CYP71A13 OS=Arabidopsis thaliana (Mouse-ear cress) PE=1 SV=1	Q	Secondary metabolites biosynthesis, transport and catabolism	hypothetical protein COCMIDRAFT_89144 [Bipolaris oryzae ATCC 44560]
F01_c2918/f2p1/4057	--	--	--	K14794|0|cic:CICLE_v10023308mg|hypothetical protein; K14794 ribosomal RNA-processing protein 12 (A)	[S]	Function unknown	NUC173 domain	--	S	Function unknown	hypothetical protein CICLE_v10023308mg [Citrus clementina]
F01_c2551/f2p3/3476	--	--	--	--	[K]	Transcription	PHD-finger;; Ring finger domain;; Zinc finger, C3HC4 type (RING finger);; Zinc finger, C3HC4 type (RING finger)	--	K	Transcription	PREDICTED: autophagy-related protein 36 [Vitis vinifera]
F01_c3421/f1p2/1689	--	--	Cellular Component: ubiquitin ligase complex (GO:0000151);; Molecular Function: ubiquitin-protein transferase activity (GO:0004842);; Biological Process: protein ubiquitination (GO:0016567);;	--	--	--	U-box domain	U-box domain-containing protein 25 GN=PUB25 OS=Arabidopsis thaliana (Mouse-ear cress) PE=2 SV=1	O	Posttranslational modification, protein turnover, chaperones	U-box domain-containing protein 26 [Morus notabilis]
F01_c17784/f1p3/1980	--	--	--	--	[S]	Function unknown	Uncharacterised conserved protein (DUF2359)	--	S	Function unknown	conserved hypothetical protein [Ricinus communis]
F01_c15631/f1p2/2099	[O]	Posttranslational modification, protein turnover, chaperones	Molecular Function: ATP binding (GO:0005524);; Cellular Component: cell wall (GO:0005618);; Cellular Component: nuclear envelope (GO:0005635);; Cellular Component: nucleolus (GO:0005730);; Cellular Component: spindle (GO:0005819);; Cellular Component: plasma membrane (GO:0005886);; Cellular Component: phragmoplast (GO:0009524);; Biological Process: pollen germination (GO:0009846);; Biological Pro…	K13525|0|pop:POPTR_0012s09000g|POPTRDRAFT_570155; hypothetical protein; K13525 transitional endoplasmic reticulum ATPase (A)	[O]	Posttranslational modification, protein turnover, chaperones	ATPase family associated with various cellular activities (AAA);; AAA domain (Cdc48 subfamily)	Cell division cycle protein 48 homolog GN=CDC48 OS=Glycine max (Soybean) PE=1 SV=1	O	Posttranslational modification, protein turnover, chaperones	hypothetical protein JCGZ_11436 [Jatropha curcas]
F01_c5919/f2p3/1303	[R]	General function prediction only	--	--	--	--	Alpha/beta hydrolase family;; alpha/beta hydrolase fold;; Alpha/beta hydrolase family	--	R	General function prediction only	PREDICTED: uncharacterized protein LOC100263058 [Vitis vinifera]
F01_c3059/f2p4/2421	--	--	Molecular Function: zinc ion binding (GO:0008270);;	--	--	--	FAR1 DNA-binding domain	Protein FAR1-RELATED SEQUENCE 11 GN=FRS11 OS=Arabidopsis thaliana (Mouse-ear cress) PE=2 SV=1	S	Function unknown	hypothetical protein JCGZ_00282 [Jatropha curcas]
F01_c8575/f1p1/1550	[J]	Translation, ribosomal structure and biogenesis	Molecular Function: tyrosine-tRNA ligase activity (GO:0004831);; Molecular Function: ATP binding (GO:0005524);; Biological Process: tRNA aminoacylation for protein translation (GO:0006418);;	K01866|7.5984e-179|vvi:100251282|tyrosine--tRNA ligase, cytoplasmic; K01866 tyrosyl-tRNA synthetase [EC:6.1.1.1] (A)	[J]	Translation, ribosomal structure and biogenesis	tRNA synthetases class I (W and Y)	--	J	Translation, ribosomal structure and biogenesis	PREDICTED: tyrosine--tRNA ligase, cytoplasmic [Vitis vinifera]
F01_c8342/f2p2/2169	--	--	Molecular Function: DNA binding (GO:0003677);; Cellular Component: nucleus (GO:0005634);;	--	[S]	Function unknown	IQ calmodulin-binding motif;; Ankyrin repeats (many copies);; Ankyrin repeat;; Ankyrin repeats (3 copies);; Ankyrin repeat	Calmodulin-binding transcription activator 5 OS=Arabidopsis thaliana (Mouse-ear cress) PE=2 SV=2	K	Transcription	PREDICTED: calmodulin-binding transcription activator 6 isoform X1 [Vitis vinifera]
F01_c8696/f1p2/2776	[R]	General function prediction only	Biological Process: regulation of Rab GTPase activity (GO:0032313);;	--	[T]	Signal transduction mechanisms	Rab-GTPase-TBC domain	--	T	Signal transduction mechanisms	PREDICTED: small G protein signaling modulator 1-like [Vitis vinifera]
F01_c410/f2p0/955	[J]	Translation, ribosomal structure and biogenesis	Molecular Function: translation elongation factor activity (GO:0003746);; Molecular Function: GTPase activity (GO:0003924);; Molecular Function: GTP binding (GO:0005525);; Cellular Component: intracellular (GO:0005622);; Biological Process: GTP catabolic process (GO:0006184);; Biological Process: translational elongation (GO:0006414);; Molecular Function: nucleotidyltransferase activity (GO:00167…	K02358|2.64837e-141|rcu:RCOM_0648170|elongation factor tu, putative (EC:2.7.7.4); K02358 elongation factor Tu (A)	[J]	Translation, ribosomal structure and biogenesis	Elongation factor Tu C-terminal domain;; Elongation factor Tu domain 2	Elongation factor Tu, mitochondrial (Precursor) GN=TUFA OS=Arabidopsis thaliana (Mouse-ear cress) PE=1 SV=1	J	Translation, ribosomal structure and biogenesis	elongation factor tu, putative [Ricinus communis]
F01_c9606/f1p4/2187	--	--	--	--	--	--	Protein of unknown function (DUF 659);; hAT family C-terminal dimerisation region;; BED zinc finger	--	S	Function unknown	PREDICTED: uncharacterized protein LOC100264734 isoform X1 [Vitis vinifera]
F01_c11127/f9p5/3500	[C]	Energy production and conversion	Biological Process: tricarboxylic acid cycle (GO:0006099);; Molecular Function: phosphoenolpyruvate carboxylase activity (GO:0008964);; Biological Process: carbon fixation (GO:0015977);;	K01595|0|tcc:TCM_011892|Phosphoenolpyruvate carboxylase 4 isoform 1; K01595 phosphoenolpyruvate carboxylase [EC:4.1.1.31] (A)	--	--	Phosphoenolpyruvate carboxylase	Phosphoenolpyruvate carboxylase 4 GN=PPC4 OS=Arabidopsis thaliana (Mouse-ear cress) PE=2 SV=1	C	Energy production and conversion	Phosphoenolpyruvate carboxylase 4 isoform 1 [Theobroma cacao]
F01_c7986/f1p0/2122	--	--	--	K18723|5.14565e-14|csv:101216938|uncharacterized LOC101216938; K18723 nucleoporin GLE1 (A)	--	--	GLE1-like protein	--	A	RNA processing and modification	PREDICTED: protein GLE1 [Beta vulgaris subsp. vulgaris]
F01_c13778/f1p3/1320	[R]	General function prediction only	Molecular Function: nucleotide binding (GO:0000166);; Molecular Function: nucleic acid binding (GO:0003676);;	K12890|8.38514e-96|pop:POPTR_0014s12440g|POPTRDRAFT_664446; hypothetical protein; K12890 splicing factor, arginine/serine-rich 1/9 (A)	[A]	RNA processing and modification	RNA recognition motif. (a.k.a. RRM, RBD, or RNP domain);; RNA recognition motif (a.k.a. RRM, RBD, or RNP domain);; RNA recognition motif. (a.k.a. RRM, RBD, or RNP domain);; RNA binding motif	Serine/arginine-rich-splicing factor SR34 OS=Arabidopsis thaliana (Mouse-ear cress) PE=1 SV=1	A	RNA processing and modification	hypothetical protein POPTR_0014s12440g [Populus trichocarpa]
F01_c12079/f1p6/2848	[O]	Posttranslational modification, protein turnover, chaperones	Molecular Function: ATP binding (GO:0005524);; Biological Process: protein folding (GO:0006457);; Biological Process: response to stress (GO:0006950);; Molecular Function: unfolded protein binding (GO:0051082);;	K09487|0|mdm:103442981|heat shock protein 90-1-like; K09487 heat shock protein 90kDa beta (A)	[O]	Posttranslational modification, protein turnover, chaperones	Hsp90 protein;; Histidine kinase-, DNA gyrase B-, and HSP90-like ATPase;; Histidine kinase-, DNA gyrase B-, and HSP90-like ATPase	Endoplasmin homolog (Precursor) OS=Hordeum vulgare (Barley) PE=2 SV=1	O	Posttranslational modification, protein turnover, chaperones	PREDICTED: heat shock protein 90-1-like [Malus domestica]
F01_c17407/f1p183/1748	--	--	Cellular Component: Golgi apparatus (GO:0005794);; Cellular Component: plasma membrane (GO:0005886);; Molecular Function: zinc ion binding (GO:0008270);; Biological Process: plant-type primary cell wall biogenesis (GO:0009833);; Cellular Component: integral component of membrane (GO:0016021);; Molecular Function: cellulose synthase (UDP-forming) activity (GO:0016760);; Biological Process: cellulo…	K10999|0|vvi:100254408|cellulose synthase A catalytic subunit 1 [UDP-forming]; K10999 cellulose synthase A [EC:2.4.1.12] (A)	--	--	Cellulose synthase	Probable cellulose synthase A catalytic subunit 1 [UDP-forming] OS=Oryza sativa subsp. japonica (Rice) PE=2 SV=1	O	Posttranslational modification, protein turnover, chaperones	PREDICTED: cellulose synthase A catalytic subunit 1 [UDP-forming] [Populus euphratica]
F01_c14054/f1p17/2312	[RTKL]	--	Molecular Function: protein serine/threonine kinase activity (GO:0004674);; Molecular Function: non-membrane spanning protein tyrosine kinase activity (GO:0004715);; Molecular Function: ATP binding (GO:0005524);; Biological Process: protein phosphorylation (GO:0006468);; Molecular Function: 2-alkenal reductase [NAD(P)] activity (GO:0032440);; Biological Process: oxidation-reduction process (GO:00…	--	--	--	Di-glucose binding within endoplasmic reticulum;; Protein tyrosine kinase;; Protein kinase domain;; Leucine Rich Repeat	Probable LRR receptor-like serine/threonine-protein kinase RFK1 (Precursor) GN=RKF1 OS=Arabidopsis thaliana (Mouse-ear cress) PE=1 SV=1	T	Signal transduction mechanisms	PREDICTED: probable LRR receptor-like serine/threonine-protein kinase RFK1 isoform X1 [Vitis vinifera]
F01_c18986/f3p10/1904	[G]	Carbohydrate transport and metabolism	Molecular Function: hydrolase activity (GO:0016787);;	K01188|4.01261e-118|fve:101296690|beta-glucosidase 24-like; K01188 beta-glucosidase [EC:3.2.1.21] (A)	[G]	Carbohydrate transport and metabolism	Glycosyl hydrolase family 1	Beta-glucosidase 16 (Precursor) GN=T2O9.110 OS=Arabidopsis thaliana (Mouse-ear cress) PE=2 SV=1	G	Carbohydrate transport and metabolism	PREDICTED: beta-glucosidase 24-like [Fragaria vesca subsp. vesca]
F01_c2465/f9p14/2376	[RTKL]	--	Molecular Function: calmodulin-dependent protein kinase activity (GO:0004683);; Molecular Function: calcium ion binding (GO:0005509);; Molecular Function: ATP binding (GO:0005524);; Biological Process: protein phosphorylation (GO:0006468);;	K13412|0|fve:101309915|calcium-dependent protein kinase 9-like; K13412 calcium-dependent protein kinase [EC:2.7.11.1] (A)	[T]	Signal transduction mechanisms	Protein kinase domain;; EF hand;; Protein tyrosine kinase;; EF-hand domain pair;; EF-hand domain pair;; EF-hand domain;; EF hand;; Cytoskeletal-regulatory complex EF hand;; Secreted protein acidic and rich in cysteine Ca binding region	Calcium-dependent protein kinase isoform 2 GN=P0048D08.112 OS=Oryza sativa subsp. japonica (Rice) PE=2 SV=2	T	Signal transduction mechanisms	PREDICTED: calcium-dependent protein kinase 9-like [Fragaria vesca subsp. vesca]
F01_c4679/f1p0/2259	--	--	--	--	--	--	Protein of unknown function (DUF3292)	--	S	Function unknown	hypothetical protein PTT_15371 [Pyrenophora teres f. teres 0-1]
F01_c6993/f1p2/3588	--	--	--	--	--	--	--	--	--	--	Polyprotein, putative [Solanum demissum]
F01_c11150/f1p12/2243	--	--	Molecular Function: acid phosphatase activity (GO:0003993);; Molecular Function: metal ion binding (GO:0046872);;	--	[G]	Carbohydrate transport and metabolism	Calcineurin-like phosphoesterase	Probable inactive purple acid phosphatase 2 (Precursor) GN=PAP2 OS=Arabidopsis thaliana (Mouse-ear cress) PE=2 SV=1	G	Carbohydrate transport and metabolism	putative inactive purple acid phosphatase 2 -like protein [Gossypium arboreum]
F01_c10061/f1p0/2404	[DZ]	--	Molecular Function: binding (GO:0005488);; Cellular Component: septin cytoskeleton (GO:0032156);; Cellular Component: cytoskeletal part (GO:0044430);; Biological Process: single-organism cellular process (GO:0044763);; Cellular Component: cell periphery (GO:0071944);;	K16939|0|pxb:103942936|septin-2-like; K16939 septin 6/8/11 (A)	[D]	Cell cycle control, cell division, chromosome partitioning	Septin;; 50S ribosome-binding GTPase;; Elongation factor Tu GTP binding domain	--	D	Cell cycle control, cell division, chromosome partitioning	PREDICTED: septin-2-like, partial [Pyrus x bretschneideri]
F01_c3393/f1p1/2687	--	--	Molecular Function: mannosyl-oligosaccharide 1,2-alpha-mannosidase activity (GO:0004571);; Molecular Function: calcium ion binding (GO:0005509);; Cellular Component: endosome (GO:0005768);; Cellular Component: trans-Golgi network (GO:0005802);; Biological Process: N-glycan processing (GO:0006491);; Biological Process: ER to Golgi vesicle-mediated transport (GO:0006888);; Cellular Component: membr…	K01230|0|vvi:100243430|mannosyl-oligosaccharide 1,2-alpha-mannosidase MNS3; K01230 mannosyl-oligosaccharide alpha-1,2-mannosidase [EC:3.2.1.113] (A)	[G]	Carbohydrate transport and metabolism	Glycosyl hydrolase family 47	Mannosyl-oligosaccharide 1,2-alpha-mannosidase MNS3 GN=MNS3 OS=Arabidopsis thaliana (Mouse-ear cress) PE=2 SV=1	G	Carbohydrate transport and metabolism	PREDICTED: mannosyl-oligosaccharide 1,2-alpha-mannosidase MNS3 isoform X1 [Vitis vinifera]
F01_c5993/f1p1/1313	[CE]	--	Molecular Function: magnesium ion binding (GO:0000287);; Molecular Function: isocitrate dehydrogenase (NAD+) activity (GO:0004449);; Molecular Function: ATP binding (GO:0005524);; Biological Process: tricarboxylic acid cycle (GO:0006099);; Biological Process: isocitrate metabolic process (GO:0006102);; Molecular Function: zinc ion binding (GO:0008270);; Cellular Component: chloroplast (GO:0009507…	K00030|0|tcc:TCM_022180|Isocitrate dehydrogenase V isoform 1; K00030 isocitrate dehydrogenase (NAD+) [EC:1.1.1.41] (A)	[E]	Amino acid transport and metabolism	Isocitrate/isopropylmalate dehydrogenase	Isocitrate dehydrogenase [NAD] catalytic subunit 5, mitochondrial (Precursor) GN=IDH5 OS=Arabidopsis thaliana (Mouse-ear cress) PE=2 SV=1	E	Amino acid transport and metabolism	PREDICTED: isocitrate dehydrogenase [NAD] catalytic subunit 5, mitochondrial-like [Nelumbo nucifera]
F01_c2542/f2p0/2272	[RTKL]	--	Molecular Function: protein serine/threonine kinase activity (GO:0004674);; Molecular Function: ATP binding (GO:0005524);; Biological Process: protein phosphorylation (GO:0006468);;	--	[T]	Signal transduction mechanisms	Protein kinase domain;; Protein tyrosine kinase;; Kinase-like	Phosphoenolpyruvate carboxylase kinase 1 GN=PPCK1 OS=Arabidopsis thaliana (Mouse-ear cress) PE=1 SV=1	T	Signal transduction mechanisms	PREDICTED: phosphoenolpyruvate carboxylase kinase 1 [Vitis vinifera]
F01_c3656/f1p1/2238	--	--	Biological Process: embryo development ending in seed dormancy (GO:0009793);;	K11137|0|pmum:103338014|telomere length regulation protein TEL2 homolog; K11137 telomere length regulation protein (A)	[S]	Function unknown	Telomere length regulation protein	Probable protein phosphatase 2C 19 OS=Oryza sativa subsp. japonica (Rice) PE=3 SV=2	S	Function unknown	PREDICTED: telomere length regulation protein TEL2 homolog [Prunus mume]
F01_c15420/f1p1/2523	[Z]	Cytoskeleton	Molecular Function: microtubule motor activity (GO:0003777);; Molecular Function: ATP binding (GO:0005524);; Cellular Component: kinesin complex (GO:0005871);; Cellular Component: microtubule (GO:0005874);; Biological Process: microtubule-based movement (GO:0007018);; Molecular Function: microtubule binding (GO:0008017);;	K10401|1.19047e-75|pper:PRUPE_ppa020304mg|hypothetical protein; K10401 kinesin family member 18/19 (A)	[Z]	Cytoskeleton	Kinesin motor domain	Kinesin-like protein FLA10 GN=FLA10 OS=Chlamydomonas reinhardtii (Chlamydomonas smithii) PE=1 SV=1	Z	Cytoskeleton	hypothetical protein PRUPE_ppa020304mg, partial [Prunus persica]
F01_c4198/f1p0/4067	[V]	Defense mechanisms	Molecular Function: nucleotide binding (GO:0000166);; Biological Process: transport (GO:0006810);; Biological Process: cellular process (GO:0009987);; Molecular Function: ATPase activity, coupled to transmembrane movement of substances (GO:0042626);;	K05658|0|tcc:TCM_004938|ATP binding cassette subfamily B4 isoform 1; K05658 ATP-binding cassette, subfamily B (MDR/TAP), member 1 [EC:3.6.3.44] (A)	[Q]	Secondary metabolites biosynthesis, transport and catabolism	ABC transporter transmembrane region	ABC transporter B family member 21 GN=T17J13.110 OS=Arabidopsis thaliana (Mouse-ear cress) PE=1 SV=2	Q	Secondary metabolites biosynthesis, transport and catabolism	ATP binding cassette subfamily B4 isoform 2 [Theobroma cacao]
F01_c10482/f1p17/1512	[I]	Lipid transport and metabolism	Molecular Function: acyl-CoA dehydrogenase activity (GO:0003995);; Molecular Function: acyl-CoA oxidase activity (GO:0003997);; Cellular Component: peroxisome (GO:0005777);; Biological Process: fatty acid beta-oxidation (GO:0006635);; Molecular Function: flavin adenine dinucleotide binding (GO:0050660);;	K00232|0|cic:CICLE_v10019196mg|hypothetical protein; K00232 acyl-CoA oxidase [EC:1.3.3.6] (A)	[I]	Lipid transport and metabolism	Acyl-CoA oxidase;; Acyl-CoA dehydrogenase, C-terminal domain	Peroxisomal acyl-coenzyme A oxidase 1 GN=ACX1 OS=Arabidopsis thaliana (Mouse-ear cress) PE=1 SV=1	I	Lipid transport and metabolism	hypothetical protein CICLE_v10019196mg [Citrus clementina]
F01_c16892/f1p0/1965	--	--	Cellular Component: chloroplast (GO:0009507);;	--	[R]	General function prediction only	PPR repeat family;; PPR repeat;; Pentatricopeptide repeat domain	Pentatricopeptide repeat-containing protein At3g42630 GN=At3g42630 OS=Arabidopsis thaliana (Mouse-ear cress) PE=2 SV=2	R	General function prediction only	PREDICTED: pentatricopeptide repeat-containing protein At3g42630 [Vitis vinifera]
F01_c15854/f1p1/1453	--	--	Molecular Function: DNA binding (GO:0003677);; Molecular Function: sequence-specific DNA binding transcription factor activity (GO:0003700);; Cellular Component: nucleus (GO:0005634);; Biological Process: DNA methylation (GO:0006306);; Biological Process: methylation-dependent chromatin silencing (GO:0006346);; Biological Process: cell-cell signaling (GO:0007267);; Biological Process: virus induc…	K14486|4.70041e-101|pop:POPTR_0004s23770g|auxin response factor 1 family protein; K14486 auxin response factor (A)	--	--	Auxin response factor	Auxin response factor 7 GN=OSJNBb0038F20.6 OS=Oryza sativa subsp. japonica (Rice) PE=2 SV=1	K	Transcription	PREDICTED: auxin response factor 1 [Nelumbo nucifera]
F01_c2024/f6p4/4115	[T]	Signal transduction mechanisms	Biological Process: microtubule cytoskeleton organization (GO:0000226);; Biological Process: multidimensional cell growth (GO:0009825);; Biological Process: guard mother cell cytokinesis (GO:0010235);; Molecular Function: myosin heavy chain kinase activity (GO:0016905);; Cellular Component: Cul4-RING E3 ubiquitin ligase complex (GO:0080008);;	--	[T]	Signal transduction mechanisms	DENN (AEX-3) domain;; WD domain, G-beta repeat;; dDENN domain;; uDENN domain	DENN domain and WD repeat-containing protein SCD1 {ECO:0000305} OS=Arabidopsis thaliana (Mouse-ear cress) PE=1 SV=1	T	Signal transduction mechanisms	PREDICTED: uncharacterized protein LOC100254135 isoform X1 [Vitis vinifera]
F01_c14262/f1p0/1139	[RTKL]	--	Molecular Function: protein serine/threonine kinase activity (GO:0004674);; Molecular Function: ATP binding (GO:0005524);; Biological Process: protein phosphorylation (GO:0006468);; Biological Process: chlorophyll catabolic process (GO:0015996);; Biological Process: regulation of photosynthesis, light reaction (GO:0042548);;	--	[R]	General function prediction only	Protein kinase domain;; Phosphotransferase enzyme family;; Protein tyrosine kinase	Serine/threonine-protein kinase STN7, chloroplastic (Precursor) GN=STN7 OS=Arabidopsis thaliana (Mouse-ear cress) PE=1 SV=1	T	Signal transduction mechanisms	PREDICTED: serine/threonine-protein kinase STN7, chloroplastic-like isoform X1 [Nelumbo nucifera]
F01_c6148/f1p0/2505	--	--	Biological Process: chloroplast RNA processing (GO:0031425);;	--	[R]	General function prediction only	PPR repeat family;; PPR repeat;; PPR repeat;; Pentatricopeptide repeat domain	Pentatricopeptide repeat-containing protein At2g29760, chloroplastic (Precursor) GN=PCMP-H33 OS=Arabidopsis thaliana (Mouse-ear cress) PE=2 SV=1	R	General function prediction only	PREDICTED: pentatricopeptide repeat-containing protein At2g29760, chloroplastic [Vitis vinifera]
F01_c6745/f1p1/2745	[RTKL]	--	Molecular Function: protein serine/threonine kinase activity (GO:0004674);; Molecular Function: non-membrane spanning protein tyrosine kinase activity (GO:0004715);; Molecular Function: ATP binding (GO:0005524);; Cellular Component: plasma membrane (GO:0005886);; Biological Process: protein phosphorylation (GO:0006468);; Biological Process: microtubule nucleation (GO:0007020);; Biological Process…	--	--	--	Leucine rich repeat N-terminal domain;; Leucine Rich repeats (2 copies);; Leucine Rich Repeat;; Leucine Rich repeat	Protein NSP-INTERACTING KINASE 3 (Precursor) GN=NIK3 OS=Arabidopsis thaliana (Mouse-ear cress) PE=1 SV=1	T	Signal transduction mechanisms	PREDICTED: protein NSP-INTERACTING KINASE 3 [Vitis vinifera]
F01_c16685/f1p26/1956	--	--	--	--	[R]	General function prediction only	--	--	S	Function unknown	hypothetical protein MTR_5g051000 [Medicago truncatula]
F01_c14933/f1p5/2162	[C]	Energy production and conversion	Molecular Function: iron ion binding (GO:0005506);; Cellular Component: chloroplast thylakoid membrane (GO:0009535);; Biological Process: photosynthesis (GO:0015979);; Cellular Component: integral component of membrane (GO:0016021);; Molecular Function: oxidoreductase activity (GO:0016491);; Molecular Function: heme binding (GO:0020037);; Biological Process: respiratory electron transport chain (…	K02635|3.34521e-87|cmo:103504414|cytochrome b6; K02635 cytochrome b6 (A)	[C]	Energy production and conversion	--	Cytochrome b6 {ECO:0000255|HAMAP-Rule:MF_00633} GN=CsCp072 OS=Cucumis sativus (Cucumber) PE=3 SV=1	C	Energy production and conversion	PREDICTED: LOW QUALITY PROTEIN: cytochrome b6, partial [Cucumis melo]
F01_c13644/f1p0/1129	--	--	--	--	--	--	Seed maturation protein	Late embryogenesis abundant protein D-34 OS=Gossypium hirsutum (Upland cotton) PE=4 SV=1	S	Function unknown	PREDICTED: late embryogenesis abundant protein D-34-like [Prunus mume]
F01_c10515/f1p9/1687	[G]	Carbohydrate transport and metabolism	Cellular Component: phosphopyruvate hydratase complex (GO:0000015);; Molecular Function: magnesium ion binding (GO:0000287);; Molecular Function: phosphopyruvate hydratase activity (GO:0004634);; Biological Process: glycolytic process (GO:0006096);;	K01689|0|pxb:103955166|enolase; K01689 enolase [EC:4.2.1.11] (A)	[G]	Carbohydrate transport and metabolism	Enolase, C-terminal TIM barrel domain;; Enolase, N-terminal domain;; Methylaspartate ammonia-lyase C-terminus	Enolase OS=Ricinus communis (Castor bean) PE=2 SV=1	G	Carbohydrate transport and metabolism	PREDICTED: enolase [Pyrus x bretschneideri]
F01_c15294/f1p0/3384	--	--	--	K17822|2.63407e-40|csl:COCSUDRAFT_68098|DUF298-domain-containing protein; K17822 DCN1-like protein 1/2 (A)	[S]	Function unknown	Cullin binding	--	S	Function unknown	DUF298-domain-containing protein [Coccomyxa subellipsoidea C-169]
F01_c10720/f1p0/4409	--	--	--	--	[J]	Translation, ribosomal structure and biogenesis	--	Ribonuclease II, chloroplastic/mitochondrial (Precursor) GN=T1E22.10 OS=Arabidopsis thaliana (Mouse-ear cress) PE=2 SV=1	J	Translation, ribosomal structure and biogenesis	Ribonuclease II, putative isoform 1 [Theobroma cacao]
F01_c7849/f1p12/2328	--	--	--	K14297|0|vvi:100249633|nuclear pore complex protein NUP98A; K14297 nuclear pore complex protein Nup98-Nup96 (A)	[YU]	--	Nucleoporin autopeptidase	Nuclear pore complex protein NUP98A {ECO:0000303|PubMed:21189294} OS=Arabidopsis thaliana (Mouse-ear cress) PE=1 SV=1	1863	Nuclear pore complex protein	PREDICTED: nuclear pore complex protein NUP98A [Vitis vinifera]
F01_c7450/f1p1/3302	--	--	Molecular Function: nucleic acid binding (GO:0003676);; Molecular Function: ATP binding (GO:0005524);; Molecular Function: ATP-dependent helicase activity (GO:0008026);;	K12815|0|pper:PRUPE_ppa000450mg|hypothetical protein; K12815 pre-mRNA-splicing factor ATP-dependent RNA helicase DHX38/PRP16 [EC:3.6.4.13] (A)	[A]	RNA processing and modification	Oligonucleotide/oligosaccharide-binding (OB)-fold;; Helicase associated domain (HA2)	Probable pre-mRNA-splicing factor ATP-dependent RNA helicase GN=At3g26560 OS=Arabidopsis thaliana (Mouse-ear cress) PE=1 SV=2	A	RNA processing and modification	hypothetical protein PRUPE_ppa000450mg [Prunus persica]
F01_c4589/f1p0/1270	[L]	Replication, recombination and repair	Molecular Function: DNA binding (GO:0003677);; Molecular Function: DNA helicase activity (GO:0003678);; Molecular Function: ATP binding (GO:0005524);; Cellular Component: nucleus (GO:0005634);; Biological Process: DNA replication initiation (GO:0006270);; Biological Process: DNA duplex unwinding (GO:0032508);; Cellular Component: MCM complex (GO:0042555);;	K02542|1.30102e-53|eus:EUTSA_v10000779mg|hypothetical protein; K02542 DNA replication licensing factor MCM6 [EC:3.6.4.12] (A)	[L]	Replication, recombination and repair	MCM2/3/5 family	DNA replication licensing factor MCM6 GN=MCM6 OS=Arabidopsis thaliana (Mouse-ear cress) PE=1 SV=1	L	Replication, recombination and repair	unnamed protein product [Vitis vinifera]
F01_c17334/f1p9/1218	[R]	General function prediction only	Molecular Function: chitinase activity (GO:0004568);; Biological Process: carbohydrate metabolic process (GO:0005975);; Biological Process: chitin catabolic process (GO:0006032);; Biological Process: cell wall macromolecule catabolic process (GO:0016998);;	--	[R]	General function prediction only	Chitinase class I	Chitinase-like protein 1 (Precursor) GN=At1g05850 OS=Arabidopsis thaliana (Mouse-ear cress) PE=1 SV=1	R	General function prediction only	PREDICTED: chitinase-like protein 1 [Prunus mume]
F01_c4314/f2p8/3760	[E]	Amino acid transport and metabolism	Molecular Function: glycine dehydrogenase (decarboxylating) activity (GO:0004375);; Molecular Function: ATP binding (GO:0005524);; Cellular Component: mitochondrion (GO:0005739);; Biological Process: glycine catabolic process (GO:0006546);; Cellular Component: chloroplast envelope (GO:0009941);; Molecular Function: pyridoxal phosphate binding (GO:0030170);; Biological Process: response to cadmium…	K00281|0|vvi:100266170|glycine dehydrogenase (decarboxylating), mitochondrial; K00281 glycine dehydrogenase [EC:1.4.4.2] (A)	[E]	Amino acid transport and metabolism	Glycine cleavage system P-protein	Glycine dehydrogenase (decarboxylating) 1, mitochondrial (Precursor) GN=F26P21.130 OS=Arabidopsis thaliana (Mouse-ear cress) PE=1 SV=2	E	Amino acid transport and metabolism	PREDICTED: glycine dehydrogenase (decarboxylating), mitochondrial [Vitis vinifera]
F01_c10747/f1p2/4068	[RTKL]	--	Molecular Function: peptide receptor activity (GO:0001653);; Molecular Function: protein serine/threonine kinase activity (GO:0004674);; Molecular Function: protein tyrosine kinase activity (GO:0004713);; Molecular Function: phosphoprotein phosphatase activity (GO:0004721);; Molecular Function: ATP binding (GO:0005524);; Cellular Component: plasma membrane (GO:0005886);; Biological Process: prote…	--	--	--	Protein kinase domain;; Leucine Rich repeats (2 copies);; Protein tyrosine kinase;; Leucine rich repeat;; Leucine Rich Repeat;; Leucine rich repeat N-terminal domain;; Leucine Rich repeat	Phytosulfokine receptor 2 (Precursor) GN=PSKR2 OS=Arabidopsis thaliana (Mouse-ear cress) PE=2 SV=1	T	Signal transduction mechanisms	hypothetical protein CICLE_v10007314mg [Citrus clementina]
F01_c15533/f1p0/1095	[C]	Energy production and conversion	Cellular Component: chloroplast thylakoid membrane (GO:0009535);; Cellular Component: chloroplast envelope (GO:0009941);; Biological Process: vitamin E biosynthetic process (GO:0010189);; Biological Process: chlorophyll biosynthetic process (GO:0015995);; Molecular Function: oxidoreductase activity, acting on the CH-CH group of donors, NAD or NADP as acceptor (GO:0016628);; Biological Process: cy…	K10960|0|vvi:100243277|geranylgeranyl diphosphate reductase, chloroplastic; K10960 geranylgeranyl reductase [EC:1.3.1.83] (A)	--	--	--	Geranylgeranyl diphosphate reductase, chloroplastic (Precursor) GN=CHLP OS=Nicotiana tabacum (Common tobacco) PE=2 SV=1	H	Coenzyme transport and metabolism	Geranylgeranyl diphosphate reductase [Morus notabilis]
F01_c4147/f1p1/1391	--	--	Cellular Component: nuclear pore (GO:0005643);; Cellular Component: nucleolus (GO:0005730);; Biological Process: mRNA export from nucleus (GO:0006406);; Biological Process: protein import into nucleus (GO:0006606);; Biological Process: pyrimidine ribonucleotide biosynthetic process (GO:0009220);;	K14308|3.91242e-174|vvi:100242090|nuclear pore complex protein NUP54; K14308 nuclear pore complex protein Nup54 (A)	[YU]	--	Nucleoporin complex subunit 54	Nuclear pore complex protein NUP54 {ECO:0000303|PubMed:21189294} OS=Arabidopsis thaliana (Mouse-ear cress) PE=1 SV=1	1291	no description	PREDICTED: nuclear pore complex protein NUP54 [Vitis vinifera]
F01_c3630/f1p0/1661	[LKJ]	--	Molecular Function: nucleic acid binding (GO:0003676);; Molecular Function: ATP binding (GO:0005524);; Molecular Function: ATP-dependent helicase activity (GO:0008026);;	K12812|0|mus:103978776|DEAD-box ATP-dependent RNA helicase 56-like isoform X1; K12812 ATP-dependent RNA helicase UAP56/SUB2 [EC:3.6.4.13] (A)	[A]	RNA processing and modification	DEAD/DEAH box helicase;; Helicase conserved C-terminal domain	DEAD-box ATP-dependent RNA helicase 56 GN=B1156H12.15-1 OS=Oryza sativa subsp. japonica (Rice) PE=2 SV=2	A	RNA processing and modification	PREDICTED: DEAD-box ATP-dependent RNA helicase 56-like isoform X1 [Musa acuminata subsp. malaccensis]
F01_c16464/f1p1/1134	[R]	General function prediction only	Molecular Function: ATP binding (GO:0005524);;	K06883|7.36946e-133|tcc:TCM_002573|P-loop containing nucleoside triphosphate hydrolases superfamily protein isoform 1; K06883 (A)	[K]	Transcription	Conserved hypothetical ATP binding protein	--	K	Transcription	P-loop containing nucleoside triphosphate hydrolases superfamily protein isoform 1 [Theobroma cacao]
F01_c16181/f1p0/1583	[J]	Translation, ribosomal structure and biogenesis	Molecular Function: methionine-tRNA ligase activity (GO:0004825);; Molecular Function: ATP binding (GO:0005524);; Cellular Component: mitochondrion (GO:0005739);; Biological Process: methionyl-tRNA aminoacylation (GO:0006431);; Cellular Component: chloroplast stroma (GO:0009570);; Biological Process: ovule development (GO:0048481);;	K01874|0|pop:POPTR_0010s21430g|POPTRDRAFT_1092152; methionyl-tRNA synthetase family protein; K01874 methionyl-tRNA synthetase [EC:6.1.1.10] (A)	[J]	Translation, ribosomal structure and biogenesis	tRNA synthetases class I (M);; tRNA synthetases class I (I, L, M and V);; Anticodon-binding domain of tRNA;; tRNA synthetases class I (C) catalytic domain	Probable methionine--tRNA ligase OS=Oryza sativa subsp. japonica (Rice) PE=2 SV=2	J	Translation, ribosomal structure and biogenesis	hypothetical protein JCGZ_01491 [Jatropha curcas]
F01_c8404/f1p0/2363	--	--	Molecular Function: nucleic acid binding (GO:0003676);; Molecular Function: metal ion binding (GO:0046872);;	--	[A]	RNA processing and modification	G-patch domain	Zinc finger CCCH domain-containing protein 18 OS=Oryza sativa subsp. japonica (Rice) PE=2 SV=1	A	RNA processing and modification	PREDICTED: zinc finger CCCH domain-containing protein 22 [Prunus mume]
F01_c1244/f7p7/3918	--	--	Biological Process: defense response (GO:0006952);; Cellular Component: cytoplasmic membrane-bounded vesicle (GO:0016023);; Molecular Function: ADP binding (GO:0043531);;	--	--	--	Armadillo/beta-catenin-like repeat	Late blight resistance protein R1-A GN=R1A OS=Solanum demissum (Wild potato) PE=3 SV=1	S	Function unknown	PREDICTED: uncharacterized protein LOC100261821 [Vitis vinifera]
F01_c13121/f37p41/3575	[O]	Posttranslational modification, protein turnover, chaperones	Biological Process: protein O-linked glycosylation (GO:0006493);; Molecular Function: transferase activity, transferring glycosyl groups (GO:0016757);;	K09667|0|vvi:100244912|probable UDP-N-acetylglucosamine--peptide N-acetylglucosaminyltransferase SEC; K09667 protein O-GlcNAc transferase [EC:2.4.1.255] (A)	[GOT]	--	Glycosyl transferase family 41;; Tetratricopeptide repeat;; TPR repeat;; Tetratricopeptide repeat;; Tetratricopeptide repeat;; Tetratricopeptide repeat;; Tetratricopeptide repeat;; Tetratricopeptide repeat;; Tetratricopeptide repeat;; Tetratricopeptide repeat;; Tetratricopeptide repeat;; Tetratricopeptide repeat;; Tetratricopeptide repeat;; Tetratricopeptide repeat;; Anaphase-promoting complex, c…	Probable UDP-N-acetylglucosamine--peptide N-acetylglucosaminyltransferase SEC GN=SEC OS=Arabidopsis thaliana (Mouse-ear cress) PE=2 SV=1	4525	UDP-N-acetylglucosamine--peptide N-acetylglucosaminyltransferase	PREDICTED: probable UDP-N-acetylglucosamine--peptide N-acetylglucosaminyltransferase SEC isoform X3 [Vitis vinifera]
F01_c7875/f2p2/2047	--	--	Molecular Function: hydrolase activity (GO:0016787);;	K11843|3.45295e-40|tcc:TCM_028999|Ubiquitin-specific protease 6; K11843 ubiquitin carboxyl-terminal hydrolase 14 [EC:3.4.19.12] (A)	[O]	Posttranslational modification, protein turnover, chaperones	--	Ubiquitin carboxyl-terminal hydrolase 7 GN=UBP7 OS=Arabidopsis thaliana (Mouse-ear cress) PE=1 SV=1	O	Posttranslational modification, protein turnover, chaperones	Ubiquitin-specific protease 6 [Theobroma cacao]
F01_c13132/f1p1/2025	--	--	Molecular Function: zinc ion binding (GO:0008270);; Biological Process: phloem development (GO:0010088);; Biological Process: root development (GO:0048364);;	--	[TZ]	--	Ubiquitin interaction motif	Protein DA1 GN=T29M8.14 OS=Arabidopsis thaliana (Mouse-ear cress) PE=1 SV=1	990	DA1-related	PREDICTED: protein DA1-related 2 isoform X1 [Vitis vinifera]
F01_c9179/f1p4/1000	[O]	Posttranslational modification, protein turnover, chaperones	Molecular Function: Rab GDP-dissociation inhibitor activity (GO:0005093);; Biological Process: protein transport (GO:0015031);;	K17255|3.29997e-180|cit:102625537|rab GDP dissociation inhibitor alpha-like; K17255 Rab GDP dissociation inhibitor (A)	[O]	Posttranslational modification, protein turnover, chaperones	GDP dissociation inhibitor	Guanosine nucleotide diphosphate dissociation inhibitor 2 GN=GDI2 OS=Arabidopsis thaliana (Mouse-ear cress) PE=2 SV=1	O	Posttranslational modification, protein turnover, chaperones	hypothetical protein CISIN_1g013352mg [Citrus sinensis]
F01_c7800/f1p1/2524	[RTKL]	--	--	--	--	--	Protein kinase domain;; Protein tyrosine kinase	G-type lectin S-receptor-like serine/threonine-protein kinase At4g27290 (Precursor) GN=At4g27290 OS=Arabidopsis thaliana (Mouse-ear cress) PE=3 SV=4	T	Signal transduction mechanisms	unnamed protein product [Coffea canephora]
F01_c5207/f1p8/1302	--	--	--	--	--	--	TPR repeat;; Tetratricopeptide repeat;; Tetratricopeptide repeat	--	S	Function unknown	PREDICTED: aspartate, glycine, lysine and serine-rich protein [Pyrus x bretschneideri]
F01_c16824/f1p5/3708	--	--	--	--	--	--	Plant protein of unknown function (DUF869)	Filament-like plant protein 4 GN=FPP4 OS=Arabidopsis thaliana (Mouse-ear cress) PE=1 SV=1	S	Function unknown	PREDICTED: filament-like plant protein 4 isoform X1 [Vitis vinifera]
F01_c2205/f2p21/1214	[C]	Energy production and conversion	Cellular Component: plasma membrane (GO:0005886);; Cellular Component: chloroplast thylakoid membrane (GO:0009535);; Cellular Component: integral component of membrane (GO:0016021);; Biological Process: plasma membrane ATP synthesis coupled proton transport (GO:0042777);; Cellular Component: proton-transporting ATP synthase complex, coupling factor F(o) (GO:0045263);; Molecular Function: proton-t…	K02108|1.56479e-116|sot:4099857|atpI, SotuCp009; ATPase IV subunit; K02108 F-type H+-transporting ATPase subunit a (A)	[C]	Energy production and conversion	ATP synthase A chain	ATP synthase subunit a, chloroplastic {ECO:0000255|HAMAP-Rule:MF_01393} OS=Nicotiana tabacum (Common tobacco) PE=3 SV=1	C	Energy production and conversion	ATP synthase CF0 subunit IV (chloroplast) [Paeonia obovata]
F01_c5368/f4p2/2336	--	--	Cellular Component: plastid (GO:0009536);;	--	--	--	--	Uncharacterized protein ORF91 OS=Phalaenopsis aphrodite subsp. formosana (Moth orchid) PE=4 SV=1	S	Function unknown	Cell wall-associated hydrolase, partial [Medicago truncatula]
F01_c12026/f2p3/1934	--	--	Molecular Function: phosphatidylcholine-sterol O-acyltransferase activity (GO:0004607);; Molecular Function: phospholipase activity (GO:0004620);; Cellular Component: cytosol (GO:0005829);; Biological Process: membrane fusion (GO:0006944);; Biological Process: phospholipid catabolic process (GO:0009395);; Biological Process: Golgi vesicle transport (GO:0048193);;	--	[I]	Lipid transport and metabolism	Lecithin:cholesterol acyltransferase;; PGAP1-like protein;; Putative serine esterase (DUF676)	Lecithin-cholesterol acyltransferase-like 4 GN=LCAT4 OS=Arabidopsis thaliana (Mouse-ear cress) PE=1 SV=1	I	Lipid transport and metabolism	PREDICTED: lecithin-cholesterol acyltransferase-like 4 [Vitis vinifera]
F01_c11713/f2p0/1446	[E]	Amino acid transport and metabolism	Molecular Function: homoserine dehydrogenase activity (GO:0004412);; Biological Process: methionine biosynthetic process (GO:0009086);; Biological Process: threonine biosynthetic process (GO:0009088);; Biological Process: isoleucine biosynthetic process (GO:0009097);; Molecular Function: kinase activity (GO:0016301);; Biological Process: phosphorylation (GO:0016310);; Biological Process: oxidatio…	--	[E]	Amino acid transport and metabolism	Homoserine dehydrogenase	Homoserine dehydrogenase (Precursor; Fragment) OS=Daucus carota (Wild carrot) PE=1 SV=1	C	Energy production and conversion	hypothetical protein JCGZ_23847 [Jatropha curcas]
F01_c11157/f1p2/3905	[K]	Transcription	Molecular Function: DNA binding (GO:0003677);; Molecular Function: DNA-directed RNA polymerase activity (GO:0003899);; Biological Process: transcription, DNA-templated (GO:0006351);; Molecular Function: ribonucleoside binding (GO:0032549);;	K03021|0|vvi:100264262|POLR3B; DNA-directed RNA polymerase III subunit RPC2; K03021 DNA-directed RNA polymerase III subunit RPC2 [EC:2.7.7.6] (A)	[K]	Transcription	RNA polymerase Rpb2, domain 6	DNA-directed RNA polymerase II subunit RPB2 GN=RPB2 OS=Solanum lycopersicum (Tomato) PE=2 SV=1	K	Transcription	PREDICTED: DNA-directed RNA polymerase III subunit RPC2 [Vitis vinifera]
F01_c5764/f2p0/1185	[IR]	--	Molecular Function: carboxylic ester hydrolase activity (GO:0004091);; Biological Process: lipid metabolic process (GO:0006629);; Biological Process: proline transport (GO:0015824);; Molecular Function: lipase activity (GO:0016298);;	--	--	--	GDSL-like Lipase/Acylhydrolase	GDSL esterase/lipase At5g55050 (Precursor) GN=At5g55050 OS=Arabidopsis thaliana (Mouse-ear cress) PE=2 SV=1	R	General function prediction only	PREDICTED: GDSL esterase/lipase At5g55050-like [Nelumbo nucifera]
F01_c1517/f1p3/962	--	--	--	--	--	--	AWPM-19-like family	--	S	Function unknown	hypothetical protein VITISV_041433 [Vitis vinifera]
F01_c13671/f1p1/1259	[C]	Energy production and conversion	Molecular Function: FMN binding (GO:0010181);; Molecular Function: very-long-chain-(S)-2-hydroxy-acid oxidase activity (GO:0052852);; Molecular Function: long-chain-(S)-2-hydroxy-long-chain-acid oxidase activity (GO:0052853);; Molecular Function: medium-chain-(S)-2-hydroxy-acid oxidase activity (GO:0052854);; Biological Process: oxidation-reduction process (GO:0055114);;	K11517|0|vvi:100248111|peroxisomal (S)-2-hydroxy-acid oxidase GLO4; K11517 (S)-2-hydroxy-acid oxidase [EC:1.1.3.15] (A)	[C]	Energy production and conversion	FMN-dependent dehydrogenase;; IMP dehydrogenase / GMP reductase domain;; Nitronate monooxygenase;; Thiazole biosynthesis protein ThiG;; Conserved region in glutamate synthase	Peroxisomal (S)-2-hydroxy-acid oxidase GLO4 GN=GLO4 OS=Arabidopsis thaliana (Mouse-ear cress) PE=2 SV=1	C	Energy production and conversion	hypothetical protein VITISV_031318 [Vitis vinifera]
F01_c15801/f1p0/2578	[RTKL]	--	Biological Process: activation of MAPKK activity (GO:0000186);; Molecular Function: MAP kinase kinase kinase activity (GO:0004709);; Molecular Function: ATP binding (GO:0005524);; Cellular Component: plasma membrane (GO:0005886);;	--	--	--	Protein kinase domain;; Protein tyrosine kinase	Probable LRR receptor-like serine/threonine-protein kinase At1g56130 (Precursor) GN=At1g56130 OS=Arabidopsis thaliana (Mouse-ear cress) PE=2 SV=2	T	Signal transduction mechanisms	unnamed protein product [Vitis vinifera]
F01_c1549/f12p2/3337	--	--	--	--	[D]	Cell cycle control, cell division, chromosome partitioning	RNA recognition motif 2;; RNA recognition motif. (a.k.a. RRM, RBD, or RNP domain);; RNA recognition motif. (a.k.a. RRM, RBD, or RNP domain);; RNA recognition motif (a.k.a. RRM, RBD, or RNP domain)	Protein MEI2-like 2 GN=OJ1008_D06.12-1 OS=Oryza sativa subsp. japonica (Rice) PE=2 SV=1	D	Cell cycle control, cell division, chromosome partitioning	PREDICTED: protein MEI2-like 2 [Vitis vinifera]
F01_c2106/f3p0/1034	--	--	--	--	--	--	Phloem protein 2	F-box protein At2g02240 GN=At2g02240 OS=Arabidopsis thaliana (Mouse-ear cress) PE=2 SV=1	R	General function prediction only	PREDICTED: F-box protein PP2-B10-like [Nelumbo nucifera]
F01_c16091/f1p1/2451	--	--	Cellular Component: vacuolar membrane (GO:0005774);; Cellular Component: endoplasmic reticulum (GO:0005783);; Cellular Component: integral component of membrane (GO:0016021);; Biological Process: protein processing (GO:0016485);;	K06171|0|vvi:100241276|nicastrin; K06171 nicastrin (A)	[TO]	--	Nicastrin	Nicastrin (Precursor) GN=At3g52640/At3g52650 OS=Arabidopsis thaliana (Mouse-ear cress) PE=2 SV=1	1456	nicastrin	PREDICTED: nicastrin [Vitis vinifera]
F01_c18821/f2p8/1682	[J]	Translation, ribosomal structure and biogenesis	Molecular Function: translation elongation factor activity (GO:0003746);; Molecular Function: GTPase activity (GO:0003924);; Molecular Function: GTP binding (GO:0005525);; Cellular Component: cytoplasm (GO:0005737);; Biological Process: GTP catabolic process (GO:0006184);; Biological Process: translational elongation (GO:0006414);;	K03231|0|gmx:100785429|elongation factor 1-alpha-like; K03231 elongation factor 1-alpha (A)	[J]	Translation, ribosomal structure and biogenesis	Elongation factor Tu GTP binding domain;; Elongation factor Tu C-terminal domain;; Elongation factor Tu domain 2;; 50S ribosome-binding GTPase	Elongation factor 1-alpha GN=EF1 OS=Manihot esculenta (Cassava) PE=3 SV=1	J	Translation, ribosomal structure and biogenesis	Elongation factor 1-alpha [Glycine soja]
F01_c11972/f2p0/1097	--	--	--	K08288|4.77537e-69|cit:102617815|glucosidase 2 subunit beta-like; K08288 protein kinase C substrate 80K-H (A)	[T]	Signal transduction mechanisms	Glucosidase II beta subunit-like	Glucosidase 2 subunit beta (Precursor) GN=PSL4 OS=Arabidopsis thaliana (Mouse-ear cress) PE=2 SV=1	T	Signal transduction mechanisms	PREDICTED: glucosidase 2 subunit beta-like isoform X2 [Citrus sinensis]
F01_c5988/f1p1/1266	--	--	Cellular Component: plasma membrane (GO:0005886);; Biological Process: carbohydrate transport (GO:0008643);; Cellular Component: chloroplast (GO:0009507);; Cellular Component: integral component of membrane (GO:0016021);;	K15382|5.91709e-85|fve:101312637|bidirectional sugar transporter SWEET7-like; K15382 solute carrier family 50 (sugar transporter) (A)	[R]	General function prediction only	Sugar efflux transporter for intercellular exchange	Bidirectional sugar transporter SWEET7 OS=Arabidopsis thaliana (Mouse-ear cress) PE=2 SV=1	R	General function prediction only	hypothetical protein EUGRSUZ_D01702 [Eucalyptus grandis]
F01_c1901/f7p12/3906	[T]	Signal transduction mechanisms	Molecular Function: phosphorelay sensor kinase activity (GO:0000155);; Biological Process: phosphorelay signal transduction system (GO:0000160);; Molecular Function: ATP binding (GO:0005524);; Cellular Component: mitochondrion (GO:0005739);; Biological Process: regulation of transcription, DNA-templated (GO:0006355);; Biological Process: circadian rhythm (GO:0007623);; Molecular Function: G-prote…	K12120|0|vvi:100240824|PHYA; phytochrome A; K12120 phytochrome A (A)	--	--	PAS fold;; GAF domain	Phytochrome A1 GN=PHYA1 OS=Nicotiana tabacum (Common tobacco) PE=3 SV=1	K	Transcription	PREDICTED: phytochrome A1 [Vitis vinifera]
F01_c11857/f2p1/1365	[R]	General function prediction only	--	K06990|1.51264e-177|vvi:100256144|protein MEMO1; K06990 (A)	[R]	General function prediction only	Memo-like protein	--	R	General function prediction only	Protein MEMO1 [Gossypium arboreum]
F01_c4806/f1p1/2347	[R]	General function prediction only	--	K03070|0|vvi:100248990|protein translocase subunit SECA2, chloroplastic; K03070 preprotein translocase subunit SecA (A)	--	--	WD domain, G-beta repeat	Putative coatomer subunit beta&apos;-3 GN=OJ1006_A02.22 OS=Oryza sativa subsp. japonica (Rice) PE=3 SV=2	U	Intracellular trafficking, secretion, and vesicular transport	PREDICTED: protein translocase subunit SECA2, chloroplastic isoform X2 [Vitis vinifera]
F01_c11530/f1p0/3227	--	--	--	--	--	--	--	--	S	Function unknown	Kinase interacting (KIP1-like) family protein, putative [Theobroma cacao]
F01_c5200/f1p4/1288	--	--	Molecular Function: calcium ion binding (GO:0005509);; Molecular Function: calcium-dependent phospholipid binding (GO:0005544);;	K17099|4.43068e-171|tcc:TCM_045338|Annexin-like protein RJ4 isoform 1; K17099 annexin A13 (A)	[U]	Intracellular trafficking, secretion, and vesicular transport	Annexin	Annexin-like protein RJ4 OS=Fragaria ananassa (Strawberry) PE=2 SV=2	U	Intracellular trafficking, secretion, and vesicular transport	PREDICTED: annexin-like protein RJ4-like isoform 2 [Fragaria vesca subsp. vesca]
F01_c7690/f1p9/1450	--	--	Biological Process: response to toxic substance (GO:0009636);; Biological Process: response to salt stress (GO:0009651);; Biological Process: xenobiotic catabolic process (GO:0042178);; Molecular Function: quercetin 3-O-glucosyltransferase activity (GO:0080043);;	K08237|0|tcc:TCM_005182|UDP-Glycosyltransferase superfamily protein; K08237 hydroquinone glucosyltransferase [EC:2.4.1.218] (A)	[GC]	--	UDP-glucoronosyl and UDP-glucosyl transferase	Hydroquinone glucosyltransferase GN=AS OS=Rauvolfia serpentina (Serpentine wood) PE=1 SV=1	862	Hydroquinone	UDP-Glycosyltransferase superfamily protein [Theobroma cacao]
F01_c14107/f2p0/3630	[RTKL]	--	Molecular Function: protein serine/threonine kinase activity (GO:0004674);; Molecular Function: ATP binding (GO:0005524);; Cellular Component: nucleus (GO:0005634);; Cellular Component: cytoplasm (GO:0005737);; Cellular Component: plasma membrane (GO:0005886);; Biological Process: protein phosphorylation (GO:0006468);;	K04733|2.32868e-177|vvi:100253317|protein kinase 2B, chloroplastic; K04733 interleukin-1 receptor-associated kinase 4 [EC:2.7.11.1] (A)	[T]	Signal transduction mechanisms	Protein kinase domain;; Protein tyrosine kinase	Protein kinase 2B, chloroplastic (Precursor) GN=APK2B OS=Arabidopsis thaliana (Mouse-ear cress) PE=2 SV=1	T	Signal transduction mechanisms	PREDICTED: protein kinase 2B, chloroplastic isoform X2 [Vitis vinifera]
F01_c6112/f1p2/3146	[R]	General function prediction only	--	--	--	--	von Willebrand factor type A domain	--	R	General function prediction only	PREDICTED: inter-alpha-trypsin inhibitor heavy chain H3 isoform X1 [Vitis vinifera]
F01_c7292/f3p3/1276	[R]	General function prediction only	Molecular Function: organic cyclic compound binding (GO:0097159);; Molecular Function: heterocyclic compound binding (GO:1901363);;	--	[R]	General function prediction only	RNA recognition motif. (a.k.a. RRM, RBD, or RNP domain);; RNA recognition motif (a.k.a. RRM, RBD, or RNP domain);; RNA recognition motif. (a.k.a. RRM, RBD, or RNP domain)	28 kDa ribonucleoprotein, chloroplastic (Precursor) OS=Nicotiana sylvestris (Wood tobacco) PE=1 SV=1	A	RNA processing and modification	PREDICTED: 28 kDa ribonucleoprotein, chloroplastic-like [Nelumbo nucifera]
F01_c2921/f4p13/1147	[G]	Carbohydrate transport and metabolism	Molecular Function: fructose-bisphosphate aldolase activity (GO:0004332);; Biological Process: glycolytic process (GO:0006096);; Biological Process: response to abscisic acid (GO:0009737);; Cellular Component: chloroplast envelope (GO:0009941);; Cellular Component: plastoglobule (GO:0010287);; Cellular Component: membrane (GO:0016020);; Cellular Component: cytosolic ribosome (GO:0022626);; Cellul…	K01623|0|fve:101299626|probable fructose-bisphosphate aldolase 2, chloroplastic-like; K01623 fructose-bisphosphate aldolase, class I [EC:4.1.2.13] (A)	[G]	Carbohydrate transport and metabolism	Fructose-bisphosphate aldolase class-I	Fructose-bisphosphate aldolase, chloroplastic (Precursor) OS=Oryza sativa subsp. japonica (Rice) PE=1 SV=2	G	Carbohydrate transport and metabolism	plastidic aldolase [Catharanthus roseus]
F01_c13487/f1p0/1714	--	--	Biological Process: cellular process (GO:0009987);;	--	--	--	--	--	S	Function unknown	PREDICTED: uncharacterized protein LOC104600314 isoform X2 [Nelumbo nucifera]
F01_c11820/f2p5/1951	[G]	Carbohydrate transport and metabolism	Molecular Function: protein serine/threonine kinase activity (GO:0004674);; Molecular Function: ATP binding (GO:0005524);; Cellular Component: peroxisome (GO:0005777);; Biological Process: protein phosphorylation (GO:0006468);; Biological Process: fatty acid biosynthetic process (GO:0006633);; Biological Process: phospholipid biosynthetic process (GO:0008654);; Cellular Component: membrane (GO:00…	K01578|0|tcc:TCM_030293|Malonyl-CoA decarboxylase family protein isoform 1; K01578 malonyl-CoA decarboxylase [EC:4.1.1.9] (A)	[G]	Carbohydrate transport and metabolism	Malonyl-CoA decarboxylase (MCD)	--	G	Carbohydrate transport and metabolism	PREDICTED: malonyl-CoA decarboxylase, mitochondrial [Vitis vinifera]
F01_c5071/f1p0/1213	--	--	Molecular Function: nucleotide binding (GO:0000166);; Molecular Function: RNA binding (GO:0003723);; Cellular Component: nucleus (GO:0005634);; Molecular Function: transferase activity, transferring phosphorus-containing groups (GO:0016772);; Molecular Function: metal ion binding (GO:0046872);;	K12836|1.10476e-50|mtr:MTR_1g035130|Splicing factor U2af small subunit B; K12836 splicing factor U2AF 35 kDa subunit (A)	[A]	RNA processing and modification	Zinc finger C-x8-C-x5-C-x3-H type (and similar)	Splicing factor U2af small subunit B OS=Oryza sativa subsp. japonica (Rice) PE=2 SV=1	A	RNA processing and modification	hypothetical protein SNOG_09827 [Phaeosphaeria nodorum SN15]
F01_c12491/f1p12/1674	[P]	Inorganic ion transport and metabolism	Molecular Function: catalase activity (GO:0004096);; Cellular Component: cell wall (GO:0005618);; Cellular Component: mitochondrion (GO:0005739);; Cellular Component: vacuole (GO:0005773);; Cellular Component: peroxisome (GO:0005777);; Cellular Component: plasma membrane (GO:0005886);; Biological Process: starch metabolic process (GO:0005982);; Biological Process: cellular response to nitrogen st…	K03781|0|pop:POPTR_0002s01080g|POPTRDRAFT_550767; catalase family protein; K03781 catalase [EC:1.11.1.6] (A)	[P]	Inorganic ion transport and metabolism	Catalase;; Catalase-related immune-responsive	Catalase isozyme 1 GN=CAT1 OS=Gossypium hirsutum (Upland cotton) PE=2 SV=2	P	Inorganic ion transport and metabolism	catalase [Gossypium hirsutum]
F01_c21392/f1p2/3452	[T]	Signal transduction mechanisms	--	--	[R]	General function prediction only	WD domain, G-beta repeat;; Nucleoporin Nup120/160	Transcriptional corepressor LEUNIG GN=LUG OS=Arabidopsis thaliana (Mouse-ear cress) PE=1 SV=2	R	General function prediction only	Transcriptional corepressor LEUNIG [Morus notabilis]
F01_c17796/f1p1/1099	[O]	Posttranslational modification, protein turnover, chaperones	Biological Process: cation transport (GO:0006812);; Molecular Function: electron carrier activity (GO:0009055);; Cellular Component: chloroplast stroma (GO:0009570);; Molecular Function: protein disulfide oxidoreductase activity (GO:0015035);; Biological Process: cell redox homeostasis (GO:0045454);; Biological Process: anther development (GO:0048653);;	--	[O]	Posttranslational modification, protein turnover, chaperones	Glutaredoxin;; SH3-binding, glutamic acid-rich protein	Monothiol glutaredoxin-S16, chloroplastic (Precursor) GN=GRXS16 OS=Arabidopsis thaliana (Mouse-ear cress) PE=1 SV=2	O	Posttranslational modification, protein turnover, chaperones	PREDICTED: monothiol glutaredoxin-S16, chloroplastic [Vitis vinifera]
F01_c7525/f1p1/2236	[K]	Transcription	Cellular Component: nucleus (GO:0005634);; Biological Process: regulation of transcription, DNA-templated (GO:0006355);;	K12605|0|vvi:100248449|probable NOT transcription complex subunit VIP2; K12605 CCR4-NOT transcription complex subunit 2 (A)	[KDR]	--	NOT2 / NOT3 / NOT5 family	Probable NOT transcription complex subunit VIP2 (Fragment) GN=VIP2 OS=Nicotiana benthamiana PE=1 SV=1	K	Transcription	PREDICTED: probable NOT transcription complex subunit VIP2 isoform X1 [Vitis vinifera]
F01_c6765/f1p2/1616	[H]	Coenzyme transport and metabolism	Molecular Function: pantothenate kinase activity (GO:0004594);; Molecular Function: ATP binding (GO:0005524);; Cellular Component: cytosol (GO:0005829);; Biological Process: protein N-linked glycosylation (GO:0006487);; Biological Process: coenzyme A biosynthetic process (GO:0015937);;	K09680|2.91118e-125|tcc:TCM_012079|Pantothenate kinase 2 isoform 1; K09680 type II pantothenate kinase [EC:2.7.1.33] (A)	[H]	Coenzyme transport and metabolism	Fumble	Pantothenate kinase 2 GN=PANK2 OS=Arabidopsis thaliana (Mouse-ear cress) PE=1 SV=2	H	Coenzyme transport and metabolism	Pantothenate kinase 2 isoform 1 [Theobroma cacao]
F01_c11909/f1p0/2450	[GEPR]	--	--	--	--	--	BT1 family;; Major Facilitator Superfamily	Probable folate-biopterin transporter 2 GN=At5g25050 OS=Arabidopsis thaliana (Mouse-ear cress) PE=2 SV=1	R	General function prediction only	PREDICTED: probable folate-biopterin transporter 2 [Vitis vinifera]
F01_c15175/f1p1/2218	[O]	Posttranslational modification, protein turnover, chaperones	Biological Process: metabolic process (GO:0008152);; Molecular Function: amino acid binding (GO:0016597);;	--	--	--	ACT domain;; ACT domain;; ACT domain	ACT domain-containing protein ACR4 {ECO:0000305} OS=Arabidopsis thaliana (Mouse-ear cress) PE=2 SV=1	S	Function unknown	--
F01_c2196/f6p9/1750	[Q]	Secondary metabolites biosynthesis, transport and catabolism	Molecular Function: iron ion binding (GO:0005506);; Molecular Function: electron carrier activity (GO:0009055);; Molecular Function: heme binding (GO:0020037);; Molecular Function: flavonoid 3',5'-hydroxylase activity (GO:0033772);; Biological Process: oxidation-reduction process (GO:0055114);;	--	[Q]	Secondary metabolites biosynthesis, transport and catabolism	Cytochrome P450	Cytochrome P450 71A1 GN=CYP71A1 OS=Persea americana (Avocado) PE=1 SV=2	Q	Secondary metabolites biosynthesis, transport and catabolism	Cytochrome P450 superfamily protein [Theobroma cacao]
F01_c16015/f1p0/1526	--	--	Molecular Function: nucleic acid binding (GO:0003676);; Molecular Function: catalytic activity (GO:0003824);; Biological Process: DNA metabolic process (GO:0006259);;	--	--	--	--	--	R	General function prediction only	PREDICTED: uncharacterized protein LOC101214669 [Cucumis sativus]
F01_c6056/f1p0/1063	[RTKL]	--	Molecular Function: protein serine/threonine kinase activity (GO:0004674);; Molecular Function: protein tyrosine kinase activity (GO:0004713);; Molecular Function: ATP binding (GO:0005524);; Biological Process: protein phosphorylation (GO:0006468);;	K08790|9.25082e-109|obr:102700103|serine/threonine-protein kinase CBK1-like; K08790 serine/threonine kinase 38 [EC:2.7.11.1] (A)	[R]	General function prediction only	--	Probable serine/threonine protein kinase IRE3 {ECO:0000305} OS=Arabidopsis thaliana (Mouse-ear cress) PE=2 SV=1	T	Signal transduction mechanisms	Protein kinase domain containing protein, expressed [Oryza sativa Japonica Group]
F01_c15837/f1p2/3624	[RTKL]	--	Molecular Function: protein serine/threonine kinase activity (GO:0004674);; Molecular Function: ATP binding (GO:0005524);; Biological Process: protein phosphorylation (GO:0006468);;	--	[T]	Signal transduction mechanisms	Protein tyrosine kinase	Serine/threonine-protein kinase EDR1 GN=F22O13.20 OS=Arabidopsis thaliana (Mouse-ear cress) PE=1 SV=1	T	Signal transduction mechanisms	Tyrosine kinase family protein isoform 6 [Theobroma cacao]
F01_c12689/f1p8/1400	[J]	Translation, ribosomal structure and biogenesis	Molecular Function: structural constituent of ribosome (GO:0003735);; Biological Process: translation (GO:0006412);; Cellular Component: chloroplast (GO:0009507);; Cellular Component: large ribosomal subunit (GO:0015934);; Molecular Function: transferase activity (GO:0016740);; Molecular Function: rRNA binding (GO:0019843);;	K02886|5.39419e-93|mtr:MTR_4g047920|50S ribosomal protein L2; K02886 large subunit ribosomal protein L2 (A)	[J]	Translation, ribosomal structure and biogenesis	Ribosomal protein L23	50S ribosomal protein L2-A, chloroplastic GN=rpl2-A OS=Chloranthus spicatus (Chulantree) PE=3 SV=1	J	Translation, ribosomal structure and biogenesis	ribosomal protein L23 [Erodium chrysanthum]
F01_c4193/f1p3/2201	--	--	--	--	--	--	Protein of unknown function (DUF632)	--	S	Function unknown	PREDICTED: uncharacterized protein LOC105108845 [Populus euphratica]
F01_c9397/f1p4/4246	--	--	Cellular Component: cytosol (GO:0005829);;	--	--	--	Inositol hexakisphosphate;; C-terminal general transcription factor TFIIE alpha	--	S	Function unknown	PREDICTED: paladin [Vitis vinifera]
F01_c11260/f2p2/2306	[O]	Posttranslational modification, protein turnover, chaperones	Molecular Function: DNA binding (GO:0003677);; Molecular Function: serine-type endopeptidase activity (GO:0004252);; Cellular Component: nucleolus (GO:0005730);; Biological Process: mRNA export from nucleus (GO:0006406);; Biological Process: proteolysis (GO:0006508);; Biological Process: protein import into nucleus (GO:0006606);; Cellular Component: chloroplast (GO:0009507);; Molecular Function: …	--	[O]	Posttranslational modification, protein turnover, chaperones	Trypsin;; Trypsin-like peptidase domain;; PDZ domain	Protease Do-like 9 GN=DEGP9 OS=Arabidopsis thaliana (Mouse-ear cress) PE=1 SV=1	O	Posttranslational modification, protein turnover, chaperones	PREDICTED: protease Do-like 9 [Vitis vinifera]
F01_c4507/f1p0/3010	--	--	--	--	[R]	General function prediction only	LisH	Transcriptional corepressor LEUNIG GN=LUG OS=Arabidopsis thaliana (Mouse-ear cress) PE=1 SV=2	R	General function prediction only	Transcriptional corepressor LEUNIG [Morus notabilis]
F01_c1089/f1p3/946	--	--	Biological Process: response to UV-B (GO:0010224);; Biological Process: brassinosteroid metabolic process (GO:0016131);; Molecular Function: anthocyanidin 3-O-glucosyltransferase activity (GO:0047213);; Molecular Function: trans-zeatin O-beta-D-glucosyltransferase activity (GO:0050403);; Molecular Function: cis-zeatin O-beta-D-glucosyltransferase activity (GO:0050502);; Biological Process: flavon…	K13496|5.63806e-69|vvi:100248767|UDP-glycosyltransferase 73C2; K13496 UDP-glucosyl transferase 73C [EC:2.4.1.-] (A)	[GC]	--	--	UDP-glycosyltransferase 73C5 GN=F13K3.20 OS=Arabidopsis thaliana (Mouse-ear cress) PE=2 SV=1	392	UDP-Glycosyltransferase	PREDICTED: UDP-glycosyltransferase 73C2 isoform X1 [Vitis vinifera]
F01_c2497/f2p3/3617	[R]	General function prediction only	Molecular Function: protein kinase activity (GO:0004672);; Molecular Function: ATP binding (GO:0005524);; Biological Process: protein phosphorylation (GO:0006468);; Molecular Function: ligase activity (GO:0016874);; Molecular Function: 2-alkenal reductase [NAD(P)] activity (GO:0032440);; Biological Process: oxidation-reduction process (GO:0055114);;	--	--	--	WD domain, G-beta repeat	Protein SPA1-RELATED 4 GN=SPA4 OS=Arabidopsis thaliana (Mouse-ear cress) PE=1 SV=1	J	Translation, ribosomal structure and biogenesis	SPA1-RELATED 4 family protein [Populus trichocarpa]
F01_c1914/f6p7/2690	[R]	General function prediction only	--	--	[R]	General function prediction only	Ankyrin repeats (many copies);; Ankyrin repeats (3 copies);; Ankyrin repeat;; Ankyrin repeats (many copies);; Ankyrin repeat	Ankyrin repeat-containing protein At2g01680 GN=At2g01680 OS=Arabidopsis thaliana (Mouse-ear cress) PE=2 SV=1	R	General function prediction only	uncharacterized protein LOC100242500 [Vitis vinifera]
F01_c11315/f1p7/3414	--	--	Molecular Function: nucleotide binding (GO:0000166);; Molecular Function: nucleic acid binding (GO:0003676);; Molecular Function: zinc ion binding (GO:0008270);;	K13094|0|vvi:100250662|RNA-binding protein 5-B; K13094 RNA-binding protein 5/10 (A)	[R]	General function prediction only	G-patch domain;; DExH-box splicing factor binding site	Serine/arginine-rich splicing factor SC35 GN=SC35 OS=Arabidopsis thaliana (Mouse-ear cress) PE=1 SV=1	R	General function prediction only	PREDICTED: RNA-binding protein 5-B isoform X1 [Vitis vinifera]
F01_c5179/f1p2/1218	[C]	Energy production and conversion	Molecular Function: magnesium ion binding (GO:0000287);; Molecular Function: isocitrate dehydrogenase (NADP+) activity (GO:0004450);; Molecular Function: copper ion binding (GO:0005507);; Cellular Component: peroxisome (GO:0005777);; Cellular Component: plasma membrane (GO:0005886);; Biological Process: tricarboxylic acid cycle (GO:0006099);; Biological Process: isocitrate metabolic process (GO:0…	K00031|0|pop:POPTR_0004s07320g|POPTRDRAFT_648243; isocitrate dehydrogenase family protein; K00031 isocitrate dehydrogenase [EC:1.1.1.42] (A)	[C]	Energy production and conversion	Isocitrate/isopropylmalate dehydrogenase	Isocitrate dehydrogenase [NADP] OS=Nicotiana tabacum (Common tobacco) PE=2 SV=1	C	Energy production and conversion	isocitrate dehydrogenase family protein [Populus trichocarpa]
F01_c13477/f1p0/1290	[G]	Carbohydrate transport and metabolism	Molecular Function: aldose 1-epimerase activity (GO:0004034);; Biological Process: hexose metabolic process (GO:0019318);; Molecular Function: carbohydrate binding (GO:0030246);;	K01785|1.5394e-161|pxb:103938744|aldose 1-epimerase; K01785 aldose 1-epimerase [EC:5.1.3.3] (A)	[G]	Carbohydrate transport and metabolism	Aldose 1-epimerase	--	G	Carbohydrate transport and metabolism	PREDICTED: aldose 1-epimerase [Pyrus x bretschneideri]
F01_c22139/f4p2/3609	[R]	General function prediction only	--	K14005|0|vvi:100263684|protein transport protein SEC31 homolog B; K14005 protein transport protein SEC31 (A)	[U]	Intracellular trafficking, secretion, and vesicular transport	Steroid receptor RNA activator (SRA1)	Protein transport protein SEC31 homolog B {ECO:0000305} OS=Arabidopsis thaliana (Mouse-ear cress) PE=1 SV=1	U	Intracellular trafficking, secretion, and vesicular transport	PREDICTED: protein transport protein SEC31 homolog B isoform X2 [Vitis vinifera]
F01_c7561/f1p0/2147	--	--	Molecular Function: binding (GO:0005488);;	--	--	--	--	--	R	General function prediction only	PREDICTED: uncharacterized protein LOC101219957 [Cucumis sativus]
F01_c12634/f1p0/1951	--	--	Cellular Component: nucleus (GO:0005634);; Cellular Component: plasma membrane (GO:0005886);; Molecular Function: zinc ion binding (GO:0008270);;	--	[O]	Posttranslational modification, protein turnover, chaperones	--	E3 ubiquitin-protein ligase At4g11680 GN=At4g11680 OS=Arabidopsis thaliana (Mouse-ear cress) PE=2 SV=1	O	Posttranslational modification, protein turnover, chaperones	E3 ubiquitin-protein ligase [Morus notabilis]
F01_c16195/f1p4/1237	[G]	Carbohydrate transport and metabolism	Molecular Function: fructose-bisphosphate aldolase activity (GO:0004332);; Biological Process: glycolytic process (GO:0006096);;	K01623|0|cit:102610293|fructose-bisphosphate aldolase cytoplasmic isozyme-like; K01623 fructose-bisphosphate aldolase, class I [EC:4.1.2.13] (A)	[G]	Carbohydrate transport and metabolism	Fructose-bisphosphate aldolase class-I	Fructose-bisphosphate aldolase cytoplasmic isozyme OS=Oryza sativa subsp. japonica (Rice) PE=1 SV=2	G	Carbohydrate transport and metabolism	hypothetical protein MIMGU_mgv1a007931mg [Erythranthe guttata]
F01_c3506/f2p0/3575	--	--	--	--	--	--	--	--	--	--	hypothetical protein PRUPE_ppa016496mg, partial [Prunus persica]
F01_c2950/f4p9/1158	--	--	Cellular Component: chloroplast thylakoid membrane (GO:0009535);; Biological Process: photosynthesis, light harvesting (GO:0009765);; Cellular Component: plastoglobule (GO:0010287);; Molecular Function: chlorophyll binding (GO:0016168);; Biological Process: cysteine biosynthetic process (GO:0019344);; Cellular Component: light-harvesting complex (GO:0030076);; Molecular Function: metal ion bindin…	K08909|4.29458e-156|mdm:103405098|chlorophyll a-b binding protein 8, chloroplastic; K08909 light-harvesting complex I chlorophyll a/b binding protein 3 (A)	--	--	Chlorophyll A-B binding protein	Chlorophyll a-b binding protein 8, chloroplastic (Precursor) GN=CAB8 OS=Solanum lycopersicum (Tomato) PE=3 SV=1	R	General function prediction only	PREDICTED: chlorophyll a-b binding protein 8, chloroplastic [Malus domestica]
F01_c7088/f1p1/3442	[P]	Inorganic ion transport and metabolism	Molecular Function: nucleotide binding (GO:0000166);; Biological Process: ion transport (GO:0006811);; Cellular Component: membrane (GO:0016020);; Molecular Function: substrate-specific transporter activity (GO:0022892);; Molecular Function: ATPase activity, coupled to movement of substances (GO:0043492);; Molecular Function: metal ion binding (GO:0046872);;	K01530|0|pop:POPTR_0012s05450g|POPTRDRAFT_421641; hypothetical protein; K01530 phospholipid-translocating ATPase [EC:3.6.3.1] (A)	[R]	General function prediction only	Putative hydrolase of sodium-potassium ATPase alpha subunit	Phospholipid-transporting ATPase 10 GN=ALA10 OS=Arabidopsis thaliana (Mouse-ear cress) PE=3 SV=1	P	Inorganic ion transport and metabolism	putative phospholipid-transporting ATPase 12 family protein [Populus trichocarpa]
F01_c5374/f2p5/2406	--	--	Cellular Component: plasma membrane (GO:0005886);; Biological Process: intracellular protein transport (GO:0006886);; Cellular Component: chloroplast (GO:0009507);; Biological Process: vesicle-mediated transport (GO:0016192);; Cellular Component: clathrin adaptor complex (GO:0030131);;	--	[D]	Cell cycle control, cell division, chromosome partitioning	Muniscin C-terminal mu homology domain;; Adaptor complexes medium subunit family	--	D	Cell cycle control, cell division, chromosome partitioning	hypothetical protein M569_14155, partial [Genlisea aurea]
F01_c4278/f1p1/1460	--	--	Molecular Function: ATP binding (GO:0005524);;	K14399|0|cam:101492204|uncharacterized LOC101492204; K14399 polyribonucleotide 5'-hydroxyl-kinase [EC:2.7.1.78] (A)	[A]	RNA processing and modification	Pre-mRNA cleavage complex II protein Clp1;; Molybdopterin guanine dinucleotide synthesis protein B	Protein CLP1 homolog {ECO:0000255|HAMAP-Rule:MF_03035} GN=CLPS3 OS=Arabidopsis thaliana (Mouse-ear cress) PE=1 SV=1	A	RNA processing and modification	PREDICTED: protein CLP1 homolog [Nelumbo nucifera]
F01_c1678/f6p4/2524	--	--	Biological Process: protein glycosylation (GO:0006486);; Biological Process: protein targeting to vacuole (GO:0006623);; Biological Process: vesicle-mediated transport (GO:0016192);;	--	[Z]	Cytoskeleton	CTLH/CRA C-terminal to LisH motif domain	--	Z	Cytoskeleton	PREDICTED: uncharacterized protein LOC100244129 isoform X1 [Vitis vinifera]
F01_c5546/f1p2/2087	[T]	Signal transduction mechanisms	Molecular Function: protein serine/threonine phosphatase activity (GO:0004722);; Biological Process: protein dephosphorylation (GO:0006470);; Molecular Function: metal ion binding (GO:0046872);;	K01102|7.60098e-176|vvi:100241474|probable protein phosphatase 2C 38; K01102 pyruvate dehydrogenase phosphatase [EC:3.1.3.43] (A)	[T]	Signal transduction mechanisms	Protein phosphatase 2C;; Protein phosphatase 2C	Probable protein phosphatase 2C 38 GN=At3g12620 OS=Arabidopsis thaliana (Mouse-ear cress) PE=2 SV=1	T	Signal transduction mechanisms	PREDICTED: probable protein phosphatase 2C 38 [Vitis vinifera]
F01_c10544/f1p1/1560	[I]	Lipid transport and metabolism	Molecular Function: acetyl-CoA C-acyltransferase activity (GO:0003988);; Cellular Component: nucleolus (GO:0005730);; Cellular Component: mitochondrion (GO:0005739);; Cellular Component: vacuolar membrane (GO:0005774);; Cellular Component: peroxisome (GO:0005777);; Cellular Component: cytosol (GO:0005829);; Biological Process: fatty acid beta-oxidation (GO:0006635);; Biological Process: toxin cat…	K07513|0|vvi:100247651|3-ketoacyl-CoA thiolase 2, peroxisomal; K07513 acetyl-CoA acyltransferase 1 [EC:2.3.1.16] (A)	[I]	Lipid transport and metabolism	Thiolase, N-terminal domain;; Thiolase, C-terminal domain	3-ketoacyl-CoA thiolase 2, peroxisomal (Precursor) GN=F25I18.11 OS=Arabidopsis thaliana (Mouse-ear cress) PE=1 SV=2	I	Lipid transport and metabolism	hypothetical protein VITISV_023191 [Vitis vinifera]
F01_c18948/f27p44/1661	[C]	Energy production and conversion	Molecular Function: copper ion binding (GO:0005507);; Molecular Function: ATP binding (GO:0005524);; Cellular Component: cell wall (GO:0005618);; Cellular Component: nucleolus (GO:0005730);; Cellular Component: mitochondrial inner membrane (GO:0005743);; Cellular Component: vacuole (GO:0005773);; Cellular Component: plasma membrane (GO:0005886);; Biological Process: response to oxidative stress (…	K02132|0|rcu:RCOM_Mp35|atp1; ATP synthase F1 subunit 1; K02132 F-type H+-transporting ATPase subunit alpha (A)	[C]	Energy production and conversion	ATP synthase alpha/beta family, nucleotide-binding domain;; ATP synthase alpha/beta chain, C terminal domain;; ATP synthase alpha/beta family, beta-barrel domain;; HAS barrel domain	ATP synthase subunit alpha, mitochondrial GN=ATPA OS=Oryza sativa subsp. japonica (Rice) PE=1 SV=1	C	Energy production and conversion	ATPase subunit 1 [Citrullus lanatus]
F01_c19417/f3p1/1840	[Q]	Secondary metabolites biosynthesis, transport and catabolism	Molecular Function: monooxygenase activity (GO:0004497);; Molecular Function: iron ion binding (GO:0005506);; Molecular Function: electron carrier activity (GO:0009055);; Molecular Function: oxidoreductase activity, acting on paired donors, with incorporation or reduction of molecular oxygen (GO:0016705);; Molecular Function: heme binding (GO:0020037);; Biological Process: oxidation-reduction pro…	K00487|0|fve:101294342|trans-cinnamate 4-monooxygenase-like; K00487 trans-cinnamate 4-monooxygenase [EC:1.14.13.11] (A)	[Q]	Secondary metabolites biosynthesis, transport and catabolism	Cytochrome P450	Trans-cinnamate 4-monooxygenase GN=CYP73A4 OS=Catharanthus roseus (Madagascar periwinkle) PE=2 SV=1	Q	Secondary metabolites biosynthesis, transport and catabolism	cinnamate 4-hydroxylase [Paeonia lactiflora]
F01_c12010/f1p4/1255	[H]	Coenzyme transport and metabolism	Molecular Function: adenosylhomocysteinase activity (GO:0004013);; Biological Process: one-carbon metabolic process (GO:0006730);; Biological Process: response to stress (GO:0006950);;	K01251|0|gmx:100786939|adenosylhomocysteinase-like; K01251 adenosylhomocysteinase [EC:3.3.1.1] (A)	[H]	Coenzyme transport and metabolism	S-adenosyl-L-homocysteine hydrolase, NAD binding domain;; S-adenosyl-L-homocysteine hydrolase;; D-isomer specific 2-hydroxyacid dehydrogenase, NAD binding domain;; Acetohydroxy acid isomeroreductase, catalytic domain;; Tetrahydrofolate dehydrogenase/cyclohydrolase, NAD(P)-binding domain	Adenosylhomocysteinase GN=SAHH OS=Catharanthus roseus (Madagascar periwinkle) PE=2 SV=1	H	Coenzyme transport and metabolism	PREDICTED: adenosylhomocysteinase-like [Populus euphratica]
F01_c14875/f1p6/4380	[D]	Cell cycle control, cell division, chromosome partitioning	Molecular Function: ATP binding (GO:0005524);; Cellular Component: nucleus (GO:0005634);; Cellular Component: chromosome (GO:0005694);; Biological Process: DNA repair (GO:0006281);; Biological Process: DNA recombination (GO:0006310);; Biological Process: sister chromatid cohesion (GO:0007062);; Biological Process: chromosome condensation (GO:0030261);;	K06636|0|cit:102614736|structural maintenance of chromosomes protein 1-like; K06636 structural maintenance of chromosome 1 (A)	[D]	Cell cycle control, cell division, chromosome partitioning	RecF/RecN/SMC N terminal domain;; AAA domain;; AAA domain;; P-loop containing region of AAA domain;; ABC transporter	Structural maintenance of chromosomes protein 1 GN=T5N23.30 OS=Arabidopsis thaliana (Mouse-ear cress) PE=2 SV=2	D	Cell cycle control, cell division, chromosome partitioning	PREDICTED: structural maintenance of chromosomes protein 1 [Vitis vinifera]
F01_c16240/f1p1/1114	[Q]	Secondary metabolites biosynthesis, transport and catabolism	Molecular Function: copper ion binding (GO:0005507);; Biological Process: lignin catabolic process (GO:0046274);; Cellular Component: apoplast (GO:0048046);; Molecular Function: hydroquinone:oxygen oxidoreductase activity (GO:0052716);; Biological Process: oxidation-reduction process (GO:0055114);;	--	[Q]	Secondary metabolites biosynthesis, transport and catabolism	Multicopper oxidase	Laccase-3 (Precursor) GN=B1088C09.5 OS=Oryza sativa subsp. japonica (Rice) PE=2 SV=1	Q	Secondary metabolites biosynthesis, transport and catabolism	PREDICTED: laccase-14-like [Sesamum indicum]
F01_c5801/f1p0/1194	[RTKL]	--	--	--	[R]	General function prediction only	Protein kinase domain;; Protein tyrosine kinase	Probable serine/threonine protein kinase IRE3 {ECO:0000305} OS=Arabidopsis thaliana (Mouse-ear cress) PE=2 SV=1	T	Signal transduction mechanisms	PREDICTED: serine/threonine-protein kinase 38-like [Nelumbo nucifera]
F01_c11771/f2p0/1366	--	--	Molecular Function: zinc ion binding (GO:0008270);; Cellular Component: membrane (GO:0016020);; Biological Process: metal ion transport (GO:0030001);; Molecular Function: metal ion transmembrane transporter activity (GO:0046873);; Biological Process: transmembrane transport (GO:0055085);;	K11982|4.73034e-137|vvi:100265659|E3 ubiquitin-protein ligase RING1; K11982 E3 ubiquitin-protein ligase RNF115/126 [EC:6.3.2.19] (A)	[O]	Posttranslational modification, protein turnover, chaperones	Protein of unknown function (DUF1117);; zinc-finger;; Ring finger domain;; Zinc finger, C3HC4 type (RING finger)	E3 ubiquitin-protein ligase RING1-like GN=At3g19950 OS=Arabidopsis thaliana (Mouse-ear cress) PE=1 SV=1	O	Posttranslational modification, protein turnover, chaperones	PREDICTED: E3 ubiquitin-protein ligase RING1 [Vitis vinifera]
F01_c5151/f1p2/2647	--	--	Cellular Component: endosome (GO:0005768);; Cellular Component: trans-Golgi network (GO:0005802);; Biological Process: regulation of meristem growth (GO:0010075);; Biological Process: homogalacturonan biosynthetic process (GO:0010289);; Molecular Function: polygalacturonate 4-alpha-galacturonosyltransferase activity (GO:0047262);;	K13648|0|mdm:103405701|polygalacturonate 4-alpha-galacturonosyltransferase; K13648 alpha-1,4-galacturonosyltransferase [EC:2.4.1.43] (A)	--	--	Glycosyl transferase family 8	Polygalacturonate 4-alpha-galacturonosyltransferase GN=T20K12.30 OS=Arabidopsis thaliana (Mouse-ear cress) PE=1 SV=1	G	Carbohydrate transport and metabolism	PREDICTED: polygalacturonate 4-alpha-galacturonosyltransferase [Vitis vinifera]
F01_c14491/f1p0/2812	--	--	Molecular Function: catalytic activity (GO:0003824);; Biological Process: cellular process (GO:0009987);; Molecular Function: organic cyclic compound binding (GO:0097159);; Molecular Function: heterocyclic compound binding (GO:1901363);;	--	[R]	General function prediction only	--	--	R	General function prediction only	PREDICTED: uncharacterized protein LOC103449768 [Malus domestica]
F01_c3174/f2p0/2145	[RTKL]	--	Molecular Function: protein kinase activity (GO:0004672);;	--	--	--	Protein kinase domain;; Protein tyrosine kinase;; Salt stress response/antifungal	Cysteine-rich receptor-like protein kinase 10 (Precursor) GN=F21P8.70 OS=Arabidopsis thaliana (Mouse-ear cress) PE=1 SV=3	T	Signal transduction mechanisms	PREDICTED: cysteine-rich receptor-like protein kinase 10 [Vitis vinifera]
F01_c603/f1p15/968	--	--	Biological Process: cellular process (GO:0009987);; Biological Process: single-organism transport (GO:0044765);; Molecular Function: metal ion binding (GO:0046872);;	--	[R]	General function prediction only	--	Zinc finger CCCH domain-containing protein 33 GN=OSJNBa0056I11.7 OS=Oryza sativa subsp. japonica (Rice) PE=2 SV=1	R	General function prediction only	transcription factor, putative [Ricinus communis]
F01_c2496/f3p3/3323	--	--	--	--	--	--	MATH domain	MATH domain-containing protein At5g43560 GN=At5g43560 OS=Arabidopsis thaliana (Mouse-ear cress) PE=1 SV=1	S	Function unknown	PREDICTED: MATH domain-containing protein At5g43560-like [Nelumbo nucifera]
F01_c916/f1p3/801	[I]	Lipid transport and metabolism	Biological Process: metabolic process (GO:0008152);; Molecular Function: hydrolase activity (GO:0016787);;	--	[V]	Defense mechanisms	alpha/beta hydrolase fold	Probable carboxylesterase 2 GN=CXE2 OS=Arabidopsis thaliana (Mouse-ear cress) PE=2 SV=1	V	Defense mechanisms	CXE carboxylesterase [Paeonia suffruticosa]
F01_c2545/f4p3/1304	[R]	General function prediction only	Molecular Function: chitinase activity (GO:0004568);; Biological Process: carbohydrate metabolic process (GO:0005975);; Biological Process: chitin catabolic process (GO:0006032);; Biological Process: cell wall macromolecule catabolic process (GO:0016998);;	--	[R]	General function prediction only	Chitinase class I	Chitinase-like protein 1 (Precursor) GN=At1g05850 OS=Arabidopsis thaliana (Mouse-ear cress) PE=1 SV=1	R	General function prediction only	chitodextrinase [Eucommia ulmoides]
F01_c5404/f2p0/1328	--	--	--	--	--	--	--	--	S	Function unknown	PREDICTED: uncharacterized protein LOC100259819 [Vitis vinifera]
F01_c14968/f1p0/1978	[QR]	--	Molecular Function: histone-arginine N-methyltransferase activity (GO:0008469);; Biological Process: histone arginine methylation (GO:0034969);;	K05931|7.01882e-152|rcu:RCOM_0681060|protein arginine n-methyltransferase, putative (EC:2.1.1.125); K05931 histone-arginine methyltransferase CARM1 [EC:2.1.1.125] (A)	[OK]	--	Ribosomal protein L11 methyltransferase (PrmA)	Probable histone-arginine methyltransferase 1.4 GN=K19E20.17 OS=Arabidopsis thaliana (Mouse-ear cress) PE=1 SV=1	K	Transcription	PREDICTED: probable histone-arginine methyltransferase 1.3 isoform X2 [Nicotiana tomentosiformis]
F01_c6073/f1p0/3694	--	--	--	K01490|0|vvi:100265525|probable AMP deaminase; K01490 AMP deaminase [EC:3.5.4.6] (A)	[F]	Nucleotide transport and metabolism	Adenosine/AMP deaminase	Probable AMP deaminase GN=P0034A04.129 OS=Oryza sativa subsp. japonica (Rice) PE=2 SV=1	F	Nucleotide transport and metabolism	PREDICTED: probable AMP deaminase isoform X1 [Vitis vinifera]
F01_c11850/f2p0/1970	--	--	Biological Process: sulfur amino acid metabolic process (GO:0000096);; Biological Process: MAPK cascade (GO:0000165);; Molecular Function: monooxygenase activity (GO:0004497);; Molecular Function: iron ion binding (GO:0005506);; Cellular Component: mitochondrion (GO:0005739);; Biological Process: glycine catabolic process (GO:0006546);; Biological Process: tryptophan catabolic process (GO:0006569…	K01723|0|vvi:100267750|allene oxide synthase; K01723 hydroperoxide dehydratase [EC:4.2.1.92] (A)	--	--	Cytochrome P450	Allene oxide synthase, chloroplastic (Precursor) GN=CYP74A OS=Linum usitatissimum (Flax) PE=1 SV=1	Q	Secondary metabolites biosynthesis, transport and catabolism	PREDICTED: allene oxide synthase [Vitis vinifera]
F01_c16149/f2p39/1201	[E]	Amino acid transport and metabolism	Molecular Function: glycine dehydrogenase (decarboxylating) activity (GO:0004375);; Biological Process: glycine catabolic process (GO:0006546);; Molecular Function: pyridoxal phosphate binding (GO:0030170);; Molecular Function: 2-alkenal reductase [NAD(P)] activity (GO:0032440);; Biological Process: oxidation-reduction process (GO:0055114);;	K00281|0|vvi:100266170|glycine dehydrogenase (decarboxylating), mitochondrial; K00281 glycine dehydrogenase [EC:1.4.4.2] (A)	[E]	Amino acid transport and metabolism	Glycine cleavage system P-protein	Glycine dehydrogenase (decarboxylating), mitochondrial (Precursor) GN=GDCSP OS=Solanum tuberosum (Potato) PE=2 SV=1	E	Amino acid transport and metabolism	hypothetical protein VITISV_032016 [Vitis vinifera]
F01_c1459/f9p15/2224	--	--	Molecular Function: transporter activity (GO:0005215);; Cellular Component: membrane (GO:0016020);; Biological Process: transmembrane transport (GO:0055085);;	--	[F]	Nucleotide transport and metabolism	Permease family	Nucleobase-ascorbate transporter 6 GN=NAT6 OS=Arabidopsis thaliana (Mouse-ear cress) PE=2 SV=2	P	Inorganic ion transport and metabolism	Nucleobase-ascorbate transporter 6 -like protein [Gossypium arboreum]
F01_c8417/f2p1/3629	[D]	Cell cycle control, cell division, chromosome partitioning	Biological Process: double-strand break repair via homologous recombination (GO:0000724);; Molecular Function: ATP binding (GO:0005524);; Cellular Component: Smc5-Smc6 complex (GO:0030915);; Biological Process: chromosome organization (GO:0051276);;	--	[L]	Replication, recombination and repair	RecF/RecN/SMC N terminal domain;; AAA domain	Structural maintenance of chromosomes protein 6B GN=MCI2.2 OS=Arabidopsis thaliana (Mouse-ear cress) PE=2 SV=1	L	Replication, recombination and repair	PREDICTED: structural maintenance of chromosomes protein 6B-like [Vitis vinifera]
F01_c15473/f1p0/2512	--	--	Biological Process: embryo development ending in seed dormancy (GO:0009793);;	--	[S]	Function unknown	--	TATA box-binding protein-associated factor RNA polymerase I subunit B GN=T17M13 OS=Arabidopsis thaliana (Mouse-ear cress) PE=1 SV=1	K	Transcription	hypothetical protein PRUPE_ppa023055mg, partial [Prunus persica]
F01_c12795/f1p0/2137	[RTKL]	--	Molecular Function: protein serine/threonine kinase activity (GO:0004674);; Molecular Function: protein tyrosine kinase activity (GO:0004713);; Molecular Function: ATP binding (GO:0005524);; Cellular Component: nucleus (GO:0005634);; Cellular Component: cytoplasm (GO:0005737);; Biological Process: protein phosphorylation (GO:0006468);; Biological Process: protein N-linked glycosylation (GO:000648…	K08829|4.93557e-39|pxb:103955563|cyclin-dependent kinase F-4; K08829 male germ cell-associated kinase [EC:2.7.11.22] (A)	[T]	Signal transduction mechanisms	Protein kinase domain;; Protein tyrosine kinase	Cyclin-dependent kinase F-4 OS=Oryza sativa subsp. japonica (Rice) PE=2 SV=1	T	Signal transduction mechanisms	PREDICTED: cyclin-dependent kinase F-4-like isoform X2 [Glycine max]
F01_c931/f1p4/979	[P]	Inorganic ion transport and metabolism	Cellular Component: cytosol (GO:0005829);; Biological Process: protein folding (GO:0006457);; Biological Process: response to heat (GO:0009408);; Biological Process: response to high light intensity (GO:0009644);; Molecular Function: L-ascorbate peroxidase activity (GO:0016688);; Molecular Function: heme binding (GO:0020037);; Biological Process: response to hydrogen peroxide (GO:0042542);; Biolo…	K00434|2.66953e-111|vvi:100233048|APX; cytosolic ascorbate peroxidase; K00434 L-ascorbate peroxidase [EC:1.11.1.11] (A)	--	--	Peroxidase	L-ascorbate peroxidase, cytosolic GN=APX1 OS=Pisum sativum (Garden pea) PE=1 SV=2	R	General function prediction only	PREDICTED: L-ascorbate peroxidase, cytosolic [Eucalyptus grandis]
F01_c8241/f4p2/2132	[H]	Coenzyme transport and metabolism	Molecular Function: nicotinate-nucleotide diphosphorylase (carboxylating) activity (GO:0004514);; Molecular Function: nicotinate phosphoribosyltransferase activity (GO:0004516);; Biological Process: NAD biosynthetic process (GO:0009435);; Biological Process: nicotinate nucleotide salvage (GO:0019358);;	K00763|0|vvi:100249147|nicotinate phosphoribosyltransferase; K00763 nicotinate phosphoribosyltransferase [EC:6.3.4.21] (A)	[H]	Coenzyme transport and metabolism	Nicotinate phosphoribosyltransferase (NAPRTase) family	--	H	Coenzyme transport and metabolism	PREDICTED: nicotinate phosphoribosyltransferase isoform X2 [Vitis vinifera]
F01_c21282/f2p10/3228	[O]	Posttranslational modification, protein turnover, chaperones	Molecular Function: ATP binding (GO:0005524);; Cellular Component: plasma membrane (GO:0005886);; Biological Process: response to stress (GO:0006950);; Cellular Component: chloroplast (GO:0009507);; Molecular Function: 2-alkenal reductase [NAD(P)] activity (GO:0032440);; Biological Process: oxidation-reduction process (GO:0055114);;	K09486|0|pper:PRUPE_ppa001147mg|hypothetical protein; K09486 hypoxia up-regulated 1 (A)	[O]	Posttranslational modification, protein turnover, chaperones	Hsp70 protein	Heat shock 70 kDa protein 17 (Precursor) OS=Arabidopsis thaliana (Mouse-ear cress) PE=1 SV=1	O	Posttranslational modification, protein turnover, chaperones	hypothetical protein PRUPE_ppa001147mg [Prunus persica]
F01_c14725/f1p2/1651	[J]	Translation, ribosomal structure and biogenesis	Biological Process: RNA methylation (GO:0001510);; Biological Process: pseudouridine synthesis (GO:0001522);; Molecular Function: RNA binding (GO:0003723);; Cellular Component: nucleolus (GO:0005730);; Cellular Component: cytosol (GO:0005829);; Biological Process: purine nucleotide biosynthetic process (GO:0006164);; Biological Process: RNA processing (GO:0006396);; Cellular Component: plasmodesm…	K11131|0|vvi:100258019|H/ACA ribonucleoprotein complex subunit 4; K11131 H/ACA ribonucleoprotein complex subunit 4 [EC:5.4.99.-] (A)	[J]	Translation, ribosomal structure and biogenesis	PUA domain	H/ACA ribonucleoprotein complex subunit 4 GN=F24I3.230 OS=Arabidopsis thaliana (Mouse-ear cress) PE=1 SV=1	J	Translation, ribosomal structure and biogenesis	PREDICTED: H/ACA ribonucleoprotein complex subunit 4 [Vitis vinifera]
F01_c2928/f4p4/1276	--	--	--	--	[S]	Function unknown	Rtf2 RING-finger	--	S	Function unknown	PREDICTED: protein RTF2 homolog [Vitis vinifera]
F01_c11647/f2p2/1494	[E]	Amino acid transport and metabolism	Molecular Function: L-tyrosine:2-oxoglutarate aminotransferase activity (GO:0004838);; Biological Process: cellular amino acid metabolic process (GO:0006520);; Biological Process: iron ion transport (GO:0006826);; Cellular Component: plastid (GO:0009536);; Biological Process: vitamin E biosynthetic process (GO:0010189);; Molecular Function: pyridoxal phosphate binding (GO:0030170);; Molecular Fun…	K00815|7.50055e-168|pper:PRUPE_ppa006368mg|hypothetical protein; K00815 tyrosine aminotransferase [EC:2.6.1.5] (A)	[E]	Amino acid transport and metabolism	Aminotransferase class I and II	Probable aminotransferase TAT2 GN=At5g53970 OS=Arabidopsis thaliana (Mouse-ear cress) PE=2 SV=1	E	Amino acid transport and metabolism	hypothetical protein PRUPE_ppa006368mg [Prunus persica]
F01_c1741/f1p2/944	[R]	General function prediction only	Molecular Function: acid phosphatase activity (GO:0003993);; Molecular Function: metal ion binding (GO:0046872);;	--	[G]	Carbohydrate transport and metabolism	Iron/zinc purple acid phosphatase-like protein C;; Calcineurin-like phosphoesterase	Purple acid phosphatase 18 (Precursor) GN=K10D20.4 OS=Arabidopsis thaliana (Mouse-ear cress) PE=2 SV=1	G	Carbohydrate transport and metabolism	PREDICTED: purple acid phosphatase 18 [Prunus mume]
F01_c13732/f1p1/1296	--	--	Biological Process: RNA splicing, via endonucleolytic cleavage and ligation (GO:0000394);; Molecular Function: DNA binding (GO:0003677);; Molecular Function: sequence-specific DNA binding transcription factor activity (GO:0003700);; Cellular Component: nuclear euchromatin (GO:0005719);; Biological Process: DNA methylation (GO:0006306);; Biological Process: methylation-dependent chromatin silencin…	K09272|7.8076e-142|csv:101222581|FACT complex subunit SSRP1-like; K09272 structure-specific recognition protein 1 (A)	[KLB]	--	Structure-specific recognition protein (SSRP1)	FACT complex subunit SSRP1 GN=SSRP1 OS=Catharanthus roseus (Madagascar periwinkle) PE=2 SV=1	K	Transcription	PREDICTED: FACT complex subunit SSRP1-like [Cucumis sativus]
F01_c10355/f2p1/1126	[P]	Inorganic ion transport and metabolism	Biological Process: phosphate ion transport (GO:0006817);; Biological Process: galactolipid biosynthetic process (GO:0019375);; Biological Process: negative regulation of transcription, DNA-templated (GO:0045892);;	--	[P]	Inorganic ion transport and metabolism	SPX domain	SPX domain-containing protein 1 GN=SPX1 OS=Arabidopsis thaliana (Mouse-ear cress) PE=2 SV=2	P	Inorganic ion transport and metabolism	PREDICTED: SPX domain-containing protein 1 [Vitis vinifera]
F01_c3613/f1p0/1157	[O]	Posttranslational modification, protein turnover, chaperones	Molecular Function: metalloendopeptidase activity (GO:0004222);; Molecular Function: ATP binding (GO:0005524);; Biological Process: proteolysis (GO:0006508);; Molecular Function: zinc ion binding (GO:0008270);; Cellular Component: integral component of membrane (GO:0016021);; Molecular Function: nucleoside-triphosphatase activity (GO:0017111);; Biological Process: protein catabolic process (GO:00…	K03798|6.30984e-133|pop:POPTR_0002s22560g|hypothetical protein; K03798 cell division protease FtsH [EC:3.4.24.-] (A)	[O]	Posttranslational modification, protein turnover, chaperones	Peptidase family M41	ATP-dependent zinc metalloprotease FTSH 2, chloroplastic (Precursor) OS=Oryza sativa subsp. japonica (Rice) PE=3 SV=1	O	Posttranslational modification, protein turnover, chaperones	hypothetical protein POPTR_0002s22560g [Populus trichocarpa]
F01_c2583/f2p2/3298	[V]	Defense mechanisms	Biological Process: polysaccharide biosynthetic process (GO:0000271);; Molecular Function: ATP binding (GO:0005524);; Cellular Component: plasma membrane (GO:0005886);; Biological Process: ATP catabolic process (GO:0006200);; Biological Process: pattern specification process (GO:0007389);; Biological Process: regulation of cell size (GO:0008361);; Molecular Function: xenobiotic-transporting ATPas…	K05658|0|rcu:RCOM_0855230|multidrug resistance protein 1, 2, putative (EC:3.6.3.44); K05658 ATP-binding cassette, subfamily B (MDR/TAP), member 1 [EC:3.6.3.44] (A)	[Q]	Secondary metabolites biosynthesis, transport and catabolism	ABC transporter transmembrane region	ABC transporter B family member 19 GN=MLD15.2 OS=Arabidopsis thaliana (Mouse-ear cress) PE=1 SV=1	Q	Secondary metabolites biosynthesis, transport and catabolism	hypothetical protein JCGZ_09747 [Jatropha curcas]
F01_c5849/f1p3/2024	[E]	Amino acid transport and metabolism	Molecular Function: transporter activity (GO:0005215);; Biological Process: transport (GO:0006810);; Cellular Component: membrane (GO:0016020);;	K14638|0|vvi:100263850|uncharacterized LOC100263850 (A)	[E]	Amino acid transport and metabolism	POT family	Protein NRT1/ PTR FAMILY 2.11 GN=MRG21.10 OS=Arabidopsis thaliana (Mouse-ear cress) PE=1 SV=1	P	Inorganic ion transport and metabolism	unnamed protein product [Coffea canephora]
F01_c2671/f4p3/1093	--	--	--	--	--	--	--	--	S	Function unknown	Uncharacterized protein isoform 2 [Theobroma cacao]
F01_c16150/f2p1/2522	[G]	Carbohydrate transport and metabolism	Biological Process: carbohydrate metabolic process (GO:0005975);; Molecular Function: beta-glucosidase activity (GO:0008422);;	K05349|0|cit:102619134|lysosomal beta glucosidase-like; K05349 beta-glucosidase [EC:3.2.1.21] (A)	--	--	Glycosyl hydrolase family 3 N terminal domain;; Glycosyl hydrolase family 3 C-terminal domain	Alpha-L-arabinofuranosidase (Precursor) OS=Medicago sativa subsp. varia (Alfalfa) PE=2 SV=1	G	Carbohydrate transport and metabolism	hypothetical protein JCGZ_12843 [Jatropha curcas]
F01_c4975/f1p0/3594	--	--	--	K01962|4.53023e-07|cit:102608822|acetyl-coenzyme A carboxylase carboxyl transferase subunit alpha, chloroplastic-like; K01962 acetyl-CoA carboxylase carboxyl transferase subunit alpha [EC:6.4.1.2] (A)	--	--	--	Acetyl-coenzyme A carboxylase carboxyl transferase subunit alpha, chloroplastic (Precursor) GN=CAC3 OS=Arabidopsis thaliana (Mouse-ear cress) PE=1 SV=1	I	Lipid transport and metabolism	hypothetical protein CISIN_1g004120mg [Citrus sinensis]
F01_c6417/f1p0/3338	--	--	--	--	[R]	General function prediction only	PPR repeat	Pentatricopeptide repeat-containing protein At3g02330 OS=Arabidopsis thaliana (Mouse-ear cress) PE=2 SV=2	R	General function prediction only	PREDICTED: pentatricopeptide repeat-containing protein At3g02330 [Malus domestica]
F01_c14632/f1p0/1156	[J]	Translation, ribosomal structure and biogenesis	Molecular Function: structural constituent of ribosome (GO:0003735);; Biological Process: translation (GO:0006412);; Cellular Component: chloroplast (GO:0009507);; Cellular Component: large ribosomal subunit (GO:0015934);; Molecular Function: transferase activity (GO:0016740);; Molecular Function: rRNA binding (GO:0019843);;	K02886|3.13458e-48|fve:101306104|50S ribosomal protein L2, chloroplastic-like; K02886 large subunit ribosomal protein L2 (A)	[J]	Translation, ribosomal structure and biogenesis	Ribosomal Proteins L2, RNA binding domain	50S ribosomal protein L2, chloroplastic GN=rpl2-B OS=Cucumis sativus (Cucumber) PE=3 SV=1	J	Translation, ribosomal structure and biogenesis	PREDICTED: 50S ribosomal protein L2, chloroplastic-like [Fragaria vesca subsp. vesca]
F01_c14375/f1p0/2242	[C]	Energy production and conversion	Biological Process: malate metabolic process (GO:0006108);; Molecular Function: L-malate dehydrogenase activity (GO:0030060);; Biological Process: cellular carbohydrate metabolic process (GO:0044262);; Biological Process: oxidation-reduction process (GO:0055114);;	K00026|2.74583e-14|rcu:RCOM_1471880|malate dehydrogenase, putative (EC:1.1.1.37); K00026 malate dehydrogenase [EC:1.1.1.37] (A)	[C]	Energy production and conversion	lactate/malate dehydrogenase, alpha/beta C-terminal domain	Malate dehydrogenase, chloroplastic (Precursor) GN=At3g47520 OS=Arabidopsis thaliana (Mouse-ear cress) PE=1 SV=1	C	Energy production and conversion	malate dehydrogenase, putative [Ricinus communis]
F01_c9563/f1p2/3492	[RTKL]	--	Molecular Function: protein kinase activity (GO:0004672);;	--	[T]	Signal transduction mechanisms	--	Serine/threonine-protein kinase HT1 GN=HT1 OS=Arabidopsis thaliana (Mouse-ear cress) PE=1 SV=1	T	Signal transduction mechanisms	predicted protein [Physcomitrella patens]
F01_c7951/f1p8/2392	[O]	Posttranslational modification, protein turnover, chaperones	--	--	[O]	Posttranslational modification, protein turnover, chaperones	AAA domain (Cdc48 subfamily)	--	O	Posttranslational modification, protein turnover, chaperones	PREDICTED: uncharacterized protein LOC100241532 [Vitis vinifera]
F01_c17031/f1p97/1285	--	--	Molecular Function: phosphopantetheine binding (GO:0031177);;	--	[T]	Signal transduction mechanisms	T-complex protein 11	--	T	Signal transduction mechanisms	PREDICTED: uncharacterized protein LOC100252816 isoform X2 [Vitis vinifera]
F01_c19796/f1p19/3242	--	--	--	--	--	--	--	Uncharacterized protein ORF91 OS=Phalaenopsis aphrodite subsp. formosana (Moth orchid) PE=4 SV=1	S	Function unknown	Mitochondrial protein, putative [Medicago truncatula]
F01_c19529/f1p11/1230	[R]	General function prediction only	Molecular Function: oxidoreductase activity (GO:0016491);; Biological Process: oxidation-reduction process (GO:0055114);;	--	[R]	General function prediction only	Aldo/keto reductase family	Methylecgonone reductase OS=Erythroxylum coca (Coca plant) PE=1 SV=1	R	General function prediction only	PREDICTED: methylecgonone reductase-like isoform X1 [Vitis vinifera]
F01_c7166/f1p1/2119	--	--	Molecular Function: DNA binding (GO:0003677);; Molecular Function: RNA binding (GO:0003723);; Molecular Function: RNA-directed DNA polymerase activity (GO:0003964);; Molecular Function: endonuclease activity (GO:0004519);; Cellular Component: intracellular (GO:0005622);; Biological Process: RNA-dependent DNA replication (GO:0006278);; Biological Process: DNA repair (GO:0006281);;	--	--	--	Frigida-like protein	Protein FRIGIDA GN=FRI OS=Arabidopsis thaliana (Mouse-ear cress) PE=1 SV=1	S	Function unknown	PREDICTED: protein FRIGIDA [Vitis vinifera]
F01_c13859/f1p2/2204	--	--	Molecular Function: transferase activity, transferring phosphorus-containing groups (GO:0016772);;	--	[T]	Signal transduction mechanisms	Phosphatidylinositol 3- and 4-kinase;; Ubiquitin family	Phosphatidylinositol 4-kinase gamma 4 GN=At2g46500 OS=Arabidopsis thaliana (Mouse-ear cress) PE=1 SV=1	O	Posttranslational modification, protein turnover, chaperones	hypothetical protein POPTR_0014s09450g [Populus trichocarpa]
F01_c12792/f1p0/2001	--	--	--	K14319|0|pvu:PHAVU_007G172200g|hypothetical protein; K14319 Ran GTPase-activating protein 1 (A)	[AYT]	--	Leucine Rich repeat;; Leucine Rich repeats (2 copies)	RAN GTPase-activating protein 2 GN=RANGAP2 OS=Arabidopsis thaliana (Mouse-ear cress) PE=1 SV=2	741	RAN GTPase-activating protein	hypothetical protein PHAVU_007G172200g [Phaseolus vulgaris]
F01_c13584/f1p0/1620	--	--	Molecular Function: oxidoreductase activity (GO:0016491);;	K00475|1.86882e-11|mtr:MTR_5g022020|Flavanone-3-hydroxylase; K00475 naringenin 3-dioxygenase [EC:1.14.11.9] (A)	[QR]	--	--	Naringenin,2-oxoglutarate 3-dioxygenase GN=F3H OS=Vitis vinifera (Grape) PE=2 SV=1	Q	Secondary metabolites biosynthesis, transport and catabolism	flavanone 3-hydroxylase [Eustoma grandiflorum]
F01_c1804/f7p4/3324	--	--	--	K11855|0|pmum:103325824|ubiquitin carboxyl-terminal hydrolase 15; K11855 ubiquitin carboxyl-terminal hydrolase 36/42 [EC:3.4.19.12] (A)	[O]	Posttranslational modification, protein turnover, chaperones	Ubiquitin carboxyl-terminal hydrolase;; Ubiquitin carboxyl-terminal hydrolase;; MYND finger	Ubiquitin carboxyl-terminal hydrolase 15 GN=UBP15 OS=Arabidopsis thaliana (Mouse-ear cress) PE=2 SV=2	O	Posttranslational modification, protein turnover, chaperones	PREDICTED: ubiquitin carboxyl-terminal hydrolase 15 [Vitis vinifera]
F01_c7763/f2p6/2512	--	--	--	--	[R]	General function prediction only	DBC1	--	R	General function prediction only	hypothetical protein PHAVU_003G045700g [Phaseolus vulgaris]
F01_c1827/f4p2/1142	--	--	Molecular Function: hydrolase activity, hydrolyzing O-glycosyl compounds (GO:0004553);; Cellular Component: cell wall (GO:0005618);; Biological Process: cellular glucan metabolic process (GO:0006073);; Molecular Function: xyloglucan:xyloglucosyl transferase activity (GO:0016762);; Cellular Component: apoplast (GO:0048046);;	K08235|1.96517e-146|pxb:103937524|probable xyloglucan endotransglucosylase/hydrolase protein 31; K08235 xyloglucan:xyloglucosyl transferase [EC:2.4.1.207] (A)	--	--	Glycosyl hydrolases family 16;; Xyloglucan endo-transglycosylase (XET) C-terminus	Probable xyloglucan endotransglucosylase/hydrolase protein 32 (Precursor) GN=XTH32 OS=Arabidopsis thaliana (Mouse-ear cress) PE=2 SV=1	G	Carbohydrate transport and metabolism	PREDICTED: probable xyloglucan endotransglucosylase/hydrolase protein 31 [Pyrus x bretschneideri]
F01_c9160/f1p1/2701	--	--	--	--	--	--	--	--	S	Function unknown	unnamed protein product [Vitis vinifera]
F01_c16185/f1p1/1860	--	--	--	--	[O]	Posttranslational modification, protein turnover, chaperones	Ring finger domain;; RING-H2 zinc finger;; Zinc finger, C3HC4 type (RING finger)	E3 ubiquitin-protein ligase At4g11680 GN=At4g11680 OS=Arabidopsis thaliana (Mouse-ear cress) PE=2 SV=1	O	Posttranslational modification, protein turnover, chaperones	hypothetical protein F383_26605 [Gossypium arboreum]
F01_c7743/f3p4/2124	[A]	RNA processing and modification	Molecular Function: RNA binding (GO:0003723);; Molecular Function: polynucleotide adenylyltransferase activity (GO:0004652);; Cellular Component: nucleus (GO:0005634);; Biological Process: RNA polyadenylation (GO:0043631);;	K14376|0|cit:102610335|poly(A) polymerase-like; K14376 poly(A) polymerase [EC:2.7.7.19] (A)	[A]	RNA processing and modification	Poly(A) polymerase central domain;; Poly(A) polymerase predicted RNA binding domain;; Nucleotidyltransferase domain	Nuclear poly(A) polymerase 3 {ECO:0000303|PubMed:18479511} OS=Arabidopsis thaliana (Mouse-ear cress) PE=1 SV=1	A	RNA processing and modification	PREDICTED: poly(A) polymerase-like [Citrus sinensis]
F01_c3113/f3p7/2538	--	--	Biological Process: regulation of transcription, DNA-templated (GO:0006355);; Biological Process: regulation of nitrogen utilization (GO:0006808);; Biological Process: response to ethylene (GO:0009723);; Biological Process: response to abscisic acid (GO:0009737);; Biological Process: salicylic acid mediated signaling pathway (GO:0009863);; Biological Process: jasmonic acid mediated signaling path…	K14494|0|tcc:TCM_010965|GRAS family transcription factor family protein; K14494 DELLA protein (A)	--	--	GRAS domain family;; Transcriptional regulator DELLA protein N terminal	DELLA protein GAI1 GN=GAI1 OS=Vitis vinifera (Grape) PE=2 SV=1	K	Transcription	GRAS family transcription factor family protein [Theobroma cacao]
F01_c4551/f1p2/3734	[KLB]	--	Biological Process: cellular process (GO:0009987);;	--	[E]	Amino acid transport and metabolism	FACT complex subunit (SPT16/CDC68)	FACT complex subunit SPT16 GN=OSJNBb0062H02.2 OS=Oryza sativa subsp. japonica (Rice) PE=2 SV=2	K	Transcription	hypothetical protein VITISV_017318 [Vitis vinifera]
F01_c13970/f1p1/2135	--	--	--	--	--	--	--	--	S	Function unknown	Uncharacterized protein isoform 2 [Theobroma cacao]
F01_c11539/f3p4/1983	--	--	Cellular Component: plasmodesma (GO:0009506);; Cellular Component: Golgi transport complex (GO:0017119);;	--	[U]	Intracellular trafficking, secretion, and vesicular transport	Dor1-like family;; Vps51/Vps67	--	U	Intracellular trafficking, secretion, and vesicular transport	PREDICTED: conserved oligomeric Golgi complex subunit 8 [Vitis vinifera]
F01_c12031/f2p0/1710	--	--	--	--	--	--	--	BAG family molecular chaperone regulator 8, chloroplastic (Precursor) GN=BAG1 OS=Arabidopsis thaliana (Mouse-ear cress) PE=1 SV=1	S	Function unknown	PREDICTED: BAG family molecular chaperone regulator 8, chloroplastic [Prunus mume]
F01_c2682/f5p0/1222	[O]	Posttranslational modification, protein turnover, chaperones	Cellular Component: vacuolar membrane (GO:0005774);; Cellular Component: plasma membrane (GO:0005886);; Cellular Component: plasmodesma (GO:0009506);; Cellular Component: chloroplast (GO:0009507);; Molecular Function: protein histidine kinase binding (GO:0043424);;	--	[C]	Energy production and conversion	SPFH domain / Band 7 family	Hypersensitive-induced response protein 1 GN=HIR1 OS=Arabidopsis thaliana (Mouse-ear cress) PE=1 SV=1	O	Posttranslational modification, protein turnover, chaperones	PREDICTED: hypersensitive-induced response protein 2 [Cucumis melo]
F01_c9913/f1p2/1286	--	--	Cellular Component: nucleus (GO:0005634);; Molecular Function: oxidoreductase activity (GO:0016491);; Biological Process: oxidation-reduction process (GO:0055114);;	--	--	--	Taurine catabolism dioxygenase TauD, TfdA family	Clavaminate synthase-like protein At3g21360 GN=At3g21360 OS=Arabidopsis thaliana (Mouse-ear cress) PE=1 SV=1	I	Lipid transport and metabolism	unnamed protein product [Vitis vinifera]
F01_c5926/f1p1/3704	[R]	General function prediction only	Molecular Function: protein kinase activity (GO:0004672);; Molecular Function: signal transducer activity (GO:0004871);; Molecular Function: ATP binding (GO:0005524);; Cellular Component: heterotrimeric G-protein complex (GO:0005834);; Biological Process: DNA repair (GO:0006281);; Biological Process: protein phosphorylation (GO:0006468);; Biological Process: red, far-red light phototransduction (…	K16240|0|vvi:100256812|protein SUPPRESSOR OF PHYA-105 1; K16240 protein suppressor of PHYA-105 1 (A)	--	--	WD domain, G-beta repeat	Protein SUPPRESSOR OF PHYA-105 1 GN=F11C10.3/F11C10.4 OS=Arabidopsis thaliana (Mouse-ear cress) PE=1 SV=1	J	Translation, ribosomal structure and biogenesis	PREDICTED: protein SUPPRESSOR OF PHYA-105 1 [Vitis vinifera]
F01_c16387/f1p0/1091	--	--	Molecular Function: hydrolase activity, acting on ester bonds (GO:0016788);;	--	--	--	GDSL-like Lipase/Acylhydrolase	GDSL esterase/lipase 7 (Precursor) GN=GLIP7 OS=Arabidopsis thaliana (Mouse-ear cress) PE=2 SV=1	I	Lipid transport and metabolism	GDSL esterase/lipase [Morus notabilis]
F01_c15877/f1p1/1084	--	--	Molecular Function: acid phosphatase activity (GO:0003993);; Cellular Component: chloroplast (GO:0009507);;	--	--	--	HAD superfamily, subfamily IIIB (Acid phosphatase)	Acid phosphatase 1 (Precursor) GN=APS1 OS=Solanum lycopersicum (Tomato) PE=2 SV=1	R	General function prediction only	hypothetical protein JCGZ_26290 [Jatropha curcas]
F01_c10683/f1p2/3066	--	--	--	--	[L]	Replication, recombination and repair	--	--	L	Replication, recombination and repair	hypothetical protein JCGZ_00363 [Jatropha curcas]
F01_c1514/f1p2/974	[R]	General function prediction only	--	K01070|2.14684e-48|eus:EUTSA_v10017045mg|hypothetical protein; K01070 S-formylglutathione hydrolase [EC:3.1.2.12] (A)	[R]	General function prediction only	Putative esterase	S-formylglutathione hydrolase GN=SFGH OS=Arabidopsis thaliana (Mouse-ear cress) PE=1 SV=2	R	General function prediction only	PREDICTED: S-formylglutathione hydrolase [Elaeis guineensis]
F01_c9040/f1p23/2368	--	--	--	--	--	--	BAG domain	BAG family molecular chaperone regulator 6 GN=T3F17.11 OS=Arabidopsis thaliana (Mouse-ear cress) PE=1 SV=1	T	Signal transduction mechanisms	unnamed protein product [Vitis vinifera]
F01_c16029/f1p0/1330	--	--	Molecular Function: structural molecule activity (GO:0005198);; Cellular Component: plasma membrane (GO:0005886);; Biological Process: response to osmotic stress (GO:0006970);;	--	[U]	Intracellular trafficking, secretion, and vesicular transport	MSP (Major sperm protein) domain	Vesicle-associated protein 4-1 GN=MJP23.9 OS=Arabidopsis thaliana (Mouse-ear cress) PE=2 SV=1	U	Intracellular trafficking, secretion, and vesicular transport	hypothetical protein JCGZ_00709 [Jatropha curcas]
F01_c3195/f2p3/2079	--	--	Molecular Function: nucleotide binding (GO:0000166);; Biological Process: protein targeting to vacuole (GO:0006623);; Molecular Function: zinc ion binding (GO:0008270);; Biological Process: gravitropism (GO:0009630);; Biological Process: vesicle-mediated transport (GO:0016192);;	--	[U]	Intracellular trafficking, secretion, and vesicular transport	Region in Clathrin and VPS	Vacuolar protein sorting-associated protein 41 homolog GN=VPS41 OS=Solanum lycopersicum (Tomato) PE=2 SV=1	U	Intracellular trafficking, secretion, and vesicular transport	PREDICTED: vacuolar protein sorting-associated protein 41 homolog [Vitis vinifera]
F01_c4756/f1p1/3192	--	--	--	--	[D]	Cell cycle control, cell division, chromosome partitioning	RNA recognition motif 2	Protein MEI2-like 2 GN=OJ1008_D06.12-1 OS=Oryza sativa subsp. japonica (Rice) PE=2 SV=1	D	Cell cycle control, cell division, chromosome partitioning	hypothetical protein POPTR_0002s06070g [Populus trichocarpa]
F01_c17567/f1p8/1156	[R]	General function prediction only	Cellular Component: nucleus (GO:0005634);; Cellular Component: cytosol (GO:0005829);; Cellular Component: plasma membrane (GO:0005886);; Biological Process: response to heat (GO:0009408);; Biological Process: response to high light intensity (GO:0009644);; Biological Process: response to hydrogen peroxide (GO:0042542);; Biological Process: response to cadmium ion (GO:0046686);;	K09553|0|pop:POPTR_0003s11290g|POPTRDRAFT_712385; stress inducible family protein; K09553 stress-induced-phosphoprotein 1 (A)	[O]	Posttranslational modification, protein turnover, chaperones	TPR repeat;; Tetratricopeptide repeat;; Tetratricopeptide repeat;; Tetratricopeptide repeat;; Tetratricopeptide repeat;; Tetratricopeptide repeat;; Tetratricopeptide repeat;; Tetratricopeptide repeat;; Tetratricopeptide repeat;; Tetratricopeptide repeat;; Anaphase-promoting complex, cyclosome, subunit 3;; Tetratricopeptide repeat;; Coatomer epsilon subunit	Hsp70-Hsp90 organizing protein 3 GN=HOP3 OS=Arabidopsis thaliana (Mouse-ear cress) PE=2 SV=1	O	Posttranslational modification, protein turnover, chaperones	PREDICTED: hsp70-Hsp90 organizing protein 3-like [Vitis vinifera]
F01_c17981/f23p35/3434	--	--	--	--	--	--	Plant calmodulin-binding domain	--	S	Function unknown	Plant calmodulin-binding protein-related, putative isoform 1 [Theobroma cacao]
F01_c11947/f1p7/2433	[D]	Cell cycle control, cell division, chromosome partitioning	--	K06636|0|cit:102614736|structural maintenance of chromosomes protein 1-like; K06636 structural maintenance of chromosome 1 (A)	[D]	Cell cycle control, cell division, chromosome partitioning	SMC proteins Flexible Hinge Domain;; RecF/RecN/SMC N terminal domain;; P-loop containing region of AAA domain;; AAA domain;; AAA domain	Structural maintenance of chromosomes protein 1 GN=T5N23.30 OS=Arabidopsis thaliana (Mouse-ear cress) PE=2 SV=2	D	Cell cycle control, cell division, chromosome partitioning	PREDICTED: structural maintenance of chromosomes protein 1 [Vitis vinifera]
F01_c12410/f1p2/2915	--	--	Molecular Function: double-stranded RNA binding (GO:0003725);; Molecular Function: phosphoserine phosphatase activity (GO:0004647);; Cellular Component: intracellular (GO:0005622);; Biological Process: response to osmotic stress (GO:0006970);; Biological Process: auxin-activated signaling pathway (GO:0009734);; Biological Process: dephosphorylation (GO:0016311);; Biological Process: positive regu…	--	[K]	Transcription	Double-stranded RNA binding motif	RNA polymerase II C-terminal domain phosphatase-like 2 GN=CPL2 OS=Arabidopsis thaliana (Mouse-ear cress) PE=1 SV=3	K	Transcription	PREDICTED: RNA polymerase II C-terminal domain phosphatase-like 2 isoform X2 [Vitis vinifera]
F01_c9479/f1p0/3676	--	--	Cellular Component: cytoplasm (GO:0005737);;	K06287|5.46186e-70|vvi:100242088|maf-like protein DDB_G0281937; K06287 septum formation protein (A)	--	--	Maf-like protein	3-ketoacyl-CoA synthase 9 GN=KCS9 OS=Arabidopsis thaliana (Mouse-ear cress) PE=2 SV=1	D	Cell cycle control, cell division, chromosome partitioning	PREDICTED: maf-like protein DDB_G0281937 isoform X3 [Vitis vinifera]
F01_c8322/f1p4/2189	--	--	--	--	[S]	Function unknown	Ras-induced vulval development antagonist	--	S	Function unknown	hypothetical protein JCGZ_21917 [Jatropha curcas]
F01_c12239/f1p36/1715	[RTKL]	--	Molecular Function: protein serine/threonine kinase activity (GO:0004674);; Molecular Function: protein serine/threonine/tyrosine kinase activity (GO:0004712);; Molecular Function: non-membrane spanning protein tyrosine kinase activity (GO:0004715);; Molecular Function: ATP binding (GO:0005524);; Biological Process: protein phosphorylation (GO:0006468);; Biological Process: protein glycosylation …	--	[T]	Signal transduction mechanisms	Protein tyrosine kinase;; Protein kinase domain	Serine/threonine-protein kinase EDR1 GN=F22O13.20 OS=Arabidopsis thaliana (Mouse-ear cress) PE=1 SV=1	T	Signal transduction mechanisms	unnamed protein product [Vitis vinifera]
F01_c8848/f1p1/1226	[G]	Carbohydrate transport and metabolism	Biological Process: pentose-phosphate shunt (GO:0006098);; Molecular Function: 6-phosphogluconolactonase activity (GO:0017057);;	K01057|2.37438e-105|rcu:RCOM_1620240|6-phosphogluconolactonase, putative (EC:3.1.1.31); K01057 6-phosphogluconolactonase [EC:3.1.1.31] (A)	[G]	Carbohydrate transport and metabolism	Glucosamine-6-phosphate isomerases/6-phosphogluconolactonase	Probable 6-phosphogluconolactonase 2 OS=Oryza sativa subsp. japonica (Rice) PE=2 SV=1	G	Carbohydrate transport and metabolism	6-phosphogluconolactonase, putative [Ricinus communis]
F01_c16021/f1p20/4418	[RTKL]	--	Biological Process: microtubule cytoskeleton organization (GO:0000226);; Biological Process: cytokinesis by cell plate formation (GO:0000911);; Molecular Function: protein serine/threonine kinase activity (GO:0004674);; Molecular Function: ATP binding (GO:0005524);; Cellular Component: nucleolus (GO:0005730);; Cellular Component: cytoplasm (GO:0005737);; Biological Process: protein phosphorylatio…	K08286|1.42708e-107|tcc:TCM_030455|D6 protein kinase like 2; K08286 protein-serine/threonine kinase [EC:2.7.11.-] (A)	[R]	General function prediction only	Protein kinase domain;; Protein tyrosine kinase	Serine/threonine-protein kinase D6PKL2 GN=MCA23.7 OS=Arabidopsis thaliana (Mouse-ear cress) PE=1 SV=1	T	Signal transduction mechanisms	D6 protein kinase like 2 [Theobroma cacao]
F01_c13968/f2p3/3389	[RTKL]	--	Molecular Function: ATP binding (GO:0005524);; Biological Process: protein phosphorylation (GO:0006468);; Cellular Component: integral component of membrane (GO:0016021);; Molecular Function: 2-alkenal reductase [NAD(P)] activity (GO:0032440);; Molecular Function: tau-protein kinase activity (GO:0050321);; Biological Process: oxidation-reduction process (GO:0055114);;	--	--	--	Leucine Rich repeats (2 copies);; Leucine rich repeat;; Protein kinase domain;; Leucine Rich Repeat;; Protein tyrosine kinase;; Leucine Rich repeat;; Leucine rich repeat;; Leucine rich repeat N-terminal domain	Probably inactive leucine-rich repeat receptor-like protein kinase At3g28040 (Precursor) GN=At3g28040 OS=Arabidopsis thaliana (Mouse-ear cress) PE=2 SV=1	T	Signal transduction mechanisms	Leucine-rich receptor-like protein kinase family protein [Theobroma cacao]
F01_c4971/f1p36/1532	--	--	--	--	--	--	--	--	R	General function prediction only	PREDICTED: uncharacterized protein LOC104434852 [Eucalyptus grandis]
F01_c17462/f1p0/1468	[J]	Translation, ribosomal structure and biogenesis	Molecular Function: serine-tRNA ligase activity (GO:0004828);; Molecular Function: ATP binding (GO:0005524);; Cellular Component: cytosol (GO:0005829);; Biological Process: gluconeogenesis (GO:0006094);; Biological Process: glycolytic process (GO:0006096);; Biological Process: seryl-tRNA aminoacylation (GO:0006434);; Biological Process: N-terminal protein myristoylation (GO:0006499);; Biological …	K01875|0|vvi:100261399|serine--tRNA ligase; K01875 seryl-tRNA synthetase [EC:6.1.1.11] (A)	[J]	Translation, ribosomal structure and biogenesis	Seryl-tRNA synthetase N-terminal domain;; Phosphoprotein	Serine--tRNA ligase OS=Helianthus annuus (Common sunflower) PE=2 SV=1	J	Translation, ribosomal structure and biogenesis	PREDICTED: serine--tRNA ligase [Vitis vinifera]
F01_c8063/f1p9/2658	[G]	Carbohydrate transport and metabolism	Molecular Function: glucosylceramidase activity (GO:0004348);; Cellular Component: plasma membrane (GO:0005886);; Biological Process: glucosylceramide catabolic process (GO:0006680);; Cellular Component: integral component of membrane (GO:0016021);;	K17108|0|vvi:100249401|non-lysosomal glucosylceramidase; K17108 non-lysosomal glucosylceramidase [EC:3.2.1.45] (A)	[G]	Carbohydrate transport and metabolism	Protein of unknown function, DUF608;; beta-Glucocerebrosidase 2 N terminal	--	G	Carbohydrate transport and metabolism	PREDICTED: non-lysosomal glucosylceramidase [Vitis vinifera]
F01_c9002/f1p0/1114	--	--	--	--	[R]	General function prediction only	--	--	R	General function prediction only	PREDICTED: U2 small nuclear ribonucleoprotein B&apos;&apos; [Prunus mume]
F01_c8232/f1p0/1107	--	--	--	--	--	--	Late embryogenesis abundant protein	Protein YLS9 GN=F11F19.11 OS=Arabidopsis thaliana (Mouse-ear cress) PE=2 SV=1	S	Function unknown	PREDICTED: protein YLS9 isoform X2 [Vitis vinifera]
F01_c2479/f4p6/3953	--	--	--	--	[TU]	--	EF-hand domain pair;; EF hand;; EF hand;; EF-hand domain	--	1811	EF hand family protein	PREDICTED: epidermal growth factor receptor substrate 15-like 1 [Vitis vinifera]
F01_c10074/f1p1/1217	--	--	--	--	--	--	D-mannose binding lectin;; PAN-like domain	Epidermis-specific secreted glycoprotein EP1 (Precursor) GN=EP1 OS=Daucus carota (Wild carrot) PE=1 SV=1	R	General function prediction only	PREDICTED: epidermis-specific secreted glycoprotein EP1-like [Malus domestica]
F01_c1393/f7p5/1583	--	--	Molecular Function: anthranilate N-benzoyltransferase activity (GO:0047672);;	--	--	--	Transferase family	BAHD acyltransferase DCR GN=MRO11.2 OS=Arabidopsis thaliana (Mouse-ear cress) PE=2 SV=1	S	Function unknown	hypothetical protein PRUPE_ppa005774mg [Prunus persica]
F01_c3339/f1p0/1241	--	--	--	--	--	--	Zinc-finger domain of monoamine-oxidase A repressor R1	--	S	Function unknown	Cell division cycle-associated 7-like protein [Gossypium arboreum]
F01_c12845/f1p3/3610	--	--	--	--	--	--	BAG domain;; IQ calmodulin-binding motif	BAG family molecular chaperone regulator 6 GN=T3F17.11 OS=Arabidopsis thaliana (Mouse-ear cress) PE=1 SV=1	T	Signal transduction mechanisms	PREDICTED: BAG family molecular chaperone regulator 6 isoform X2 [Vitis vinifera]
F01_c7306/f1p4/2354	--	--	Cellular Component: chromosome, centromeric region (GO:0000775);; Cellular Component: nucleus (GO:0005634);; Biological Process: chromosome segregation (GO:0007059);; Biological Process: mitotic nuclear division (GO:0007067);;	K11578|0|cit:102608682|centromere/kinetochore protein zw10 homolog; K11578 centromere/kinetochore protein ZW10 (A)	[D]	Cell cycle control, cell division, chromosome partitioning	Centromere/kinetochore Zw10	Centromere/kinetochore protein zw10 homolog OS=Arabidopsis thaliana (Mouse-ear cress) PE=1 SV=1	D	Cell cycle control, cell division, chromosome partitioning	PREDICTED: centromere/kinetochore protein zw10 homolog [Vitis vinifera]
F01_c12571/f1p7/2882	--	--	--	--	--	--	--	--	S	Function unknown	PREDICTED: uncharacterized protein LOC100855325 isoform X1 [Vitis vinifera]
F01_c11548/f1p16/2161	--	--	--	--	--	--	--	Uncharacterized protein ORF91 OS=Phalaenopsis aphrodite subsp. formosana (Moth orchid) PE=4 SV=1	S	Function unknown	Mitochondrial protein, putative [Medicago truncatula]
F01_c11786/f2p1/1078	[I]	Lipid transport and metabolism	Molecular Function: enoyl-CoA hydratase activity (GO:0004300);; Cellular Component: mitochondrion (GO:0005739);; Cellular Component: peroxisome (GO:0005777);; Biological Process: fatty acid beta-oxidation (GO:0006635);; Molecular Function: delta3,5-delta2,4-dienoyl-CoA isomerase activity (GO:0051750);;	K12663|1.19814e-107|vvi:100249010|delta(3,5)-Delta(2,4)-dienoyl-CoA isomerase, mitochondrial; K12663 delta(3,5)-Delta(2,4)-dienoyl-CoA isomerase [EC:5.3.3.-] (A)	[I]	Lipid transport and metabolism	Enoyl-CoA hydratase/isomerase family	--	I	Lipid transport and metabolism	PREDICTED: delta(3,5)-Delta(2,4)-dienoyl-CoA isomerase, mitochondrial [Vitis vinifera]
F01_c8753/f1p1/2194	[RTKL]	--	Molecular Function: protein kinase activity (GO:0004672);; Molecular Function: ATP binding (GO:0005524);; Biological Process: protein phosphorylation (GO:0006468);;	--	[T]	Signal transduction mechanisms	Protein kinase domain;; Protein tyrosine kinase	Mitogen-activated protein kinase kinase kinase YODA GN=YDA OS=Arabidopsis thaliana (Mouse-ear cress) PE=1 SV=1	T	Signal transduction mechanisms	PREDICTED: mitogen-activated protein kinase kinase kinase YODA isoform X2 [Vitis vinifera]
F01_c2189/f1p2/2144	[TDBLU]	--	Molecular Function: kinase activity (GO:0016301);; Biological Process: phosphorylation (GO:0016310);; Molecular Function: phosphotransferase activity, alcohol group as acceptor (GO:0016773);;	K08874|0|vvi:100255847|TRRAP; transcription-associated protein 1; K08874 transformation/transcription domain-associated protein (A)	[TBLD]	--	FATC domain	--	1983	Transformation transcription domain-associated protein	PREDICTED: transcription-associated protein 1 [Vitis vinifera]
F01_c17226/f1p5/1064	--	--	--	--	--	--	Plant calmodulin-binding domain	--	S	Function unknown	PREDICTED: uncharacterized protein LOC100247519 isoform X2 [Vitis vinifera]
F01_c9476/f1p1/4190	[V]	Defense mechanisms	--	--	[Q]	Secondary metabolites biosynthesis, transport and catabolism	ABC transporter transmembrane region	ABC transporter C family member 5 GN=F20D22.11 OS=Arabidopsis thaliana (Mouse-ear cress) PE=2 SV=2	Q	Secondary metabolites biosynthesis, transport and catabolism	ABC transporter family protein [Populus trichocarpa]
F01_c6815/f2p0/2293	[R]	General function prediction only	Molecular Function: dolichyl-diphosphooligosaccharide-protein glycotransferase activity (GO:0004579);; Biological Process: protein glycosylation (GO:0006486);; Cellular Component: membrane (GO:0016020);;	K07151|0|vvi:100232931|LTM1; dolichyl-diphosphooligosaccharide--protein glycosyltransferase subunit STT3A; K07151 dolichyl-diphosphooligosaccharide--protein glycosyltransferase [EC:2.4.99.18] (A)	[O]	Posttranslational modification, protein turnover, chaperones	Oligosaccharyl transferase STT3 subunit	Dolichyl-diphosphooligosaccharide--protein glycosyltransferase subunit STT3A GN=STT3A OS=Arabidopsis thaliana (Mouse-ear cress) PE=2 SV=1	O	Posttranslational modification, protein turnover, chaperones	PREDICTED: dolichyl-diphosphooligosaccharide--protein glycosyltransferase subunit STT3A [Vitis vinifera]
F01_c17460/f1p6/2051	[RTKL]	--	Biological Process: mitotic cell cycle (GO:0000278);; Molecular Function: protein serine/threonine kinase activity (GO:0004674);; Molecular Function: ATP binding (GO:0005524);; Biological Process: stomatal lineage progression (GO:0010440);; Biological Process: DNA endoreduplication (GO:0042023);; Biological Process: negative regulation of cyclin-dependent protein serine/threonine kinase activity …	K02208|0|pmum:103327073|cyclin-dependent kinase E-1; K02208 cyclin-dependent kinase 8/11 [EC:2.7.11.22 2.7.11.23] (A)	[K]	Transcription	Protein kinase domain;; Protein tyrosine kinase	Cyclin-dependent kinase E-1 GN=MBK5.8 OS=Arabidopsis thaliana (Mouse-ear cress) PE=1 SV=2	K	Transcription	PREDICTED: cyclin-dependent kinase E-1 [Prunus mume]
F01_c14684/f1p12/2521	--	--	Cellular Component: ubiquitin ligase complex (GO:0000151);; Molecular Function: ubiquitin-protein transferase activity (GO:0004842);; Molecular Function: ATP binding (GO:0005524);; Biological Process: protein ubiquitination (GO:0016567);;	--	[S]	Function unknown	U-box domain;; Armadillo/beta-catenin-like repeat;; Zinc-finger of the MIZ type in Nse subunit	U-box domain-containing protein 19 GN=PUB19 OS=Arabidopsis thaliana (Mouse-ear cress) PE=2 SV=1	S	Function unknown	hypothetical protein CISIN_1g037121mg [Citrus sinensis]
F01_c11359/f2p1/2134	--	--	Molecular Function: sequence-specific DNA binding transcription factor activity (GO:0003700);; Biological Process: regulation of transcription, DNA-templated (GO:0006355);; Molecular Function: sequence-specific DNA binding (GO:0043565);;	--	--	--	WRKY DNA -binding domain	Probable WRKY transcription factor 3 GN=WRKY3 OS=Arabidopsis thaliana (Mouse-ear cress) PE=2 SV=1	K	Transcription	DNA binding protein WRKY2 [Vitis vinifera]
F01_c15961/f1p0/3933	--	--	Biological Process: cellular process (GO:0009987);; Cellular Component: intracellular part (GO:0044424);;	--	[K]	Transcription	--	--	V	Defense mechanisms	hypothetical protein JCGZ_16853 [Jatropha curcas]
F01_c2693/f2p3/3390	[O]	Posttranslational modification, protein turnover, chaperones	--	K08596|0|tcc:TCM_034507|Cysteine proteinases superfamily protein, putative; K08596 sentrin-specific protease 7 [EC:3.4.22.68] (A)	[O]	Posttranslational modification, protein turnover, chaperones	Ulp1 protease family, C-terminal catalytic domain	Probable ubiquitin-like-specific protease 2B OS=Arabidopsis thaliana (Mouse-ear cress) PE=1 SV=3	O	Posttranslational modification, protein turnover, chaperones	PREDICTED: probable ubiquitin-like-specific protease 2B isoform X2 [Vitis vinifera]
F01_c12736/f1p0/1367	[J]	Translation, ribosomal structure and biogenesis	Cellular Component: integral component of membrane (GO:0016021);; Molecular Function: tRNA (adenine-N1-)-methyltransferase activity (GO:0016429);; Biological Process: tRNA methylation (GO:0030488);; Cellular Component: tRNA (m1A) methyltransferase complex (GO:0031515);;	K07442|5.32295e-127|vvi:100242193|tRNA (adenine(58)-N(1))-methyltransferase catalytic subunit TRMT61A; K07442 tRNA (adenine57-N1/adenine58-N1)-methyltransferase [EC:2.1.1.219 2.1.1.220] (A)	[J]	Translation, ribosomal structure and biogenesis	tRNA methyltransferase complex GCD14 subunit	--	J	Translation, ribosomal structure and biogenesis	PREDICTED: tRNA (adenine(58)-N(1))-methyltransferase catalytic subunit TRMT61A [Vitis vinifera]
F01_c9279/f1p0/3681	--	--	Cellular Component: intracellular (GO:0005622);; Biological Process: ER to Golgi vesicle-mediated transport (GO:0006888);;	--	[S]	Function unknown	--	--	U	Intracellular trafficking, secretion, and vesicular transport	Trafficking protein particle complex subunit 2-like protein [Glycine soja]
F01_c19198/f1p2/1202	--	--	Biological Process: cell morphogenesis (GO:0000902);; Biological Process: membrane fusion (GO:0006944);; Biological Process: cell growth (GO:0016049);; Biological Process: Golgi vesicle transport (GO:0048193);;	--	--	--	CUE domain	--	S	Function unknown	PREDICTED: uncharacterized protein LOC100250952 [Vitis vinifera]
F01_c5518/f2p109/2152	--	--	--	--	--	--	BAG domain	BAG family molecular chaperone regulator 6 GN=T3F17.11 OS=Arabidopsis thaliana (Mouse-ear cress) PE=1 SV=1	T	Signal transduction mechanisms	PREDICTED: BAG family molecular chaperone regulator 6 isoform X2 [Vitis vinifera]
F01_c4027/f1p7/3437	[P]	Inorganic ion transport and metabolism	Biological Process: response to superoxide (GO:0000303);; Molecular Function: copper ion binding (GO:0005507);; Molecular Function: ATP binding (GO:0005524);; Cellular Component: endosome (GO:0005768);; Cellular Component: Golgi apparatus (GO:0005794);; Cellular Component: trans-Golgi network (GO:0005802);; Biological Process: protein N-linked glycosylation (GO:0006487);; Biological Process: ATP …	K17686|0|vvi:100266338|copper-transporting ATPase RAN1; K17686 Cu+-exporting ATPase [EC:3.6.3.54] (A)	[P]	Inorganic ion transport and metabolism	haloacid dehalogenase-like hydrolase;; E1-E2 ATPase;; Heavy-metal-associated domain;; haloacid dehalogenase-like hydrolase	Copper-transporting ATPase RAN1 OS=Arabidopsis thaliana (Mouse-ear cress) PE=1 SV=1	P	Inorganic ion transport and metabolism	PREDICTED: copper-transporting ATPase RAN1 [Vitis vinifera]
F01_c3006/f3p1/2703	[L]	Replication, recombination and repair	Molecular Function: deoxyribodipyrimidine photo-lyase activity (GO:0003904);; Cellular Component: vacuole (GO:0005773);; Biological Process: DNA repair (GO:0006281);; Biological Process: chromatin remodeling (GO:0006338);; Biological Process: response to water deprivation (GO:0009414);; Biological Process: phototropism (GO:0009638);; Biological Process: blue light signaling pathway (GO:0009785);;…	K12119|0|tcc:TCM_020885|Cryptochrome 2 isoform 1; K12119 cryptochrome 2 (A)	[LT]	--	FAD binding domain of DNA photolyase	Cryptochrome-2 GN=F19P19.14 OS=Arabidopsis thaliana (Mouse-ear cress) PE=1 SV=2	1625	cryptochrome	Cryptochrome 2 isoform 3 [Theobroma cacao]
F01_c6113/f1p3/2563	--	--	Biological Process: ceramide metabolic process (GO:0006672);; Cellular Component: integral component of membrane (GO:0016021);;	--	--	--	Protein of unknown function (DUF616)	--	S	Function unknown	PREDICTED: uncharacterized protein LOC104599390 [Nelumbo nucifera]
F01_c12188/f1p1/2633	--	--	--	--	[O]	Posttranslational modification, protein turnover, chaperones	--	--	O	Posttranslational modification, protein turnover, chaperones	PREDICTED: uncharacterized protein LOC100245881 [Vitis vinifera]
F01_c12829/f1p0/1563	--	--	Biological Process: transport (GO:0006810);; Cellular Component: integral component of membrane (GO:0016021);;	K15102|5.14784e-143|cit:102607266|mitochondrial phosphate carrier protein 3, mitochondrial-like; K15102 solute carrier family 25 (mitochondrial phosphate transporter), member 3 (A)	[C]	Energy production and conversion	Mitochondrial carrier protein	Mitochondrial phosphate carrier protein 3, mitochondrial (Precursor) GN=MUA22_4 OS=Arabidopsis thaliana (Mouse-ear cress) PE=1 SV=1	C	Energy production and conversion	hypothetical protein CICLE_v10031869mg [Citrus clementina]
F01_c4310/f1p1/1151	--	--	Biological Process: cellular glucan metabolic process (GO:0006073);; Molecular Function: zinc ion binding (GO:0008270);; Molecular Function: ligase activity (GO:0016874);; Biological Process: cellular biosynthetic process (GO:0044249);; Biological Process: organic substance biosynthetic process (GO:1901576);;	--	[T]	Signal transduction mechanisms	Copine	--	M	Cell wall/membrane/envelope biogenesis	PREDICTED: probable starch synthase 4, chloroplastic/amyloplastic [Vitis vinifera]
F01_c9628/f2p0/1013	--	--	Cellular Component: plastid (GO:0009536);; Biological Process: thylakoid membrane organization (GO:0010027);;	--	--	--	--	--	S	Function unknown	PREDICTED: uncharacterized protein LOC104606424 [Nelumbo nucifera]
F01_c16721/f1p6/1864	--	--	Biological Process: signal transduction (GO:0007165);;	--	--	--	PX domain	--	R	General function prediction only	PREDICTED: uncharacterized protein LOC100250817 [Vitis vinifera]
F01_c3983/f1p0/2109	--	--	--	--	[O]	Posttranslational modification, protein turnover, chaperones	Ubiquitin family	Ubiquitin domain-containing protein DSK2b GN=DSK2B OS=Arabidopsis thaliana (Mouse-ear cress) PE=1 SV=1	O	Posttranslational modification, protein turnover, chaperones	PREDICTED: uncharacterized protein LOC100260199 isoform X3 [Vitis vinifera]
F01_c7634/f1p1/2168	--	--	Molecular Function: iron ion binding (GO:0005506);; Cellular Component: cytoplasm (GO:0005737);; Molecular Function: linoleate 13S-lipoxygenase activity (GO:0016165);; Biological Process: oxylipin biosynthetic process (GO:0031408);; Biological Process: oxidation-reduction process (GO:0055114);;	K15718|0|vvi:100252850|probable linoleate 9S-lipoxygenase 5; K15718 linoleate 9S-lipoxygenase [EC:1.13.11.58] (A)	--	--	Lipoxygenase	Probable linoleate 9S-lipoxygenase 5 GN=LOX1.5 OS=Solanum tuberosum (Potato) PE=2 SV=1	S	Function unknown	lipoxygenase [Corylus avellana]
F01_c3213/f1p6/1681	[Q]	Secondary metabolites biosynthesis, transport and catabolism	Cellular Component: endoplasmic reticulum (GO:0005783);; Molecular Function: oxidoreductase activity (GO:0016491);; Cellular Component: organelle membrane (GO:0031090);; Cellular Component: membrane part (GO:0044425);; Molecular Function: metal ion binding (GO:0046872);;	--	[Q]	Secondary metabolites biosynthesis, transport and catabolism	Cytochrome P450	Cytochrome P450 71A1 GN=CYP71A1 OS=Persea americana (Avocado) PE=1 SV=2	Q	Secondary metabolites biosynthesis, transport and catabolism	hypothetical protein POPTR_0012s09140g [Populus trichocarpa]
F01_c10153/f1p7/2005	[Q]	Secondary metabolites biosynthesis, transport and catabolism	Cellular Component: chloroplast (GO:0009507);; Biological Process: carotenoid biosynthetic process (GO:0016117);; Molecular Function: isomerase activity (GO:0016853);; Molecular Function: all-trans-retinol 13,14-reductase activity (GO:0051786);; Biological Process: oxidation-reduction process (GO:0055114);;	--	[H]	Coenzyme transport and metabolism	NAD(P)-binding Rossmann-like domain;; Flavin containing amine oxidoreductase;; FAD dependent oxidoreductase;; FAD binding domain;; Thi4 family	Prolycopene isomerase, chloroplastic (Precursor) GN=CRTISO OS=Daucus carota (Wild carrot) PE=2 SV=1	H	Coenzyme transport and metabolism	hypothetical protein MIMGU_mgv1a0217391mg, partial [Erythranthe guttata]
F01_c4594/f1p0/1260	--	--	Molecular Function: inorganic phosphate transmembrane transporter activity (GO:0005315);; Biological Process: glucose catabolic process (GO:0006007);; Biological Process: purine nucleobase transport (GO:0006863);; Biological Process: vacuole organization (GO:0007033);; Cellular Component: plastid (GO:0009536);; Biological Process: embryo sac development (GO:0009553);; Biological Process: embryo d…	K15283|3.13927e-174|tcc:TCM_030978|Glucose 6-phosphate/phosphate translocator 1 isoform 1; K15283 solute carrier family 35, member E1 (A)	[GE]	--	Triose-phosphate Transporter family;; EamA-like transporter family	Glucose-6-phosphate/phosphate translocator 2, chloroplastic (Precursor) GN=GPT2 OS=Arabidopsis thaliana (Mouse-ear cress) PE=2 SV=2	G	Carbohydrate transport and metabolism	PREDICTED: glucose-6-phosphate/phosphate translocator 2, chloroplastic-like [Nelumbo nucifera]
F01_c5140/f2p2/3237	--	--	Cellular Component: nucleus (GO:0005634);; Cellular Component: cytosol (GO:0005829);; Biological Process: fatty acid beta-oxidation (GO:0006635);; Molecular Function: zinc ion binding (GO:0008270);; Cellular Component: phragmoplast (GO:0009524);; Biological Process: protein import into peroxisome matrix (GO:0016558);;	--	[S]	Function unknown	C3HC zinc finger-like	--	S	Function unknown	PREDICTED: uncharacterized protein LOC100254898 isoform X2 [Vitis vinifera]
F01_c7787/f1p1/1234	--	--	--	K18667|3.23671e-99|pxb:103945275|uncharacterized LOC103945275; K18667 activating signal cointegrator complex subunit 2 (A)	--	--	--	--	R	General function prediction only	PREDICTED: uncharacterized protein LOC103945275 isoform X1 [Pyrus x bretschneideri]
F01_c9266/f1p55/2072	--	--	Molecular Function: nucleotide binding (GO:0000166);; Molecular Function: nucleic acid binding (GO:0003676);; Molecular Function: RNA-directed RNA polymerase activity (GO:0003968);; Biological Process: response to virus (GO:0009615);; Biological Process: response to salicylic acid (GO:0009751);; Biological Process: positive regulation of posttranscriptional gene silencing (GO:0060148);;	K11699|0|pop:POPTR_0008s13550g|POPTRDRAFT_820696; RNA-directed RNA Polymerase family protein; K11699 RNA-dependent RNA polymerase [EC:2.7.7.48] (A)	[A]	RNA processing and modification	RNA dependent RNA polymerase	RNA-dependent RNA polymerase 1 GN=F10B6.19 OS=Arabidopsis thaliana (Mouse-ear cress) PE=2 SV=1	A	RNA processing and modification	PREDICTED: RNA-dependent RNA polymerase 1-like isoform X2 [Populus euphratica]
F01_c13959/f1p6/1238	[O]	Posttranslational modification, protein turnover, chaperones	Molecular Function: Rab GDP-dissociation inhibitor activity (GO:0005093);; Biological Process: protein transport (GO:0015031);;	K17255|0|cit:102625537|rab GDP dissociation inhibitor alpha-like; K17255 Rab GDP dissociation inhibitor (A)	[O]	Posttranslational modification, protein turnover, chaperones	GDP dissociation inhibitor	Guanosine nucleotide diphosphate dissociation inhibitor 2 GN=GDI2 OS=Arabidopsis thaliana (Mouse-ear cress) PE=2 SV=1	O	Posttranslational modification, protein turnover, chaperones	hypothetical protein CISIN_1g013352mg [Citrus sinensis]
F01_c12042/f1p3/2146	--	--	--	--	[S]	Function unknown	Uncharacterised conserved protein (DUF2359)	--	S	Function unknown	unnamed protein product [Vitis vinifera]
F01_c13176/f15p18/3530	--	--	--	--	[TU]	--	EF-hand domain pair	--	1885	EF hand family protein	PREDICTED: actin cytoskeleton-regulatory complex protein PAN1 [Vitis vinifera]
F01_c10017/f2p0/1139	--	--	Molecular Function: nucleotide binding (GO:0000166);; Molecular Function: pyrroline-5-carboxylate reductase activity (GO:0004735);; Cellular Component: cell wall (GO:0005618);; Cellular Component: cytoplasm (GO:0005737);; Biological Process: threonine catabolic process (GO:0006567);; Biological Process: response to heat (GO:0009408);; Biological Process: response to salt stress (GO:0009651);; Bio…	K00286|5.79272e-112|cit:102613618|pyrroline-5-carboxylate reductase-like; K00286 pyrroline-5-carboxylate reductase [EC:1.5.1.2] (A)	[E]	Amino acid transport and metabolism	NADP oxidoreductase coenzyme F420-dependent;; NAD-dependent glycerol-3-phosphate dehydrogenase N-terminus	Pyrroline-5-carboxylate reductase OS=Actinidia chinensis (Kiwi) PE=2 SV=1	E	Amino acid transport and metabolism	PREDICTED: pyrroline-5-carboxylate reductase-like [Citrus sinensis]
F01_c2500/f2p0/1395	[R]	General function prediction only	Molecular Function: carboxylic ester hydrolase activity (GO:0004091);; Biological Process: embryo development ending in seed dormancy (GO:0009793);;	--	[R]	General function prediction only	--	Embryogenesis-associated protein EMB8 GN=EMB8 OS=Picea glauca (White spruce) PE=2 SV=1	R	General function prediction only	PREDICTED: embryogenesis-associated protein EMB8 [Vitis vinifera]
F01_c18372/f3p2/1604	[K]	Transcription	--	K09419|1.02616e-115|rcu:RCOM_1278140|Heat shock factor protein HSF8, putative; K09419 heat shock transcription factor, other eukaryote (A)	[K]	Transcription	HSF-type DNA-binding	Heat shock factor protein HSF8 GN=HSF8 OS=Solanum lycopersicum (Tomato) PE=3 SV=1	K	Transcription	Heat shock factor protein HSF8, putative [Ricinus communis]
F01_c17467/f3p9/2036	--	--	Cellular Component: endosome (GO:0005768);; Cellular Component: Golgi medial cisterna (GO:0005797);; Cellular Component: cis-Golgi network (GO:0005801);; Cellular Component: trans-Golgi network (GO:0005802);; Cellular Component: integral component of membrane (GO:0016021);;	K17087|0|vvi:100251178|transmembrane 9 superfamily member 1; K17087 transmembrane 9 superfamily member 3 (A)	[U]	Intracellular trafficking, secretion, and vesicular transport	Endomembrane protein 70	Transmembrane 9 superfamily member 1 {ECO:0000305} (Precursor) OS=Arabidopsis thaliana (Mouse-ear cress) PE=1 SV=1	U	Intracellular trafficking, secretion, and vesicular transport	PREDICTED: transmembrane 9 superfamily member 3 [Nelumbo nucifera]
F01_c9617/f1p4/3682	--	--	Molecular Function: zinc ion binding (GO:0008270);; Molecular Function: ligase activity (GO:0016874);;	K10691|0|tcc:TCM_019010|Auxin transport protein (BIG) isoform 1; K10691 E3 ubiquitin-protein ligase UBR4 [EC:6.3.2.19] (A)	[T]	Signal transduction mechanisms	E3 ubiquitin-protein ligase UBR4	Auxin transport protein BIG GN=At3g02260 OS=Arabidopsis thaliana (Mouse-ear cress) PE=1 SV=2	T	Signal transduction mechanisms	ubiquitin-protein ligase, putative [Ricinus communis]
F01_c11464/f2p2/2857	[P]	Inorganic ion transport and metabolism	Molecular Function: voltage-gated chloride channel activity (GO:0005247);; Cellular Component: trans-Golgi network (GO:0005802);; Biological Process: chloride transport (GO:0006821);; Biological Process: cell adhesion (GO:0007155);; Biological Process: unidimensional cell growth (GO:0009826);; Biological Process: response to metal ion (GO:0010038);; Biological Process: trichome morphogenesis (GO:…	K05016|0|vvi:100261408|chloride channel ClC6; K05016 chloride channel 7 (A)	[P]	Inorganic ion transport and metabolism	Voltage gated chloride channel;; CBS domain	Chloride channel protein CLC-d OS=Arabidopsis thaliana (Mouse-ear cress) PE=1 SV=2	P	Inorganic ion transport and metabolism	uncharacterized protein LOC100261408 [Vitis vinifera]
F01_c6752/f1p0/1701	--	--	--	--	--	--	--	--	S	Function unknown	PREDICTED: uncharacterized protein LOC104603727 [Nelumbo nucifera]
F01_c9289/f2p3/1232	[E]	Amino acid transport and metabolism	Molecular Function: cysteine synthase activity (GO:0004124);; Cellular Component: nucleus (GO:0005634);; Cellular Component: peroxisome (GO:0005777);; Cellular Component: plasma membrane (GO:0005886);; Biological Process: cysteine biosynthetic process from serine (GO:0006535);; Biological Process: aging (GO:0007568);; Cellular Component: chloroplast (GO:0009507);; Biological Process: response to …	K01738|1.14543e-149|mdm:103416847|cysteine synthase; K01738 cysteine synthase A [EC:2.5.1.47] (A)	[E]	Amino acid transport and metabolism	Pyridoxal-phosphate dependent enzyme	Cysteine synthase OS=Citrullus lanatus (Watermelon) PE=1 SV=1	E	Amino acid transport and metabolism	PREDICTED: cysteine synthase [Malus domestica]
F01_c12655/f1p0/1842	--	--	--	--	--	--	--	--	S	Function unknown	PREDICTED: uncharacterized protein LOC100262535 [Vitis vinifera]
F01_c8303/f1p2/2125	--	--	--	K06316|7.62114e-103|tcc:TCM_014899|Lipid transporters isoform 1; K06316 oligosaccharide translocation protein RFT1 (A)	[D]	Cell cycle control, cell division, chromosome partitioning	Rft protein	--	D	Cell cycle control, cell division, chromosome partitioning	Lipid transporters isoform 1 [Theobroma cacao]
F01_c5373/f1p1/3225	--	--	Biological Process: ethylene biosynthetic process (GO:0009693);; Biological Process: primary metabolic process (GO:0044238);; Biological Process: regulation of biological process (GO:0050789);;	--	--	--	TPR repeat;; Tetratricopeptide repeat;; Tetratricopeptide repeat	Ethylene-overproduction protein 1 GN=ETO1 OS=Arabidopsis thaliana (Mouse-ear cress) PE=1 SV=2	R	General function prediction only	Tetratricopeptide repeat (TPR)-containing protein [Theobroma cacao]
F01_c18558/f2p6/1261	--	--	--	--	--	--	--	--	S	Function unknown	PREDICTED: uncharacterized protein LOC104220737 isoform X2 [Nicotiana sylvestris]
F01_c11660/f1p0/2186	--	--	Molecular Function: nucleotide binding (GO:0000166);; Molecular Function: substrate-specific transmembrane transporter activity (GO:0022891);; Molecular Function: ATPase activity, coupled to transmembrane movement of substances (GO:0042626);;	--	[Q]	Secondary metabolites biosynthesis, transport and catabolism	ABC-transporter extracellular N-terminal	Pleiotropic drug resistance protein 1 GN=PDR1 OS=Nicotiana plumbaginifolia (Leadwort-leaved tobacco) PE=1 SV=1	Q	Secondary metabolites biosynthesis, transport and catabolism	PREDICTED: pleiotropic drug resistance protein 1-like [Sesamum indicum]
F01_c3910/f1p6/1089	[C]	Energy production and conversion	Biological Process: MAPK cascade (GO:0000165);; Molecular Function: magnesium ion binding (GO:0000287);; Molecular Function: inorganic diphosphatase activity (GO:0004427);; Biological Process: protein targeting to membrane (GO:0006612);; Biological Process: phosphate-containing compound metabolic process (GO:0006796);; Biological Process: response to cold (GO:0009409);; Cellular Component: chloro…	K01507|3.05655e-117|rcu:RCOM_0816840|inorganic pyrophosphatase, putative (EC:3.6.1.1); K01507 inorganic pyrophosphatase [EC:3.6.1.1] (A)	[C]	Energy production and conversion	Inorganic pyrophosphatase	Soluble inorganic pyrophosphatase 1, chloroplastic (Precursor) GN=At5g09650 OS=Arabidopsis thaliana (Mouse-ear cress) PE=1 SV=1	C	Energy production and conversion	inorganic pyrophosphatase, putative [Ricinus communis]
F01_c2288/f3p2/3828	--	--	--	K18667|0|pmum:103320418|uncharacterized LOC103320418; K18667 activating signal cointegrator complex subunit 2 (A)	--	--	SPOC domain	--	R	General function prediction only	PREDICTED: uncharacterized protein LOC100259158 isoform X1 [Vitis vinifera]
F01_c2175/f3p5/2300	[J]	Translation, ribosomal structure and biogenesis	Molecular Function: GTPase activity (GO:0003924);; Molecular Function: copper ion binding (GO:0005507);; Molecular Function: GTP binding (GO:0005525);; Cellular Component: nucleolus (GO:0005730);; Cellular Component: cytosol (GO:0005829);; Cellular Component: plasma membrane (GO:0005886);; Biological Process: GTP catabolic process (GO:0006184);; Biological Process: response to cold (GO:0009409);;…	K03234|0|vvi:100261253|elongation factor 2; K03234 elongation factor 2 (A)	[J]	Translation, ribosomal structure and biogenesis	Elongation factor Tu GTP binding domain	Elongation factor 2 OS=Beta vulgaris (Sugar beet) PE=2 SV=1	J	Translation, ribosomal structure and biogenesis	hypothetical protein CISIN_1g003165mg [Citrus sinensis]
F01_c8573/f2p1/1177	--	--	Molecular Function: DNA binding (GO:0003677);; Biological Process: regulation of transcription, DNA-templated (GO:0006355);;	--	--	--	Dof domain, zinc finger	Dof zinc finger protein DOF5.4 GN=MAE1.9 OS=Arabidopsis thaliana (Mouse-ear cress) PE=2 SV=2	R	General function prediction only	hypothetical protein POPTR_0007s11620g [Populus trichocarpa]
F01_c7535/f1p0/1652	--	--	--	--	--	--	Protein of unknown function (DUF1421)	--	S	Function unknown	PREDICTED: altered inheritance of mitochondria protein 3-like [Malus domestica]
F01_c8438/f2p0/1881	[GEPR]	--	Biological Process: carbohydrate transport (GO:0008643);; Cellular Component: integral component of membrane (GO:0016021);; Molecular Function: substrate-specific transmembrane transporter activity (GO:0022891);; Molecular Function: 2-alkenal reductase [NAD(P)] activity (GO:0032440);; Biological Process: transmembrane transport (GO:0055085);; Biological Process: oxidation-reduction process (GO:00…	--	[R]	General function prediction only	Sugar (and other) transporter;; Major Facilitator Superfamily	D-xylose-proton symporter-like 3, chloroplastic (Precursor) GN=At5g59250 OS=Arabidopsis thaliana (Mouse-ear cress) PE=2 SV=2	R	General function prediction only	hypothetical protein JCGZ_02943 [Jatropha curcas]
F01_c7251/f2p0/3231	--	--	--	--	--	--	--	--	S	Function unknown	hypothetical protein POPTR_0005s04570g [Populus trichocarpa]
F01_c1714/f4p2/1011	[R]	General function prediction only	Molecular Function: GTP binding (GO:0005525);; Cellular Component: nucleus (GO:0005634);; Cellular Component: spindle (GO:0005819);; Cellular Component: plasma membrane (GO:0005886);; Biological Process: actin filament organization (GO:0007015);; Biological Process: small GTPase mediated signal transduction (GO:0007264);; Cellular Component: phragmoplast (GO:0009524);; Biological Process: auxin-a…	K04392|2.62305e-124|csv:101218715|rac-like GTP-binding protein ARAC1-like; K04392 Ras-related C3 botulinum toxin substrate 1 (A)	[R]	General function prediction only	Ras family;; Miro-like protein;; ADP-ribosylation factor family	Rac-like GTP-binding protein ARAC1 (Precursor) GN=T17A5.14 OS=Arabidopsis thaliana (Mouse-ear cress) PE=2 SV=1	R	General function prediction only	PREDICTED: rac-like GTP-binding protein ARAC1-like [Cucumis sativus]
F01_c6707/f3p10/2537	--	--	Molecular Function: calcium ion binding (GO:0005509);; Cellular Component: vacuole (GO:0005773);; Cellular Component: membrane (GO:0016020);; Cellular Component: Golgi transport complex (GO:0017119);;	--	--	--	WWamide peptide	Vacuolar-sorting receptor 3 (Precursor) GN=F26C24.12 OS=Arabidopsis thaliana (Mouse-ear cress) PE=2 SV=1	U	Intracellular trafficking, secretion, and vesicular transport	Vaculolar sorting receptor 3 isoform 1 [Theobroma cacao]
F01_c6182/f1p1/1108	--	--	Molecular Function: transferase activity, transferring phosphorus-containing groups (GO:0016772);;	--	--	--	Salt stress response/antifungal	Cysteine-rich receptor-like protein kinase 25 (Precursor) GN=CRK25 OS=Arabidopsis thaliana (Mouse-ear cress) PE=3 SV=1	T	Signal transduction mechanisms	unnamed protein product [Vitis vinifera]
F01_c12314/f1p1/2609	[Q]	Secondary metabolites biosynthesis, transport and catabolism	Molecular Function: copper ion binding (GO:0005507);; Molecular Function: primary amine oxidase activity (GO:0008131);; Biological Process: amine metabolic process (GO:0009308);; Molecular Function: quinone binding (GO:0048038);; Biological Process: oxidation-reduction process (GO:0055114);;	K00276|0|pxb:103937550|copper amine oxidase 1-like; K00276 primary-amine oxidase [EC:1.4.3.21] (A)	[Q]	Secondary metabolites biosynthesis, transport and catabolism	Copper amine oxidase, enzyme domain;; Copper amine oxidase, N3 domain;; Copper amine oxidase, N2 domain	Primary amine oxidase (Precursor) OS=Pisum sativum (Garden pea) PE=1 SV=1	Q	Secondary metabolites biosynthesis, transport and catabolism	PREDICTED: copper amine oxidase 1-like isoform X1 [Nelumbo nucifera]
F01_c8716/f2p0/1415	[R]	General function prediction only	Molecular Function: nucleotide binding (GO:0000166);; Molecular Function: nucleic acid binding (GO:0003676);;	--	[R]	General function prediction only	RNA recognition motif. (a.k.a. RRM, RBD, or RNP domain);; RNA recognition motif (a.k.a. RRM, RBD, or RNP domain);; RNA recognition motif. (a.k.a. RRM, RBD, or RNP domain);; RNA binding motif	Polyadenylate-binding protein RBP45B GN=RBP45B OS=Arabidopsis thaliana (Mouse-ear cress) PE=1 SV=1	A	RNA processing and modification	PREDICTED: polyadenylate-binding protein RBP45 isoform X1 [Nelumbo nucifera]
F01_c13385/f1p0/1051	--	--	Molecular Function: ubiquitin-protein transferase activity (GO:0004842);; Biological Process: protein ubiquitination (GO:0016567);; Biological Process: DNA endoreduplication (GO:0042023);; Biological Process: proteasome-mediated ubiquitin-dependent protein catabolic process (GO:0043161);; Biological Process: proteasome assembly (GO:0043248);; Biological Process: regulation of unidimensional cell …	K06689|3.45952e-102|pper:PRUPE_ppa012939mg|hypothetical protein; K06689 ubiquitin-conjugating enzyme E2 D/E [EC:6.3.2.19] (A)	[O]	Posttranslational modification, protein turnover, chaperones	Ubiquitin-conjugating enzyme;; RWD domain	Ubiquitin-conjugating enzyme E2 8 GN=MBK23.24 OS=Arabidopsis thaliana (Mouse-ear cress) PE=1 SV=1	O	Posttranslational modification, protein turnover, chaperones	hypothetical protein PRUPE_ppa012939mg [Prunus persica]
F01_c6280/f1p0/1456	[J]	Translation, ribosomal structure and biogenesis	Molecular Function: structural constituent of ribosome (GO:0003735);; Cellular Component: mitochondrion (GO:0005739);; Cellular Component: ribosome (GO:0005840);; Biological Process: translation (GO:0006412);;	K02906|1.80335e-175|vvi:100257955|50S ribosomal protein L3-2, chloroplastic; K02906 large subunit ribosomal protein L3 (A)	[J]	Translation, ribosomal structure and biogenesis	Ribosomal protein L3	50S ribosomal protein L3-2, chloroplastic (Precursor) GN=RPL3B OS=Arabidopsis thaliana (Mouse-ear cress) PE=2 SV=1	J	Translation, ribosomal structure and biogenesis	PREDICTED: 50S ribosomal protein L3-2, chloroplastic [Vitis vinifera]
F01_c8769/f1p7/2155	--	--	--	--	--	--	CAP160 repeat	Low-temperature-induced 65 kDa protein GN=K24M7.3 OS=Arabidopsis thaliana (Mouse-ear cress) PE=2 SV=2	R	General function prediction only	seed maturation protein PM39 [Glycine max]
F01_c1259/f1p10/1001	--	--	Molecular Function: DNA photolyase activity (GO:0003913);; Molecular Function: protein kinase activity (GO:0004672);; Molecular Function: ATP binding (GO:0005524);; Cellular Component: nucleus (GO:0005634);; Cellular Component: cytoplasm (GO:0005737);; Biological Process: DNA repair (GO:0006281);; Biological Process: response to water deprivation (GO:0009414);; Biological Process: detection of li…	K12118|1.21225e-90|pop:POPTR_0005s17100g|POPTRDRAFT_559103; cryptochrome 1 family protein; K12118 cryptochrome 1 (A)	[LT]	--	Blue/Ultraviolet sensing protein C terminal	Cryptochrome-1 OS=Arabidopsis thaliana (Mouse-ear cress) PE=1 SV=2	464	cryptochrome	cryptochrome 1 family protein [Populus trichocarpa]
F01_c14141/f1p2/2048	[RTKL]	--	Molecular Function: ATP binding (GO:0005524);; Biological Process: protein phosphorylation (GO:0006468);; Molecular Function: RNA polymerase II carboxy-terminal domain kinase activity (GO:0008353);;	K08819|0|cit:102625882|probable serine/threonine-protein kinase At1g54610-like; K08819 cyclin-dependent kinase 12/13 [EC:2.7.11.22 2.7.11.23] (A)	[D]	Cell cycle control, cell division, chromosome partitioning	Protein kinase domain	Probable serine/threonine-protein kinase At1g54610 GN=At1g54610 OS=Arabidopsis thaliana (Mouse-ear cress) PE=1 SV=1	T	Signal transduction mechanisms	hypothetical protein CICLE_v10000698mg [Citrus clementina]
F01_c13721/f1p3/1201	--	--	Molecular Function: nucleic acid binding (GO:0003676);; Molecular Function: ATP binding (GO:0005524);; Molecular Function: ATP-dependent helicase activity (GO:0008026);;	K14442|5.24107e-154|pvu:PHAVU_011G1853000|hypothetical protein; K14442 ATP-dependent RNA helicase DHX36 [EC:3.6.4.13] (A)	[A]	RNA processing and modification	Oligonucleotide/oligosaccharide-binding (OB)-fold	Probable pre-mRNA-splicing factor ATP-dependent RNA helicase GN=At3g26560 OS=Arabidopsis thaliana (Mouse-ear cress) PE=1 SV=2	A	RNA processing and modification	unnamed protein product [Vitis vinifera]
F01_c2029/f8p4/2135	[LKJ]	--	Molecular Function: nucleic acid binding (GO:0003676);; Molecular Function: ATP binding (GO:0005524);; Molecular Function: ATP-dependent helicase activity (GO:0008026);;	K12614|0|vvi:100251721|DEAD-box ATP-dependent RNA helicase 8-like; K12614 ATP-dependent RNA helicase DDX6/DHH1 [EC:3.6.4.13] (A)	[A]	RNA processing and modification	DEAD/DEAH box helicase;; Helicase conserved C-terminal domain	DEAD-box ATP-dependent RNA helicase 8 GN=RH8 OS=Arabidopsis thaliana (Mouse-ear cress) PE=2 SV=1	A	RNA processing and modification	unnamed protein product [Vitis vinifera]
F01_c1938/f6p3/2160	--	--	Cellular Component: membrane (GO:0016020);;	--	[R]	General function prediction only	PPR repeat family;; PPR repeat;; PPR repeat;; Pentatricopeptide repeat domain	Pentatricopeptide repeat-containing protein At1g09900 GN=At1g09900 OS=Arabidopsis thaliana (Mouse-ear cress) PE=2 SV=1	R	General function prediction only	hypothetical protein CICLE_v10000605mg [Citrus clementina]
F01_c17509/f2p4/3638	[RTKL]	--	--	--	--	--	Protein tyrosine kinase;; Protein kinase domain;; D-mannose binding lectin;; S-locus glycoprotein family;; PAN-like domain;; Wall-associated receptor kinase galacturonan-binding	G-type lectin S-receptor-like serine/threonine-protein kinase At4g03230 (Precursor) GN=At4g03230 OS=Arabidopsis thaliana (Mouse-ear cress) PE=3 SV=3	T	Signal transduction mechanisms	PREDICTED: G-type lectin S-receptor-like serine/threonine-protein kinase At4g03230 isoform X1 [Pyrus x bretschneideri]
F01_c16372/f1p0/1192	--	--	--	--	--	--	Protein of unknown function (DUF506)	--	S	Function unknown	Sugar phosphate exchanger 2, putative [Theobroma cacao]
F01_c10698/f2p4/1733	--	--	Biological Process: protein targeting to vacuole (GO:0006623);; Cellular Component: membrane (GO:0016020);; Biological Process: vesicle-mediated transport (GO:0016192);;	--	[S]	Function unknown	Serine incorporator (Serinc)	--	S	Function unknown	hypothetical protein JCGZ_26944 [Jatropha curcas]
F01_c5550/f2p2/1320	[GER]	--	Cellular Component: integral component of membrane (GO:0016021);; Biological Process: transmembrane transport (GO:0055085);;	K15275|0|tcc:TCM_011775|UDP-galactose transporter 3 isoform 1; K15275 solute carrier family 35 (UDP-galactose transporter), member B1 (A)	[G]	Carbohydrate transport and metabolism	UAA transporter family;; EamA-like transporter family	UDP-galactose/UDP-glucose transporter 3 GN=F14L17.13 OS=Arabidopsis thaliana (Mouse-ear cress) PE=1 SV=1	G	Carbohydrate transport and metabolism	UDP-galactose transporter 3 isoform 1 [Theobroma cacao]
F01_c16858/f1p2/1895	--	--	--	--	[R]	General function prediction only	--	Sugar transporter ERD6-like 2 GN=SUGTL3 OS=Arabidopsis thaliana (Mouse-ear cress) PE=2 SV=1	R	General function prediction only	PREDICTED: sugar transporter ERD6-like 3 [Tarenaya hassleriana]
F01_c11693/f1p30/2197	[M]	Cell wall/membrane/envelope biogenesis	Molecular Function: zinc ion binding (GO:0008270);; Cellular Component: integral component of membrane (GO:0016021);; Molecular Function: cellulose synthase (UDP-forming) activity (GO:0016760);; Biological Process: cellulose biosynthetic process (GO:0030244);;	K10999|0|vvi:100242715|probable cellulose synthase A catalytic subunit 5 [UDP-forming]; K10999 cellulose synthase A [EC:2.4.1.12] (A)	--	--	Cellulose synthase	Probable cellulose synthase A catalytic subunit 5 [UDP-forming] OS=Oryza sativa subsp. japonica (Rice) PE=2 SV=1	O	Posttranslational modification, protein turnover, chaperones	PREDICTED: probable cellulose synthase A catalytic subunit 5 [UDP-forming] [Vitis vinifera]
F01_c4494/f1p0/2419	--	--	Biological Process: cell morphogenesis (GO:0000902);; Biological Process: epidermal cell differentiation (GO:0009913);; Biological Process: positive regulation of organelle organization (GO:0010638);; Biological Process: cellular macromolecule biosynthetic process (GO:0034645);; Biological Process: cell wall biogenesis (GO:0042546);; Biological Process: xylan metabolic process (GO:0045491);; Biol…	--	--	--	--	Squamosa promoter-binding-like protein 7 GN=SPL7 OS=Arabidopsis thaliana (Mouse-ear cress) PE=1 SV=2	S	Function unknown	unnamed protein product [Vitis vinifera]
F01_c1564/f4p5/3571	[U]	Intracellular trafficking, secretion, and vesicular transport	Cellular Component: Golgi apparatus (GO:0005794);; Biological Process: intracellular protein transport (GO:0006886);; Biological Process: Golgi to vacuole transport (GO:0006896);; Molecular Function: protein transporter activity (GO:0008565);; Cellular Component: AP-3 adaptor complex (GO:0030123);; Biological Process: regulation of intracellular pH (GO:0051453);; Biological Process: lytic vacuole…	K12397|0|vvi:100251289|AP3-complex subunit beta-A; K12397 AP-3 complex subunit beta (A)	[U]	Intracellular trafficking, secretion, and vesicular transport	Adaptin N terminal region;; HEAT repeats;; HEAT repeat;; Clathrin-adaptor complex-3 beta-1 subunit C-terminal	AP3-complex subunit beta-A GN=T22E16.140 OS=Arabidopsis thaliana (Mouse-ear cress) PE=2 SV=2	U	Intracellular trafficking, secretion, and vesicular transport	PREDICTED: AP3-complex subunit beta-A [Vitis vinifera]
F01_c5756/f1p1/1343	[R]	General function prediction only	Biological Process: organ senescence (GO:0010260);; Molecular Function: flavonol synthase activity (GO:0045431);; Biological Process: flavonol biosynthetic process (GO:0051555);; Biological Process: oxidation-reduction process (GO:0055114);;	--	[QR]	--	2OG-Fe(II) oxygenase superfamily	Codeine O-demethylase GN=CODM OS=Papaver somniferum (Opium poppy) PE=1 SV=1	Q	Secondary metabolites biosynthesis, transport and catabolism	PREDICTED: protein SRG1-like [Nelumbo nucifera]
F01_c14838/f1p3/2173	[S]	Function unknown	--	--	[T]	Signal transduction mechanisms	Leucine Rich repeats (2 copies);; Leucine rich repeat;; Leucine Rich Repeat;; Leucine Rich repeat;; Leucine-rich repeat;; Leucine rich repeat	187-kDa microtubule-associated protein AIR9 GN=AIR9 OS=Arabidopsis thaliana (Mouse-ear cress) PE=2 SV=1	T	Signal transduction mechanisms	PREDICTED: uncharacterized protein LOC103329490 [Prunus mume]
F01_c16352/f1p1/3269	--	--	--	K03103|1.43356e-25|vvi:100253622|multiple inositol polyphosphate phosphatase 1-like; K03103 multiple inositol-polyphosphate phosphatase / 2,3-bisphosphoglycerate 3-phosphatase [EC:3.1.3.62 3.1.3.80] (A)	[R]	General function prediction only	--	--	R	General function prediction only	PREDICTED: multiple inositol polyphosphate phosphatase 1-like isoform X2 [Nicotiana sylvestris]
F01_c2234/f2p0/1167	[J]	Translation, ribosomal structure and biogenesis	Molecular Function: RNA binding (GO:0003723);; Biological Process: rRNA processing (GO:0006364);; Biological Process: tRNA processing (GO:0008033);; Molecular Function: methyltransferase activity (GO:0008168);; Biological Process: methylation (GO:0032259);;	K14563|3.79823e-97|eus:EUTSA_v10015801mg|hypothetical protein; K14563 rRNA 2'-O-methyltransferase fibrillarin [EC:2.1.1.-] (A)	[A]	RNA processing and modification	Fibrillarin	Putative rRNA 2&apos;-O-methyltransferase fibrillarin 3 GN=FIB3 OS=Arabidopsis thaliana (Mouse-ear cress) PE=2 SV=1	A	RNA processing and modification	hypothetical protein EUTSA_v10015801mg, partial [Eutrema salsugineum]
F01_c13432/f1p4/1972	[J]	Translation, ribosomal structure and biogenesis	Molecular Function: translation initiation factor activity (GO:0003743);; Biological Process: translational initiation (GO:0006413);; Biological Process: RNA metabolic process (GO:0016070);;	K03262|3.23062e-148|cic:CICLE_v10011756mg|hypothetical protein; K03262 translation initiation factor 5 (A)	[J]	Translation, ribosomal structure and biogenesis	Domain found in IF2B/IF5	Eukaryotic translation initiation factor 5 GN=EIF5 OS=Zea mays (Maize) PE=2 SV=1	J	Translation, ribosomal structure and biogenesis	hypothetical protein CISIN_1g013781mg [Citrus sinensis]
F01_c2746/f2p0/3721	--	--	--	--	--	--	Retrotransposon gag protein	NAD(P)H-quinone oxidoreductase subunit 2 B, chloroplastic {ECO:0000255|HAMAP-Rule:MF_00445} OS=Oenothera argillicola (Appalachian evening primrose) PE=3 SV=1	S	Function unknown	hypothetical protein VITISV_021080 [Vitis vinifera]
F01_c2232/f4p5/2047	[E]	Amino acid transport and metabolism	Molecular Function: gamma-glutamyltransferase activity (GO:0003840);; Cellular Component: vacuole (GO:0005773);; Biological Process: glutathione catabolic process (GO:0006751);; Molecular Function: glutathione gamma-glutamylcysteinyltransferase activity (GO:0016756);;	K18592|0|vvi:100247429|gamma-glutamyltranspeptidase 3; K18592 gamma-glutamyltranspeptidase / glutathione hydrolase / leukotriene-C4 hydrolase [EC:2.3.2.2 3.4.19.13 3.4.19.14] (A)	[E]	Amino acid transport and metabolism	Gamma-glutamyltranspeptidase	Gamma-glutamyltranspeptidase 3 GN=F17A13.30 OS=Arabidopsis thaliana (Mouse-ear cress) PE=2 SV=1	E	Amino acid transport and metabolism	PREDICTED: gamma-glutamyltranspeptidase 3 isoform X2 [Vitis vinifera]
F01_c3174/f4p1/1542	[RTKL]	--	Biological Process: MAPK cascade (GO:0000165);; Molecular Function: MAP kinase activity (GO:0004707);; Molecular Function: ATP binding (GO:0005524);; Biological Process: regulation of transcription, DNA-templated (GO:0006355);; Biological Process: protein phosphorylation (GO:0006468);; Biological Process: protein targeting to membrane (GO:0006612);; Biological Process: response to bacterium (GO:0…	K04371|0|vvi:100260441|mitogen-activated protein kinase homolog MMK2; K04371 mitogen-activated protein kinase 1/3 [EC:2.7.11.24] (A)	[T]	Signal transduction mechanisms	Protein kinase domain;; Protein tyrosine kinase	Mitogen-activated protein kinase homolog MMK2 GN=MMK2 OS=Medicago sativa (Alfalfa) PE=2 SV=1	T	Signal transduction mechanisms	PREDICTED: mitogen-activated protein kinase homolog MMK2 [Nelumbo nucifera]
F01_c9393/f2p4/2096	[R]	General function prediction only	--	K11804|0|pmum:103334868|DDB1- and CUL4-associated factor 8; K11804 WD repeat-containing protein 42A (A)	[R]	General function prediction only	WD domain, G-beta repeat	Protein pleiotropic regulatory locus 1 OS=Arabidopsis thaliana (Mouse-ear cress) PE=1 SV=1	R	General function prediction only	PREDICTED: DDB1- and CUL4-associated factor 8 isoform X3 [Prunus mume]
F01_c14274/f1p241/1494	[O]	Posttranslational modification, protein turnover, chaperones	Molecular Function: ATP binding (GO:0005524);; Biological Process: response to stress (GO:0006950);;	K03283|0|tcc:TCM_041868|Heat shock cognate protein 70-1; K03283 heat shock 70kDa protein 1/8 (A)	[O]	Posttranslational modification, protein turnover, chaperones	Hsp70 protein	Heat shock cognate 70 kDa protein 2 GN=HSC-2 OS=Solanum lycopersicum (Tomato) PE=1 SV=1	O	Posttranslational modification, protein turnover, chaperones	Heat shock cognate protein 70-1 [Theobroma cacao]
F01_c11425/f2p4/2017	[E]	Amino acid transport and metabolism	Molecular Function: asparagine synthase (glutamine-hydrolyzing) activity (GO:0004066);; Molecular Function: aspartate-ammonia ligase activity (GO:0004071);; Molecular Function: ATP binding (GO:0005524);; Cellular Component: cytosol (GO:0005829);; Biological Process: L-asparagine biosynthetic process (GO:0070981);;	K01953|0|pmum:103332963|asparagine synthetase [glutamine-hydrolyzing] 2; K01953 asparagine synthase (glutamine-hydrolysing) [EC:6.3.5.4] (A)	[E]	Amino acid transport and metabolism	Glutamine amidotransferase domain	Asparagine synthetase [glutamine-hydrolyzing] OS=Brassica oleracea (Wild cabbage) PE=2 SV=2	E	Amino acid transport and metabolism	hypothetical protein JCGZ_24045 [Jatropha curcas]
F01_c13134/f1p1/1335	[E]	Amino acid transport and metabolism	Molecular Function: cysteine synthase activity (GO:0004124);; Biological Process: cysteine biosynthetic process from serine (GO:0006535);; Molecular Function: transferase activity (GO:0016740);; Molecular Function: pyridoxal phosphate binding (GO:0030170);; Biological Process: photoperiodism, flowering (GO:0048573);;	K01738|0|vvi:100260099|cysteine synthase 2; K01738 cysteine synthase A [EC:2.5.1.47] (A)	[E]	Amino acid transport and metabolism	Pyridoxal-phosphate dependent enzyme	Bifunctional L-3-cyanoalanine synthase/cysteine synthase, mitochondrial (Precursor) GN=CYSC OS=Spinacia oleracea (Spinach) PE=1 SV=1	E	Amino acid transport and metabolism	PREDICTED: cysteine synthase 2 isoform X1 [Vitis vinifera]
F01_c3728/f1p0/2102	--	--	--	--	--	--	BURP domain	Probable polygalacturonase non-catalytic subunit JP650 (Precursor) GN=JP650 OS=Arabidopsis thaliana (Mouse-ear cress) PE=2 SV=2	R	General function prediction only	PREDICTED: probable polygalacturonase non-catalytic subunit JP630 [Vitis vinifera]
F01_c5475/f1p6/1443	--	--	--	K03456|0|vvi:100266203|serine/threonine-protein phosphatase 2A 65 kDa regulatory subunit A beta isoform; K03456 serine/threonine-protein phosphatase 2A regulatory subunit A (A)	[T]	Signal transduction mechanisms	HEAT repeat;; HEAT repeats;; HEAT-like repeat;; Vacuolar 14 Fab1-binding region;; non-SMC mitotic condensation complex subunit 1	Serine/threonine-protein phosphatase 2A 65 kDa regulatory subunit A beta isoform GN=K13N2.14 OS=Arabidopsis thaliana (Mouse-ear cress) PE=1 SV=2	T	Signal transduction mechanisms	PREDICTED: serine/threonine-protein phosphatase 2A 65 kDa regulatory subunit A beta isoform-like [Populus euphratica]
F01_c16460/f1p11/2569	[V]	Defense mechanisms	Molecular Function: ATP binding (GO:0005524);; Biological Process: ATP catabolic process (GO:0006200);; Cellular Component: integral component of membrane (GO:0016021);; Molecular Function: ATPase activity, coupled to transmembrane movement of substances (GO:0042626);; Biological Process: transmembrane transport (GO:0055085);;	--	[U]	Intracellular trafficking, secretion, and vesicular transport	ABC transporter transmembrane region;; ABC transporter	ABC transporter B family member 25 GN=OSJNBb0081K01.19 OS=Oryza sativa subsp. japonica (Rice) PE=2 SV=1	Q	Secondary metabolites biosynthesis, transport and catabolism	Transporter associated with antigen processing protein 2 isoform 1 [Theobroma cacao]
F01_c9095/f2p2/3462	[O]	Posttranslational modification, protein turnover, chaperones	--	--	[O]	Posttranslational modification, protein turnover, chaperones	ATPase family associated with various cellular activities (AAA);; IstB-like ATP binding protein;; Holliday junction DNA helicase ruvB N-terminus	Katanin p60 ATPase-containing subunit A1 {ECO:0000255|HAMAP-Rule:MF_03023} GN=At1g80350 OS=Arabidopsis thaliana (Mouse-ear cress) PE=1 SV=1	O	Posttranslational modification, protein turnover, chaperones	PREDICTED: uncharacterized protein LOC103321069 isoform X1 [Prunus mume]
F01_c895/f1p0/947	--	--	--	--	--	--	GRF zinc finger	--	--	--	hypothetical protein PRUPE_ppa012827mg [Prunus persica]
F01_c2983/f3p3/2162	[G]	Carbohydrate transport and metabolism	Molecular Function: 6-phosphofructokinase activity (GO:0003872);; Molecular Function: ATP binding (GO:0005524);; Cellular Component: 6-phosphofructokinase complex (GO:0005945);; Biological Process: fructose 6-phosphate metabolic process (GO:0006002);; Biological Process: glycolytic process (GO:0006096);; Biological Process: phosphorylation (GO:0016310);;	K00850|0|vvi:100243946|ATP-dependent 6-phosphofructokinase 3-like; K00850 6-phosphofructokinase 1 [EC:2.7.1.11] (A)	[G]	Carbohydrate transport and metabolism	Phosphofructokinase	ATP-dependent 6-phosphofructokinase 3 {ECO:0000255|HAMAP-Rule:MF_03186} GN=At4g26270 OS=Arabidopsis thaliana (Mouse-ear cress) PE=1 SV=1	G	Carbohydrate transport and metabolism	hypothetical protein JCGZ_07340 [Jatropha curcas]
F01_c5821/f1p1/1062	--	--	--	K05387|7.76341e-80|cit:102628751|glutamate receptor 2.7-like; K05387 glutamate receptor, ionotropic, plant (A)	[PET]	--	--	Glutamate receptor 2.8 (Precursor) GN=T9I4.19 OS=Arabidopsis thaliana (Mouse-ear cress) PE=2 SV=2	597	glutamate receptor	hypothetical protein CISIN_1g043276mg, partial [Citrus sinensis]
F01_c14882/f1p2/2921	--	--	Biological Process: vesicle docking involved in exocytosis (GO:0006904);;	--	--	--	Sec1 family	Sec1 family domain-containing protein MIP3 {ECO:0000305} OS=Arabidopsis thaliana (Mouse-ear cress) PE=1 SV=1	S	Function unknown	PREDICTED: sec1 family domain-containing protein MIP3 [Vitis vinifera]
F01_c17253/f1p1/4025	--	--	Molecular Function: sequence-specific DNA binding transcription factor activity (GO:0003700);; Cellular Component: nucleus (GO:0005634);; Biological Process: regulation of transcription, DNA-templated (GO:0006355);; Molecular Function: sequence-specific DNA binding (GO:0043565);;	--	--	--	WSTF, HB1, Itc1p, MBD9 motif 1	--	R	General function prediction only	PREDICTED: uncharacterized protein LOC105113647 isoform X1 [Populus euphratica]
F01_c4538/f1p1/2451	[RTKL]	--	Molecular Function: protein serine/threonine kinase activity (GO:0004674);; Molecular Function: ATP binding (GO:0005524);; Biological Process: protein phosphorylation (GO:0006468);;	--	--	--	Protein kinase domain;; Protein tyrosine kinase	Putative cysteine-rich receptor-like protein kinase 20 (Precursor) GN=CRK20 OS=Arabidopsis thaliana (Mouse-ear cress) PE=2 SV=2	T	Signal transduction mechanisms	PREDICTED: cysteine-rich receptor-like protein kinase 8 isoform X2 [Eucalyptus grandis]
F01_c9079/f1p1/2103	--	--	--	--	[R]	General function prediction only	zinc-binding in reverse transcriptase	--	R	General function prediction only	PREDICTED: uncharacterized protein LOC104705067 [Camelina sativa]
F01_c1554/f1p0/796	--	--	--	--	[S]	Function unknown	--	Late embryogenesis abundant protein Dc3 OS=Daucus carota (Wild carrot) PE=2 SV=1	S	Function unknown	PREDICTED: late embryogenesis abundant protein 2 [Malus domestica]
F01_c1871/f1p1/929	--	--	Molecular Function: DNA binding (GO:0003677);; Molecular Function: chromatin binding (GO:0003682);; Cellular Component: nucleus (GO:0005634);; Cellular Component: chloroplast (GO:0009507);;	--	--	--	Protein of unknown function (DUF3755)	--	R	General function prediction only	hypothetical protein CISIN_1g024388mg [Citrus sinensis]
F01_c7259/f1p1/1188	--	--	Biological Process: cellulose biosynthetic process (GO:0030244);; Biological Process: Golgi vesicle transport (GO:0048193);;	--	[S]	Function unknown	DDRGK domain	DDRGK domain-containing protein 1 (Precursor) GN=At4g27120 OS=Arabidopsis thaliana (Mouse-ear cress) PE=2 SV=1	S	Function unknown	PREDICTED: DDRGK domain-containing protein 1 [Vitis vinifera]
F01_c9264/f3p1/1468	--	--	--	--	[M]	Cell wall/membrane/envelope biogenesis	Pectinacetylesterase	--	S	Function unknown	PREDICTED: protein notum homolog [Prunus mume]
F01_c9354/f1p1/1091	[C]	Energy production and conversion	--	--	[C]	Energy production and conversion	Aldo/keto reductase family	Perakine reductase GN=PR OS=Rauvolfia serpentina (Serpentine wood) PE=1 SV=1	C	Energy production and conversion	NAD(P)-linked oxidoreductase superfamily protein [Theobroma cacao]
F01_c11558/f1p8/2512	[C]	Energy production and conversion	Molecular Function: NADH dehydrogenase activity (GO:0003954);; Cellular Component: mitochondrion (GO:0005739);; Molecular Function: quinone binding (GO:0048038);; Molecular Function: NAD binding (GO:0051287);; Biological Process: oxidation-reduction process (GO:0055114);;	K03935|2.58172e-100|csv:101222212|NADH dehydrogenase [ubiquinone] iron-sulfur protein 2-like; K03935 NADH dehydrogenase (ubiquinone) Fe-S protein 2 [EC:1.6.5.3 1.6.99.3] (A)	[C]	Energy production and conversion	Respiratory-chain NADH dehydrogenase, 49 Kd subunit	NADH dehydrogenase [ubiquinone] iron-sulfur protein 2 GN=NAD7 OS=Nicotiana sylvestris (Wood tobacco) PE=2 SV=1	C	Energy production and conversion	unnamed protein product [Vitis vinifera]
[truncated: 28,099 more rows]

## Sheet: Function_anno.stat
#Anno_Database	Annotated_Number	300<=length<1000	length>=1000
COG_Annotation	12892	519	12373
GO_Annotation	20052	898	19154
KEGG_Annotation	13487	620	12867
KOG_Annotation	18842	788	18054
Pfam_Annotation	33856	1097	32759
Swissprot_Annotation	21929	951	20978
eggNOG_Annotation	28606	1257	27349
nr_Annotation	28790	1272	27518
All_Annotated	28850	1281	27569

## Sheet: GO.list
F01_c10000/f1p2/2225	GO:0004721	GO:0005634	GO:0008152
[truncated: 20,051 more rows]

## Sheet: GO_tree.stat
#GO_Function	Unigene_number	Unigene_ID
[truncated: 4,123 more rows]

[truncated: 2 more sheets: Kegg.pathway, Kegg.ko]
